# Supplementary material for: Direct, four-step synthetic pathway to iheyamine A and several analogues
Source: Royal Society of Chemistry journal article supplement (doi:10.1039/d2ob00397j), 2022-01-01

## *Supporting Information*

### **Direct, four-step synthetic pathway to iheyamine A and several analogues**

Wenfei Wei,<sup>†</sup> Dinglei Xiang,<sup>†</sup> and Sheng Liu\*

**Table S1** Comparison of Natural vs. Synthetic Iheyamine A (Free base, <sup>1</sup>H NMR only).

**Table S2** Comparison of Natural vs. Synthetic Iheyamine A (TFA salt, <sup>1</sup>H and <sup>13</sup>C NMR).

NMR and HRMS of compounds **6**, **6a-i**, **7**, **7a-i**, **8a**, Iheyamines A (**1**), **1a-i**.

**Table S1** Comparison of Natural vs. Synthetic Iheyamine A (Free base, <sup>1</sup>H NMR only).**Iheyamine A-Free Base**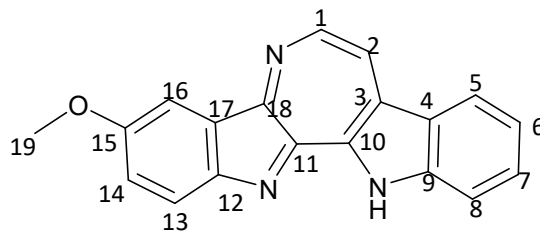**<sup>1</sup>H NMR**

| Pos. | Lit <sup>1</sup> . (500 MHz, CDCl <sub>3</sub> ) | Synthetic (600 MHz, CDCl <sub>3</sub> ) |
|------|--------------------------------------------------|-----------------------------------------|
| 1    | 9.04, d (6.4)                                    | 9.05, d (6.5)                           |
| 2    | 8.55, d (6.4)                                    | 8.56, d (6.5)                           |
| 3    | -                                                | -                                       |
| 4    | -                                                | -                                       |
| 5    | 8.37, d (7.9)                                    | 8.39, d (7.8)                           |
| 6    | 7.52, dd (7.9, 7.0)                              | 7.53, t (7.4)                           |
| 7    | 7.74, dd (7.9, 7.0)                              | 7.72, t (7.6)                           |
| 8    | 7.86, d (7.9)                                    | 7.81, d (7.8)                           |
| 9    | -                                                | -                                       |
| 10   | -                                                | -                                       |
| 11   | -                                                | -                                       |
| 12   | -                                                | -                                       |
| 13   | 7.70, d (8.9)                                    | 7.64, d (8.7)                           |
| 14   | 7.37, dd (8.9, 2.4)                              | 7.35, dd (8.7, 2.4)                     |
| 15   | -                                                | -                                       |
| 16   | 8.01, d (2.4)                                    | 8.03, d (2.4)                           |
| 17   | -                                                | -                                       |
| 18   | -                                                | -                                       |
| 19   | 4.02, s                                          | 4.04, s                                 |

**Table S2** Comparison of Natural vs. Synthetic Iheyamine A (TFA salt,  $^1\text{H}$  and  $^{13}\text{C}$  NMR).

**Iheyamine A-TFA Salt**

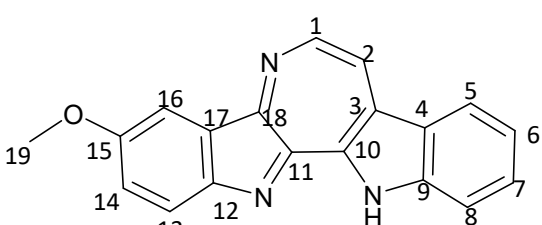

| $^1\text{H}$ NMR |                                               | $^{13}\text{C}$ NMR                   |                                               |                                       |                             |
|------------------|-----------------------------------------------|---------------------------------------|-----------------------------------------------|---------------------------------------|-----------------------------|
| Pos.             | Lit. <sup>1</sup> (500 MHz, $\text{CDCl}_3$ ) | Synthetic (500 MHz, $\text{CDCl}_3$ ) | Lit. <sup>1</sup> (600 MHz, $\text{CDCl}_3$ ) | Synthetic (600 MHz, $\text{CDCl}_3$ ) | (150 MHz, $\text{CDCl}_3$ ) |
| 1                | 9.38, d (6.4)                                 | 9.36, d (6.5)                         | 143.2, CH                                     | 143.2, CH                             |                             |
| 2                | 8.85, d (6.4)                                 | 8.82, d (6.7)                         | 124.5, CH                                     | 124.5, CH                             |                             |
| 3                | -                                             | -                                     | 128.3, C                                      | 127.9, C                              |                             |
| 4                | -                                             | -                                     | 123.8, C                                      | 123.8, C                              |                             |
| 5                | 8.42, d (7.9)                                 | 8.39, d (8.0)                         | 121.4, CH                                     | 121.4, CH                             |                             |
| 6                | 7.61, dd (7.9, 7.0)                           | 7.59, t (7.5)                         | 124.4, CH                                     | 124.4, CH                             |                             |
| 7                | 7.84, dd (7.9, 7.0)                           | 7.89, d (2.4)                         | 132.8, CH                                     | 132.8, CH                             |                             |
| 8                | 8.05, d (7.9)                                 | 7.98, d (8.2)                         | 115.1, CH                                     | 114.9, CH                             |                             |
| 9                | -                                             | -                                     | 144.0, C                                      | 143.8, C                              |                             |
| 10               | -                                             | -                                     | 138.1, C                                      | 138.0, C                              |                             |
| 11               | -                                             | -                                     | 148.9, C                                      | 148.7, C                              |                             |
| 12               | -                                             | -                                     | 138.2, C                                      | 138.0, C                              |                             |
| 13               | 7.99, d (8.9)                                 | 7.94, d (8.7)                         | 115.7, CH                                     | 115.6, CH                             |                             |
| 14               | 7.52, dd (8.9, 2.4)                           | 7.50, dd (8.7, 2.5)                   | 124.1, CH                                     | 124.0, CH                             |                             |
| 15               | -                                             | -                                     | 157.5, C                                      | 157.4, C                              |                             |
| 16               | 7.96, d (2.4)                                 | 7.89, d (2.4)                         | 102.8, CH                                     | 102.6, CH                             |                             |
| 17               | -                                             | -                                     | 126.1, C                                      | 126.0, C                              |                             |
| 18               | -                                             | -                                     | 135.7, C                                      | 135.5, C                              |                             |
| 19               | 4.02, s                                       | 4.01, s                               | 56.0, Me                                      | 55.9, Me                              |                             |

1 T. Sasaki, I. I. Ohtani, J. Tanaka and T. Higa, *Tetrahedron Lett.*, 1999, **40**, 303.



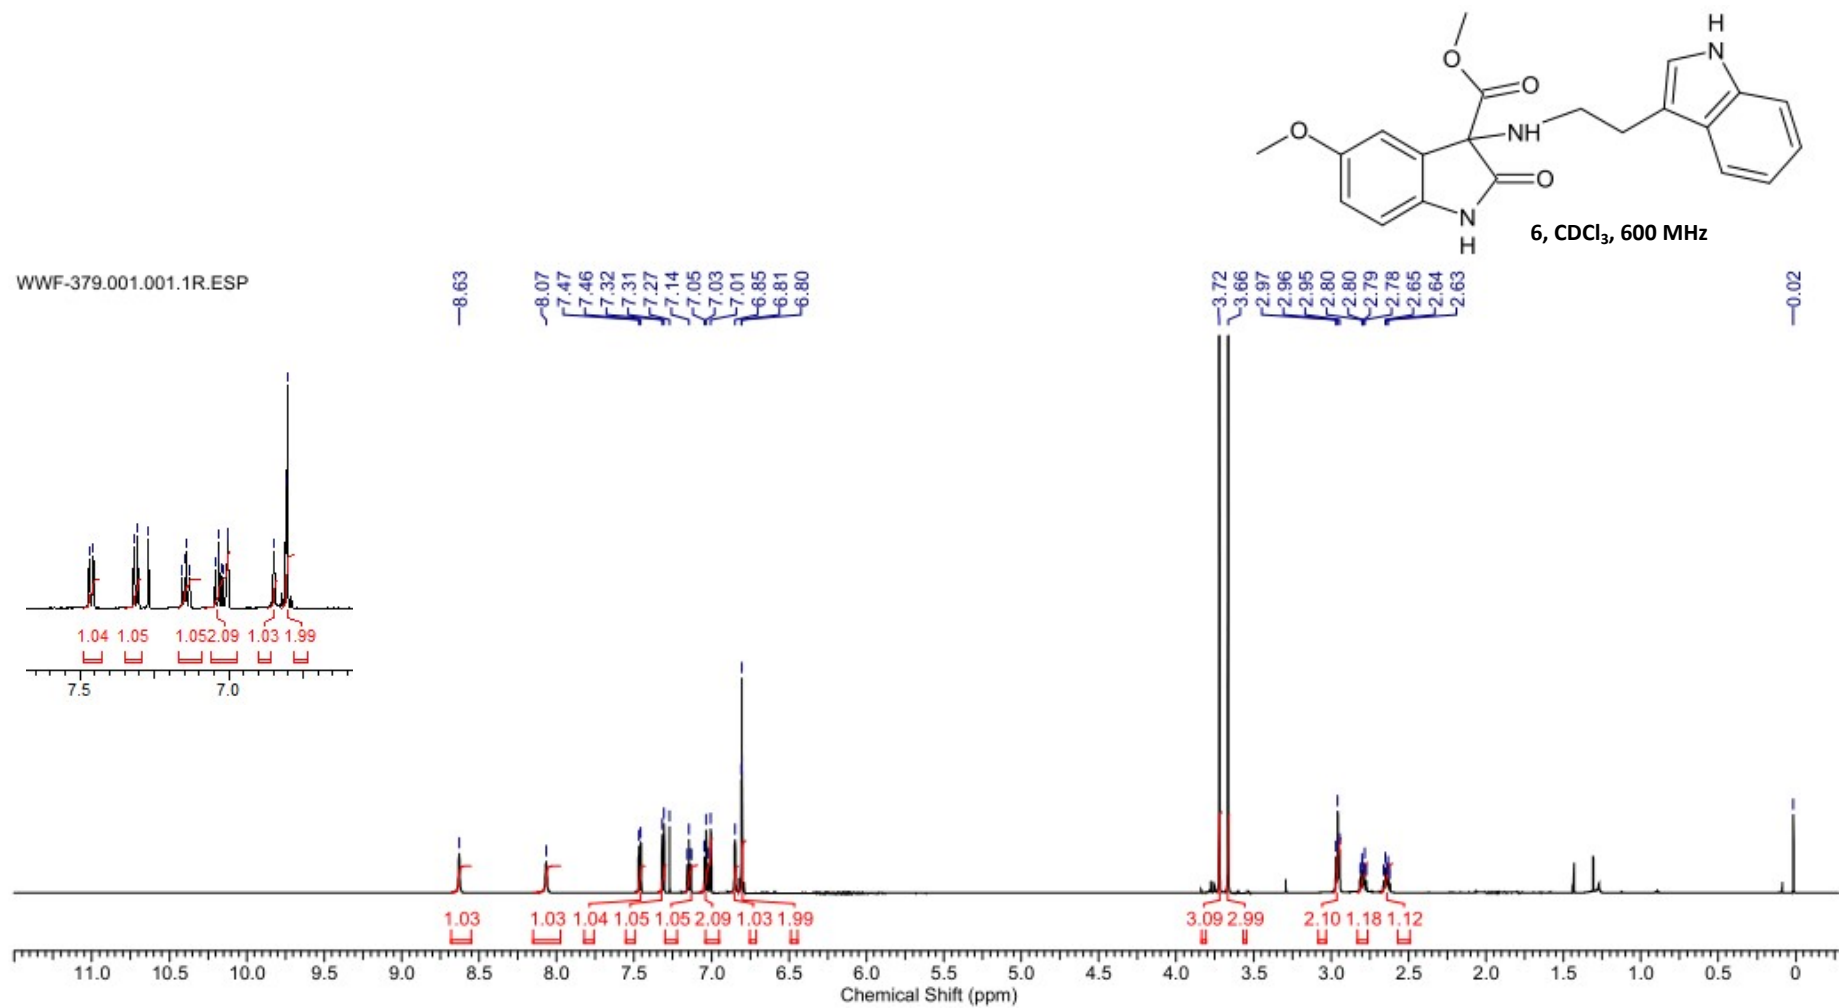

WWF-379.002.001.1R.ESP

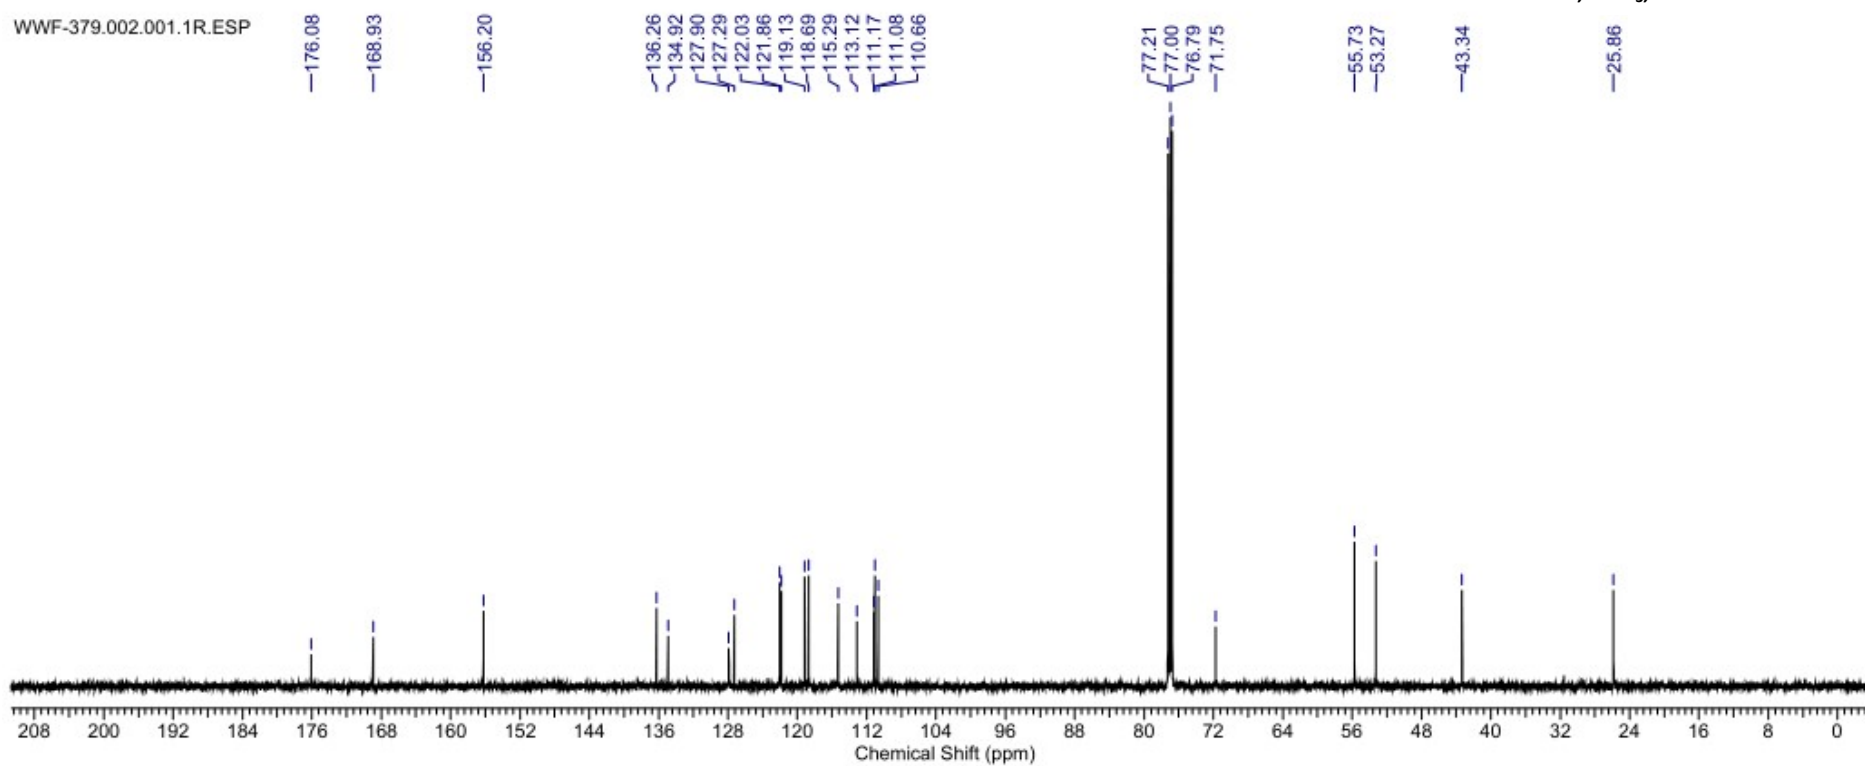

WWF-22379 #21 RT: 0.09 AV: 1 NL: 5.89E9  
T: FTMS + p ESI Full ms[100.0000-1500.0000]

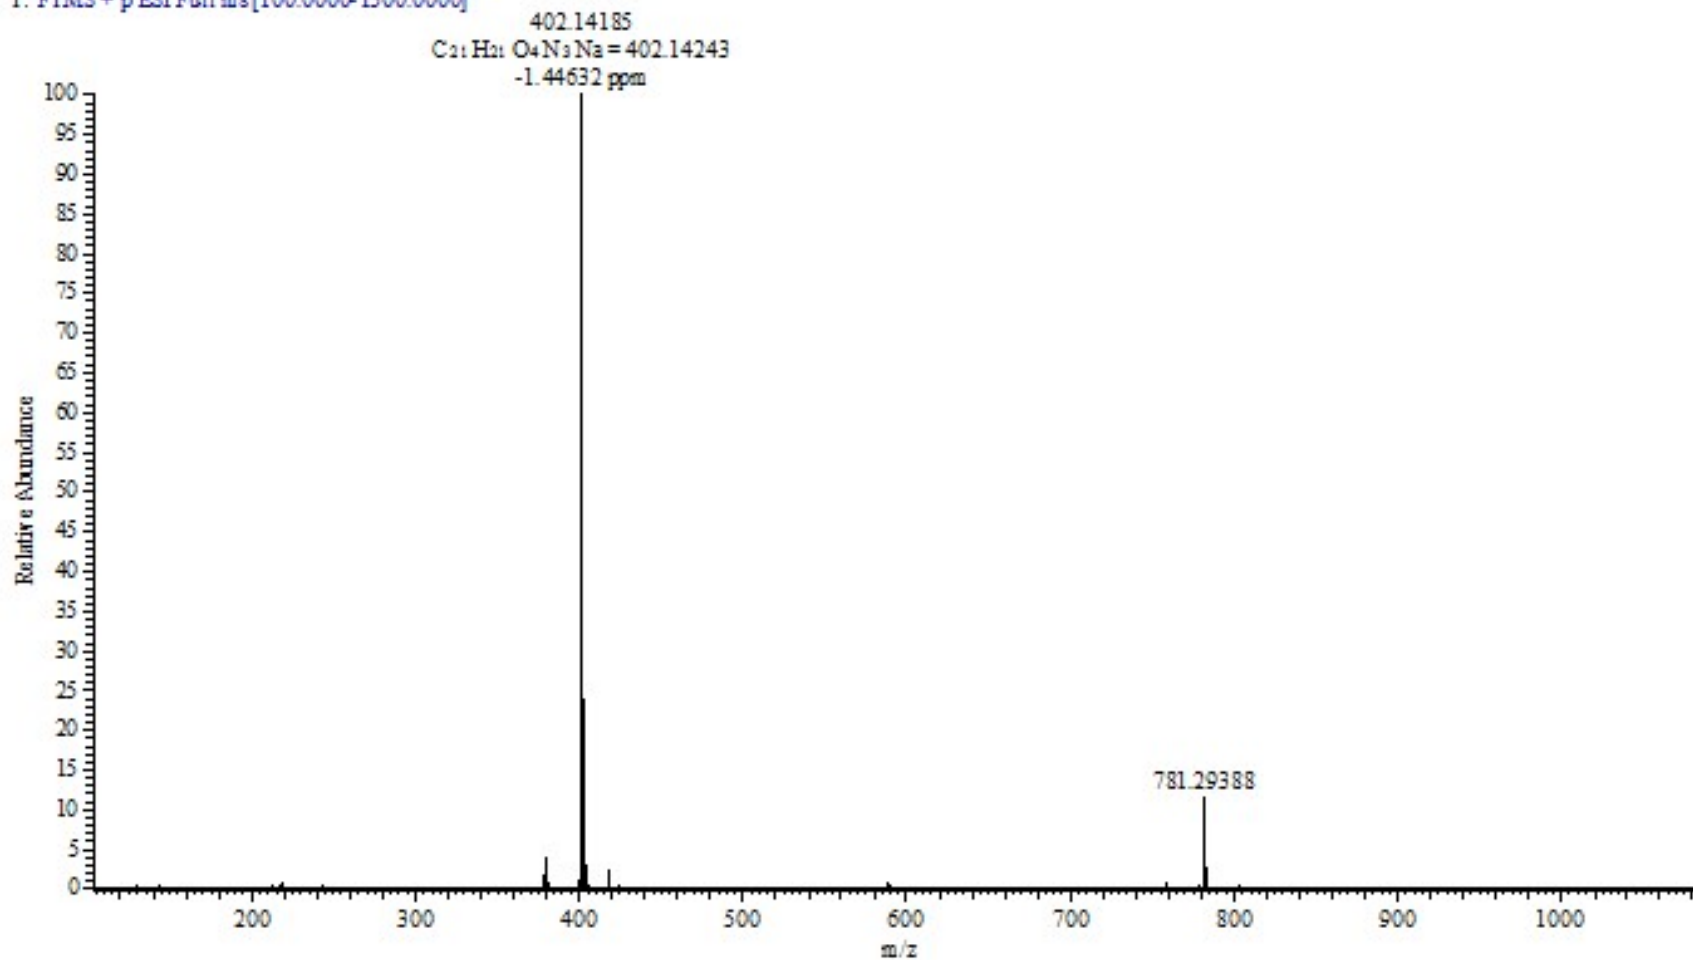

WWF-20349.001.001.1R.ESP

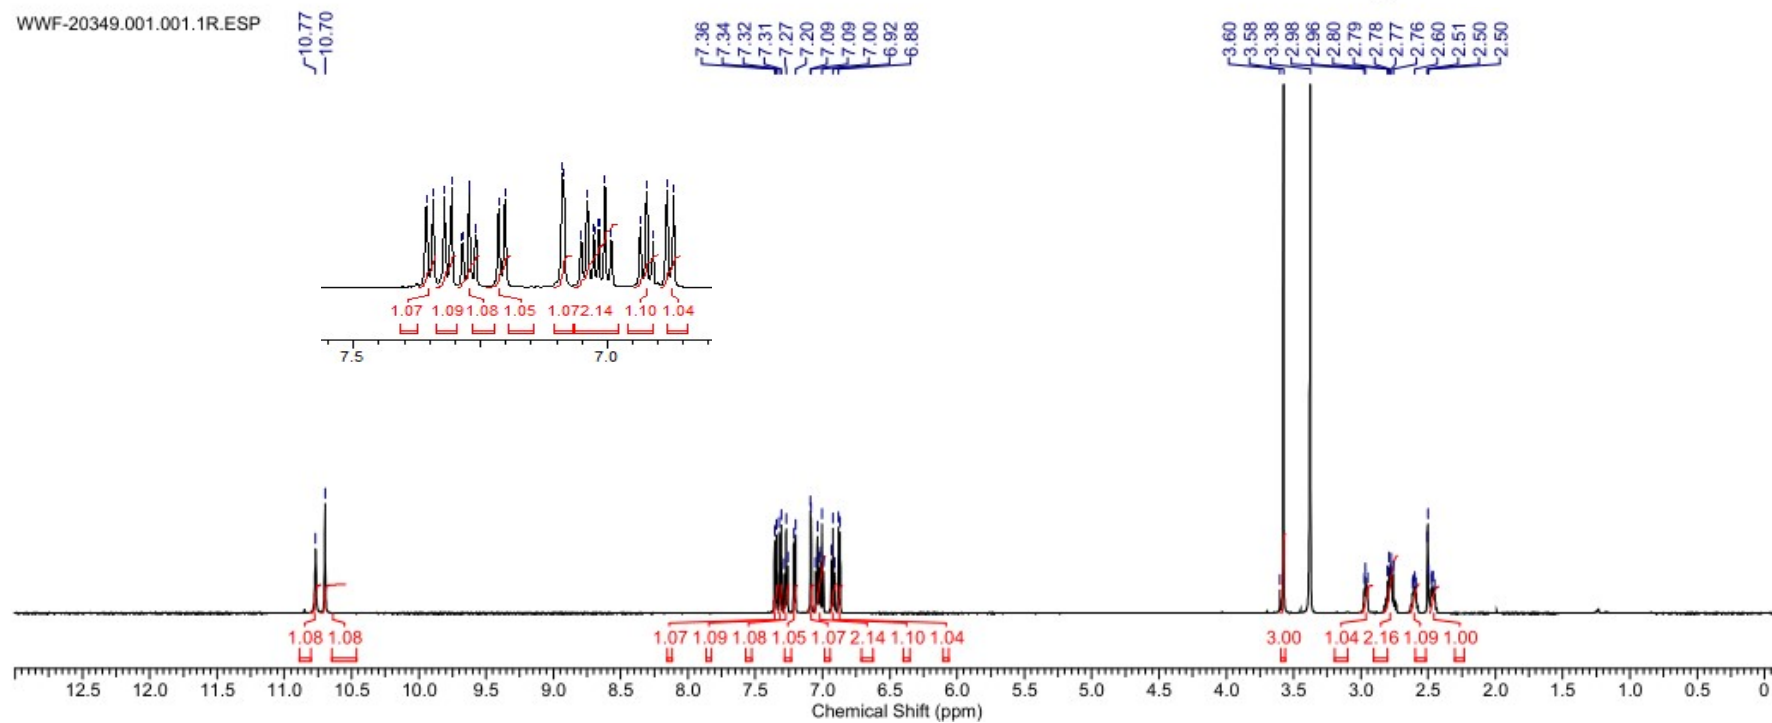



WWF-20349.003.001.1R.ESP

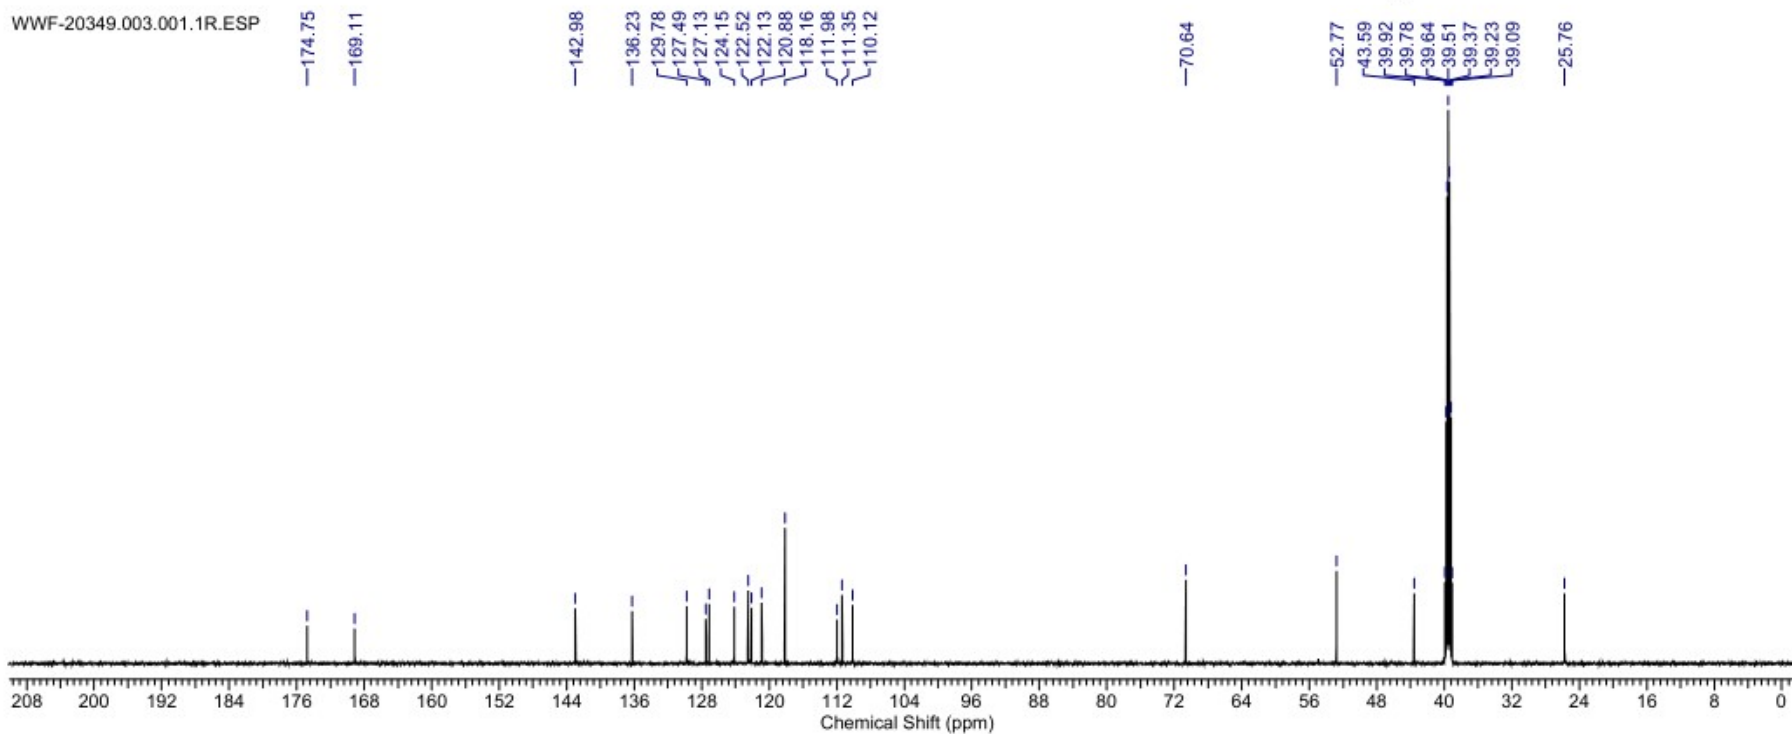

WWF-22349 #22 RT: 0.10 AV: 1 NL: 6.73E9  
T: FTMS + p ESI Full ms [100.0000-1500.0000]

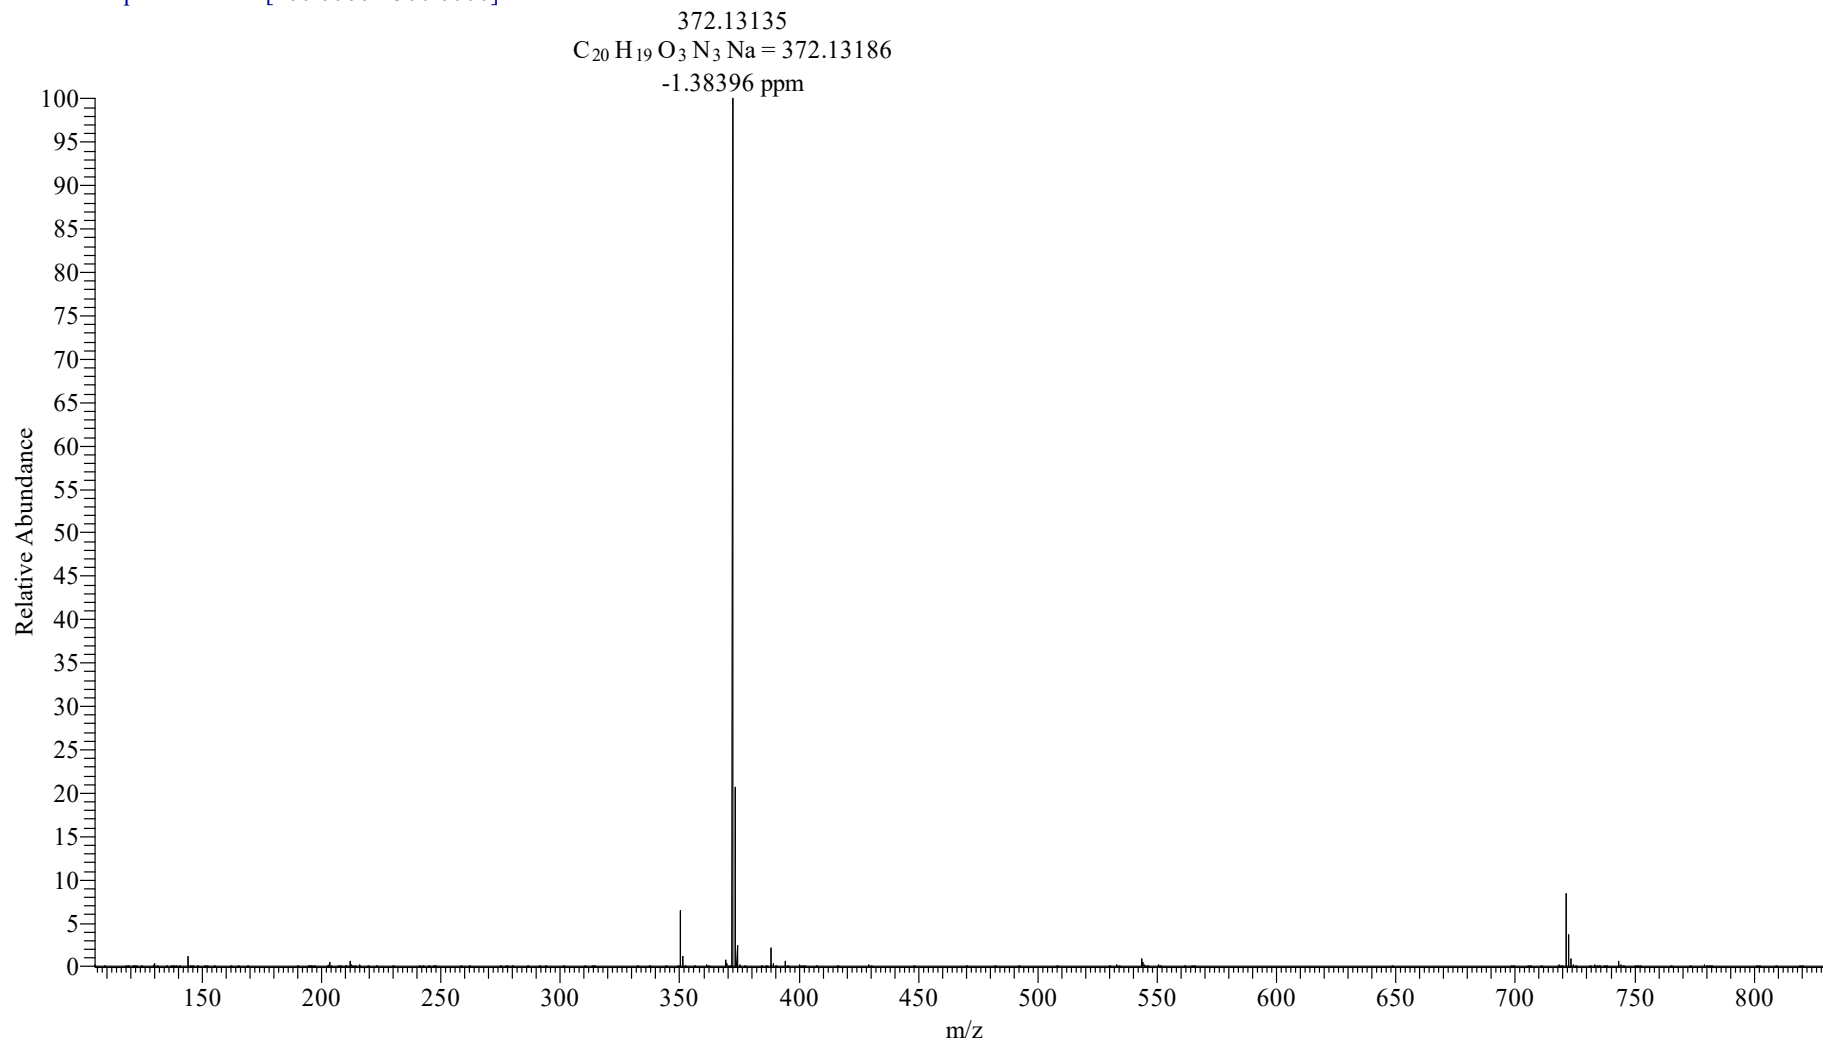

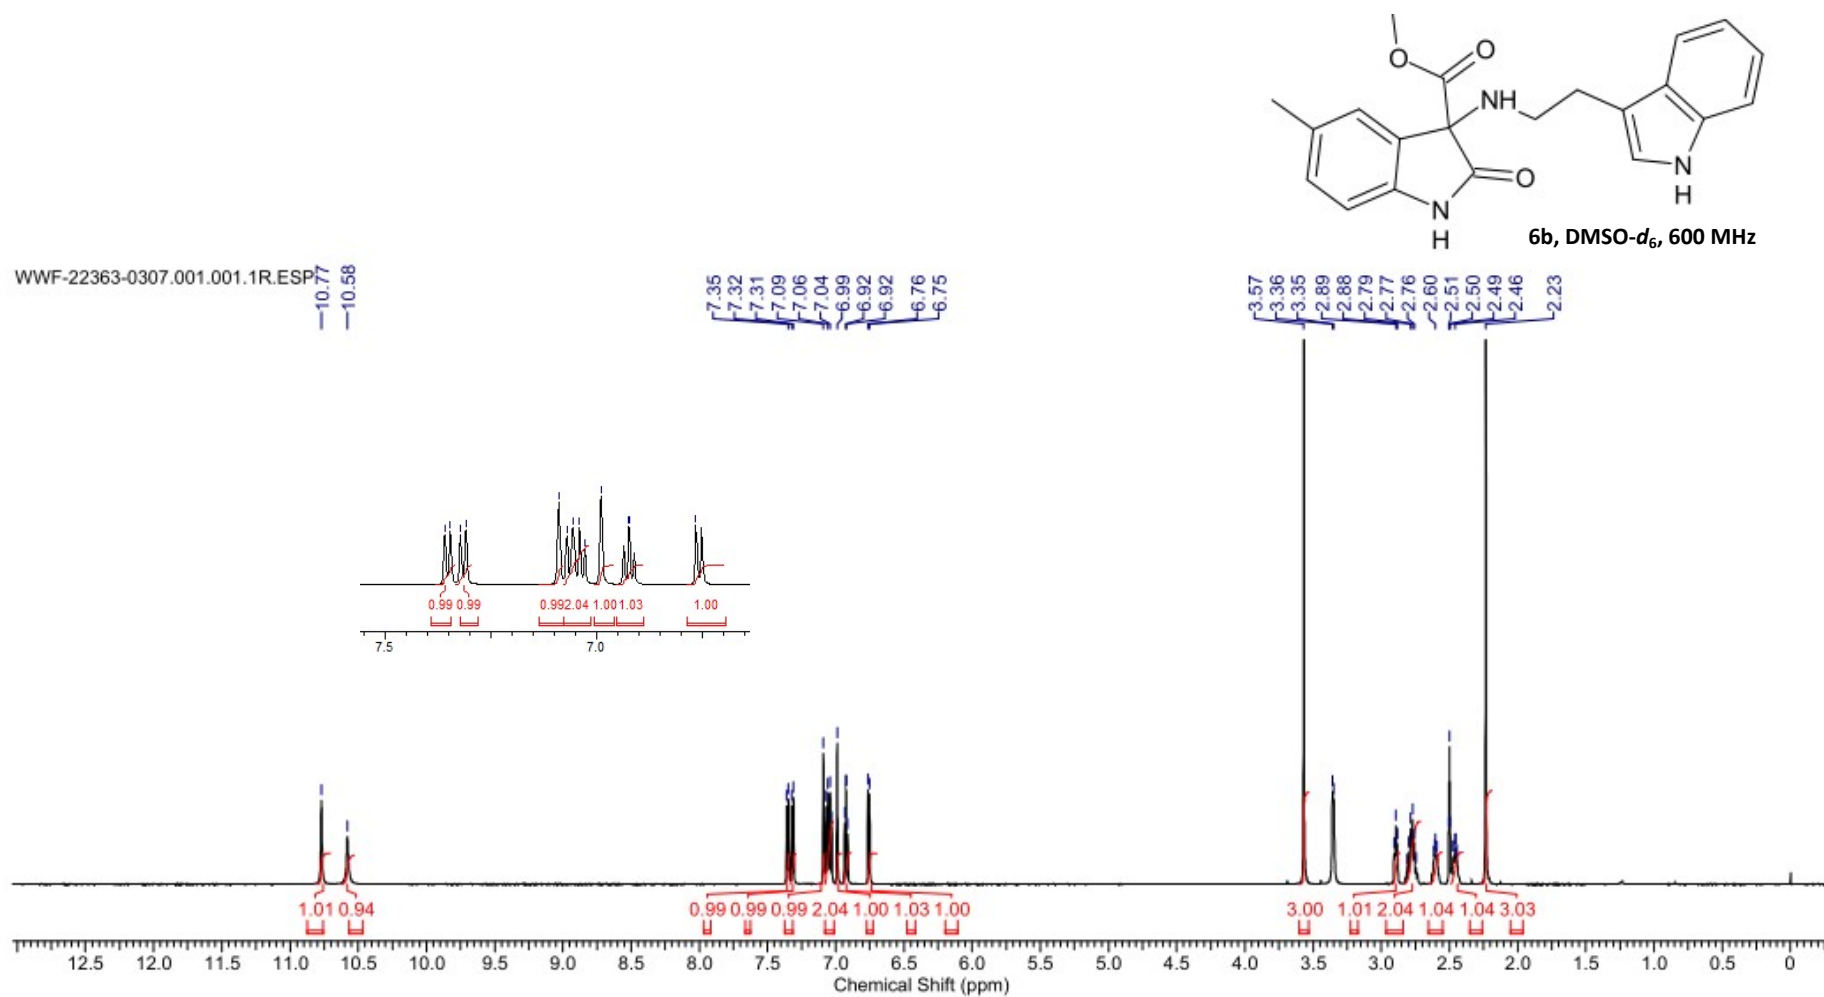

WWF-22363-002.001.1R.ESP

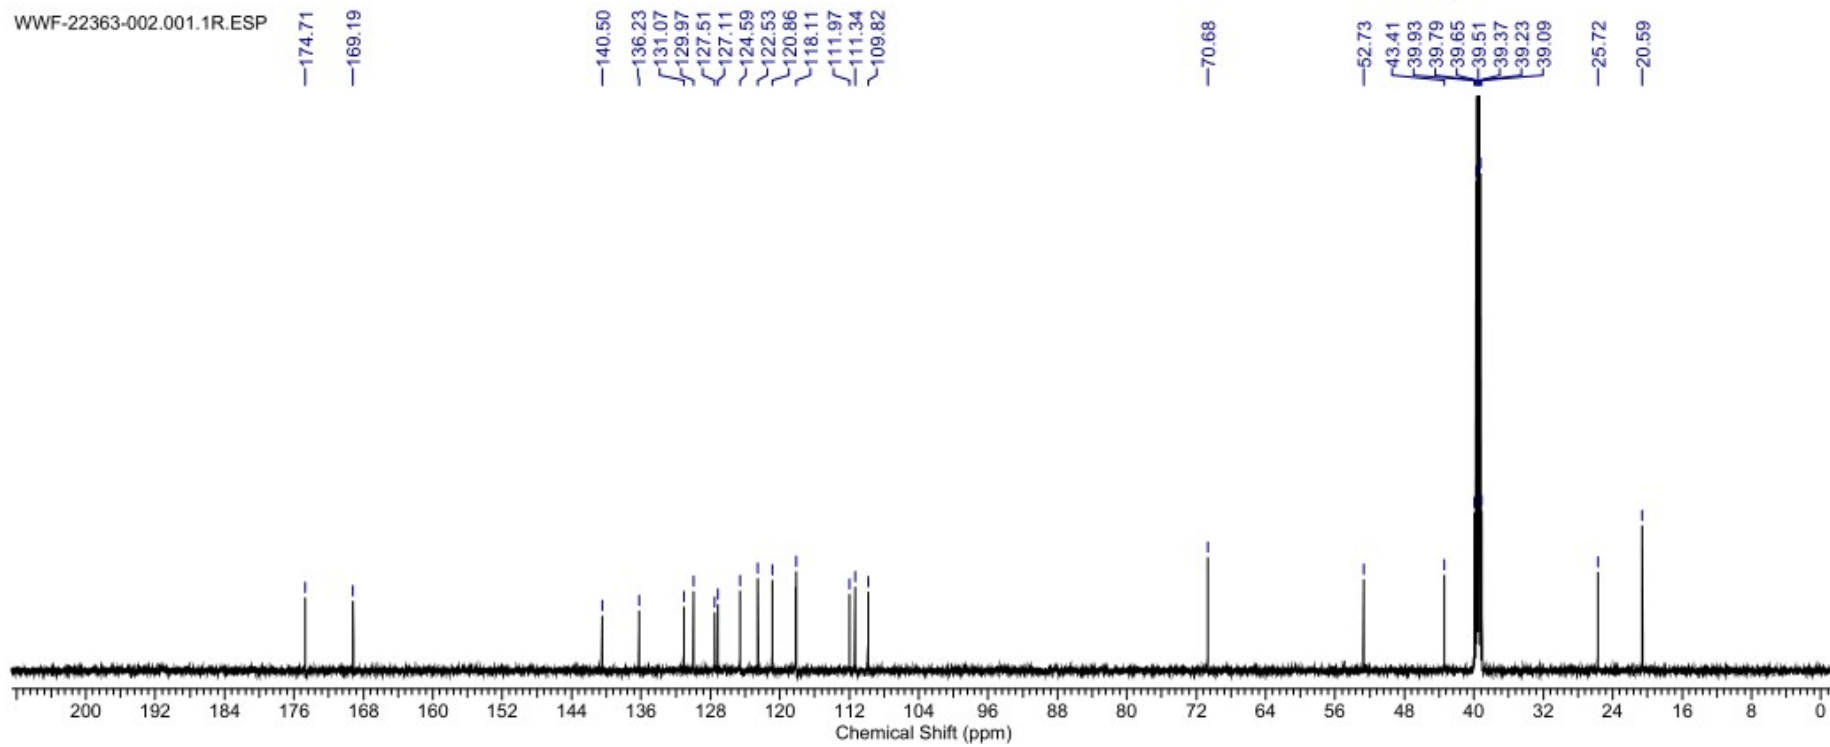

WWF-22363 #20 RT: 0.09 AV: 1 NL: 5.27E9  
T: FTMS + p ESI Full ms [100.0000-1500.0000]

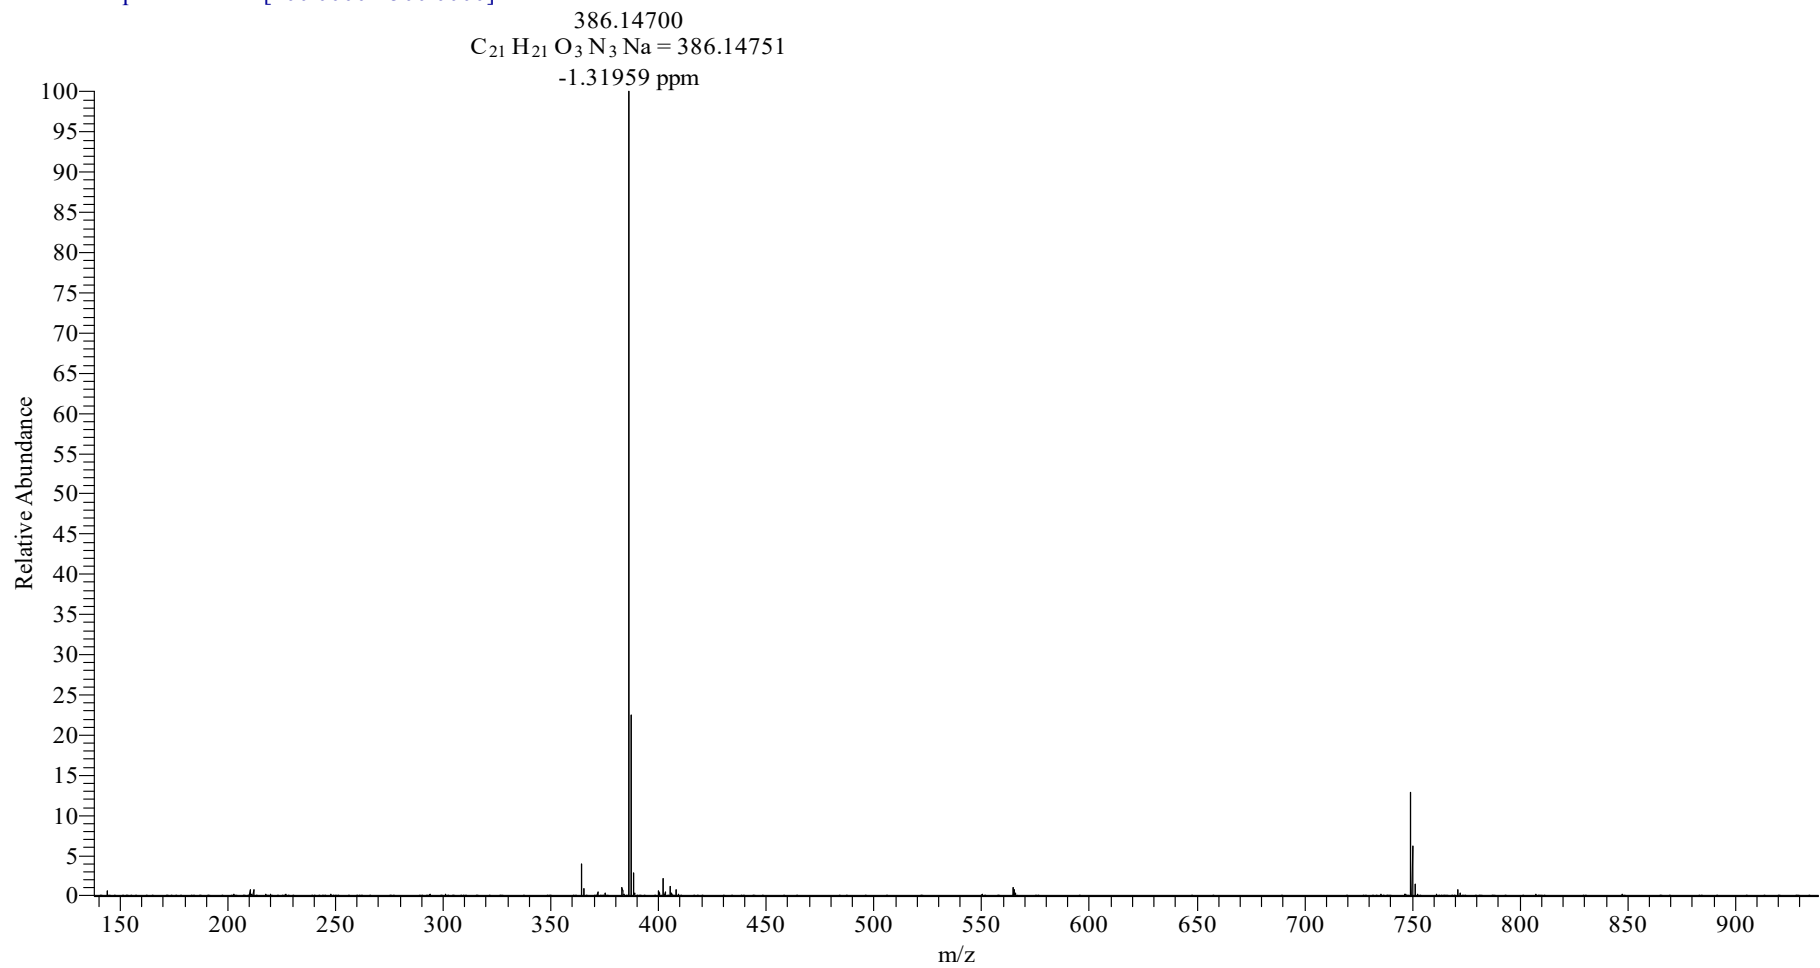

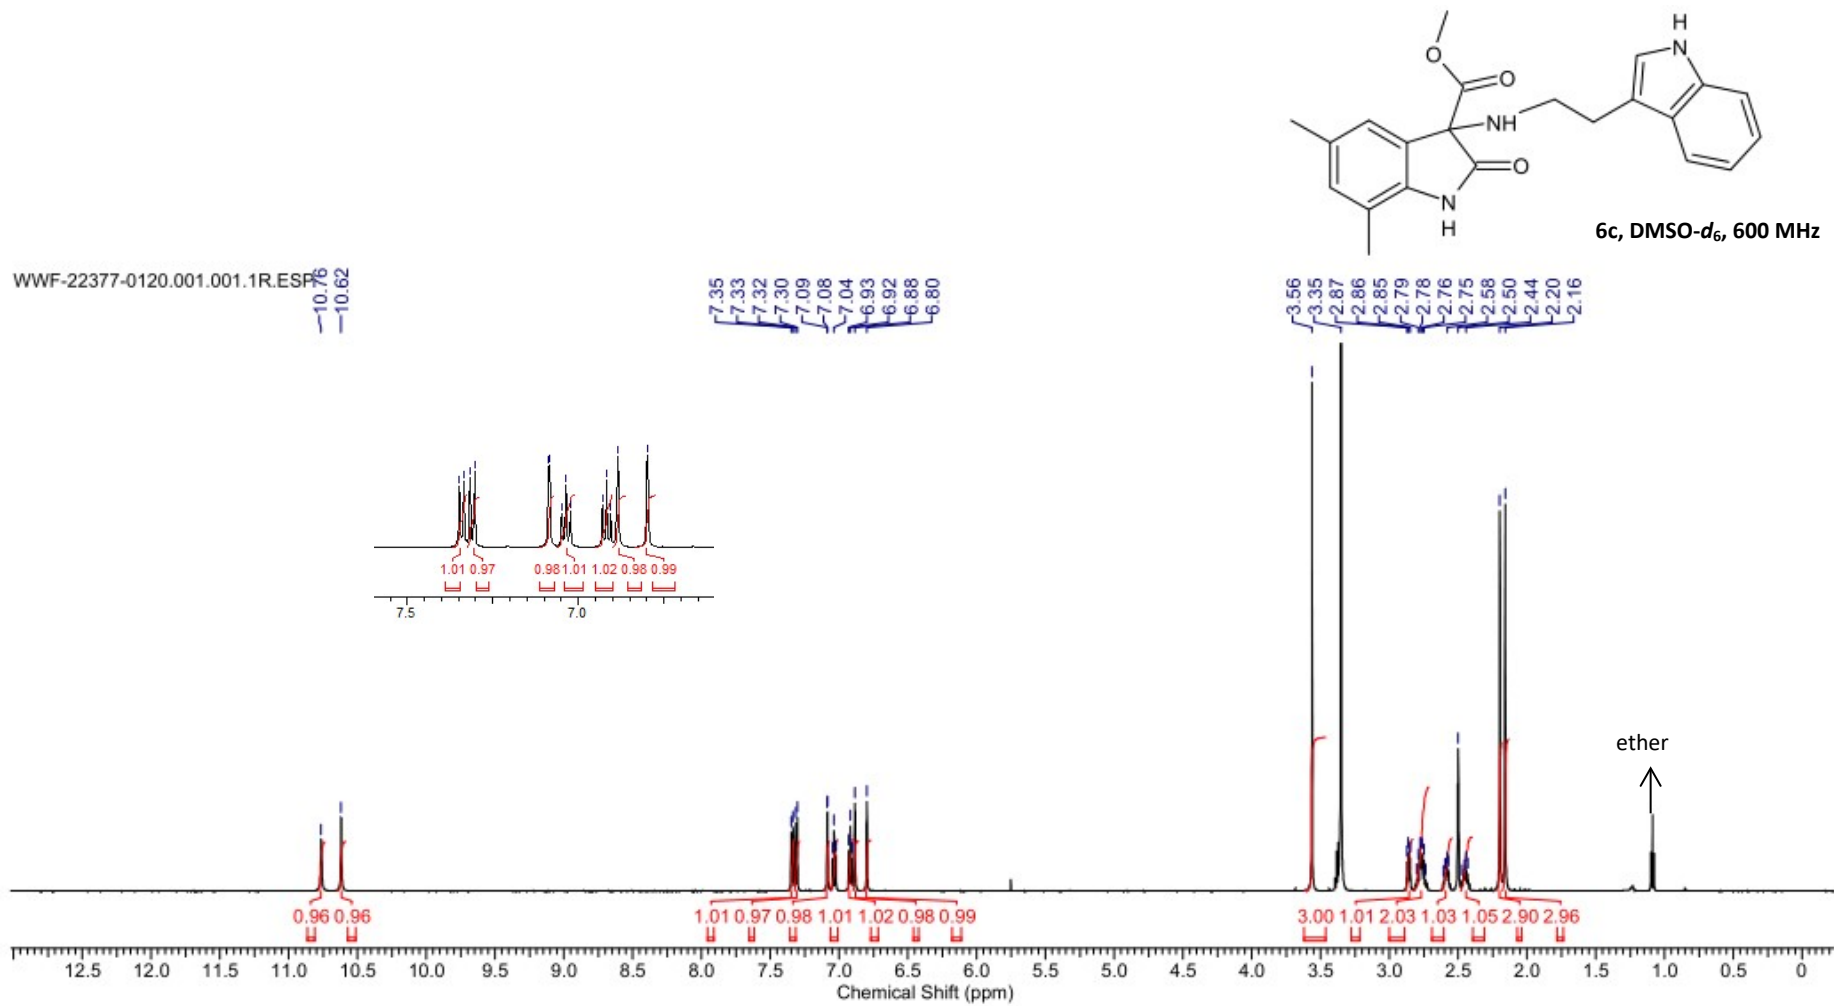

2.001.001.1R.ESP

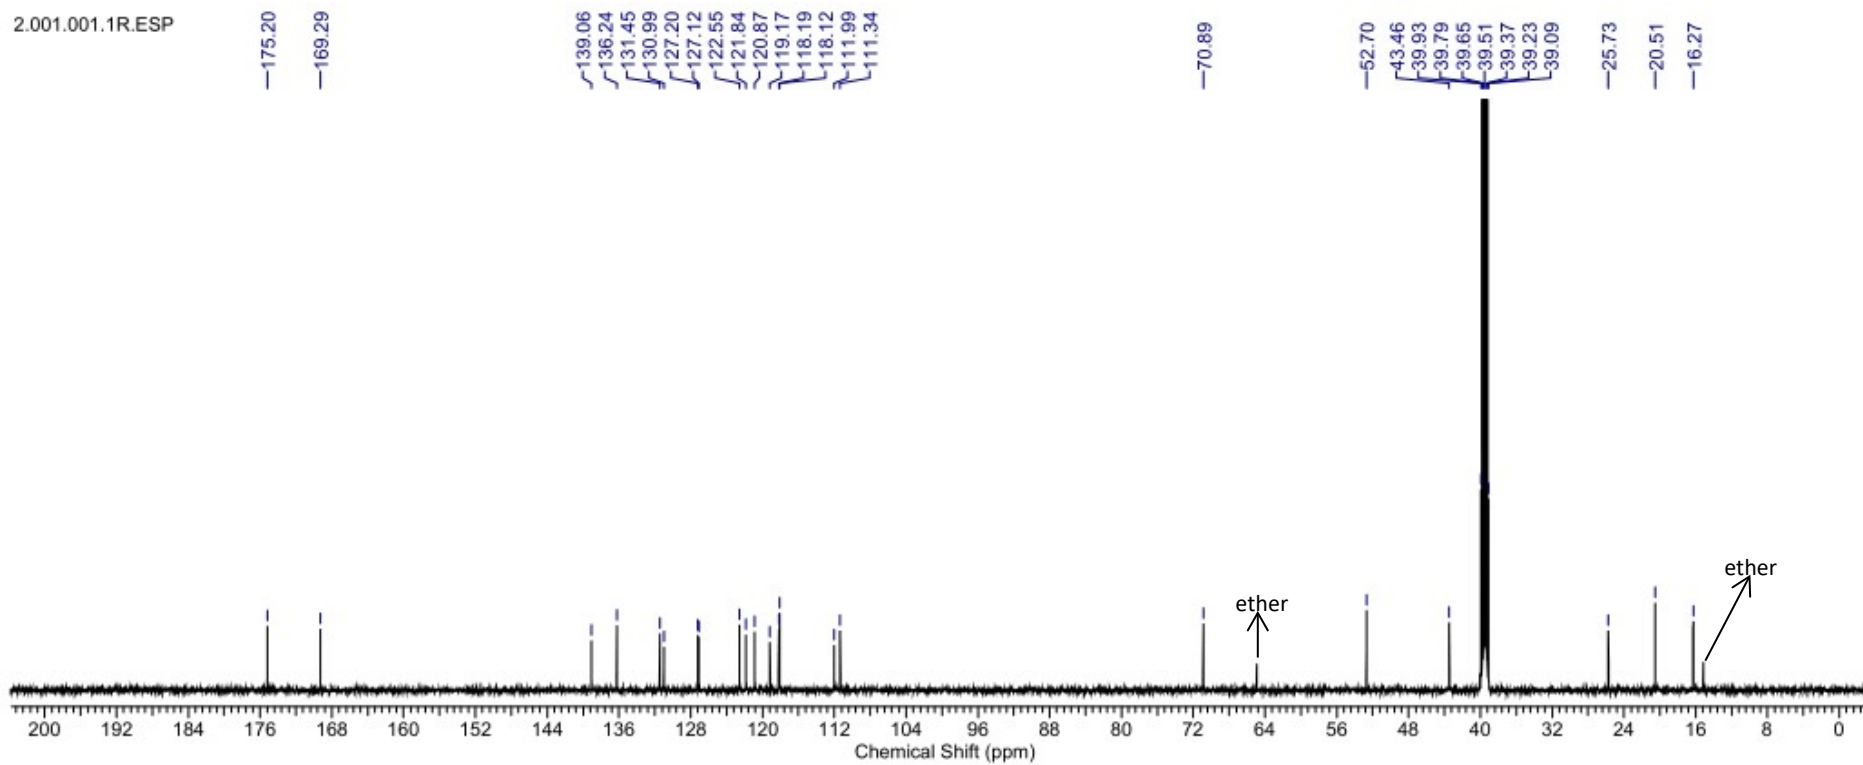

WWF-22377 #22 RT: 0.10 AV: 1 NL: 5.37E9

T: FTMS + p ESI Full ms [100.0000-1500.0000]

400.16275  
 $C_{22}H_{23}O_3N_3Na = 400.16316$   
-1.03095 ppm

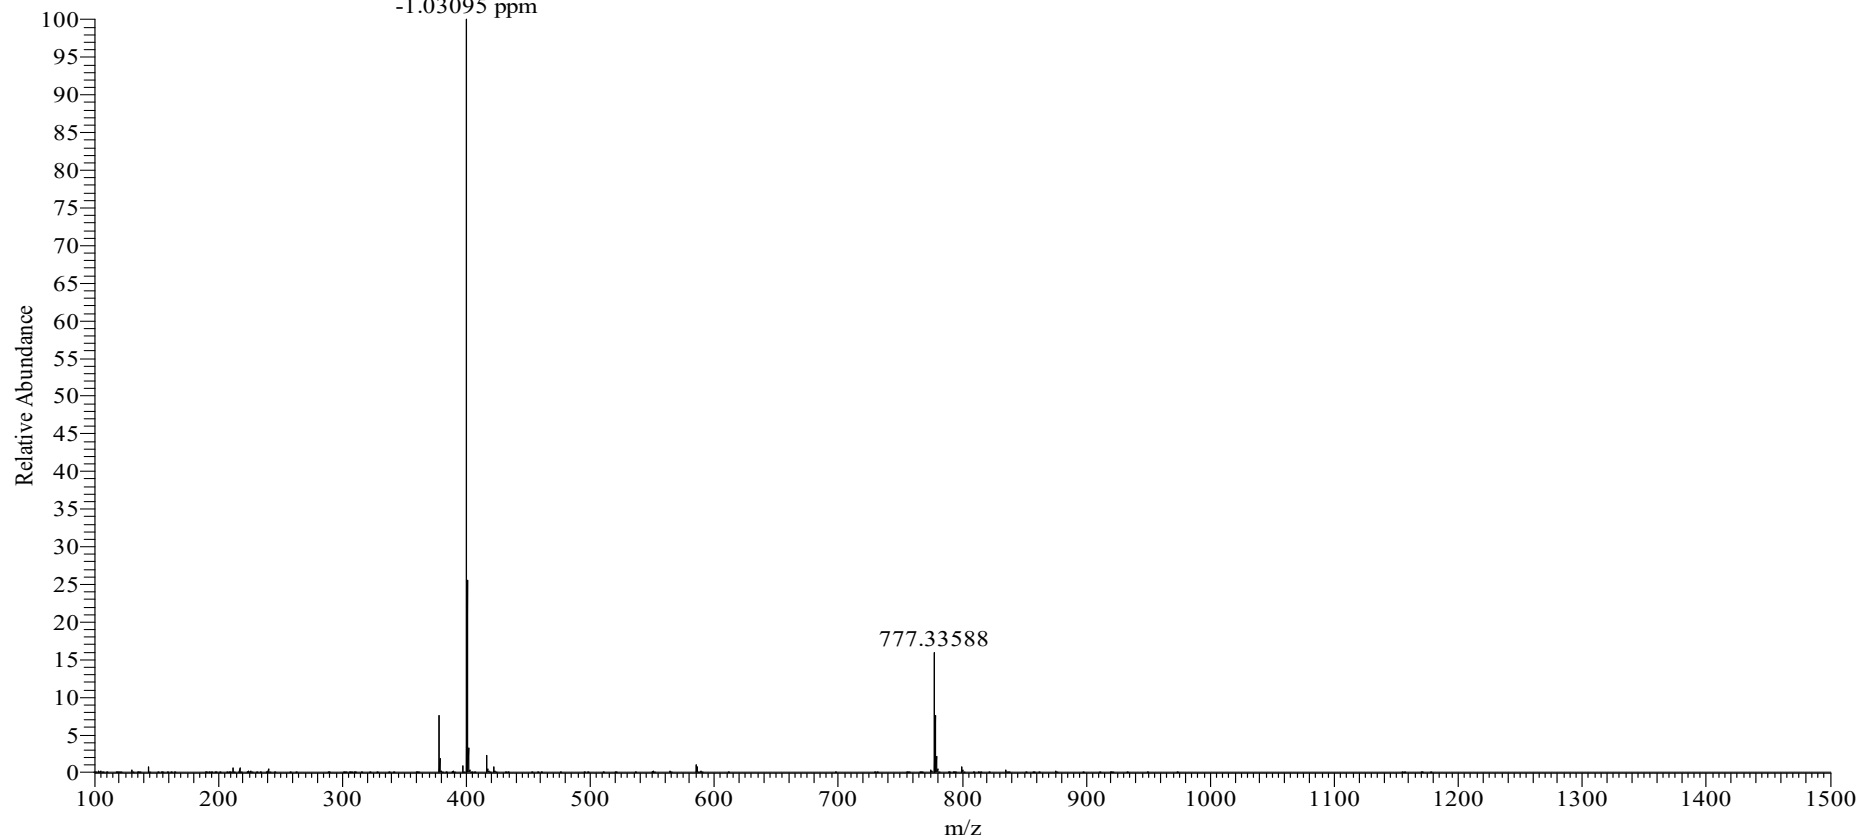



WWF-21383.001.001.1R.ESP

10.84  
10.77

7.37  
7.36  
7.34  
7.32  
7.26  
7.26  
7.10  
7.04  
6.93  
6.89  
6.88

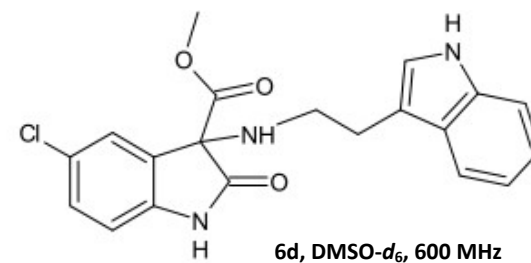

3.60  
3.36  
3.35  
3.34  
3.33  
3.09  
3.08  
2.80  
2.78  
2.60  
2.50  
2.50  
2.49  
2.46

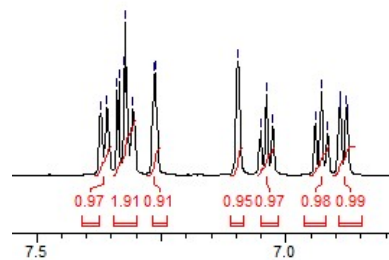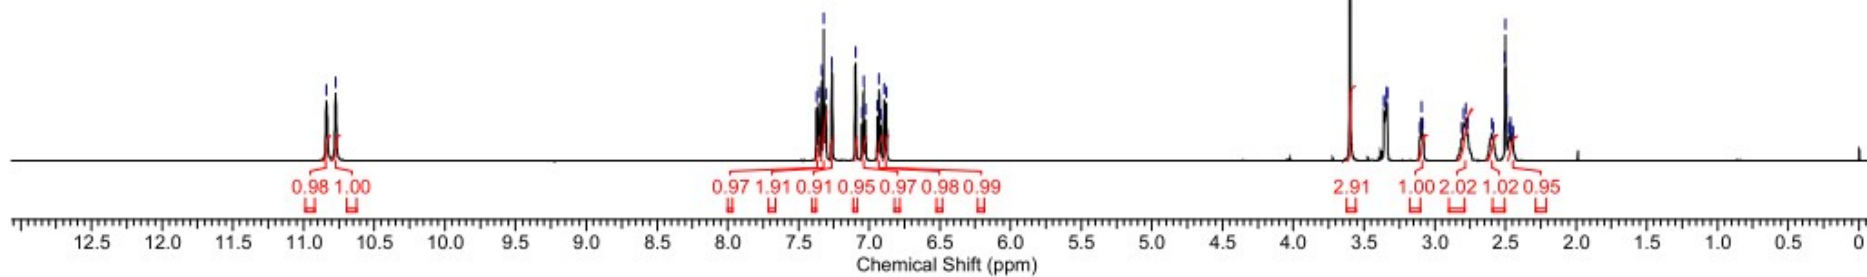

WWF-21383.002.001.1R.ESP

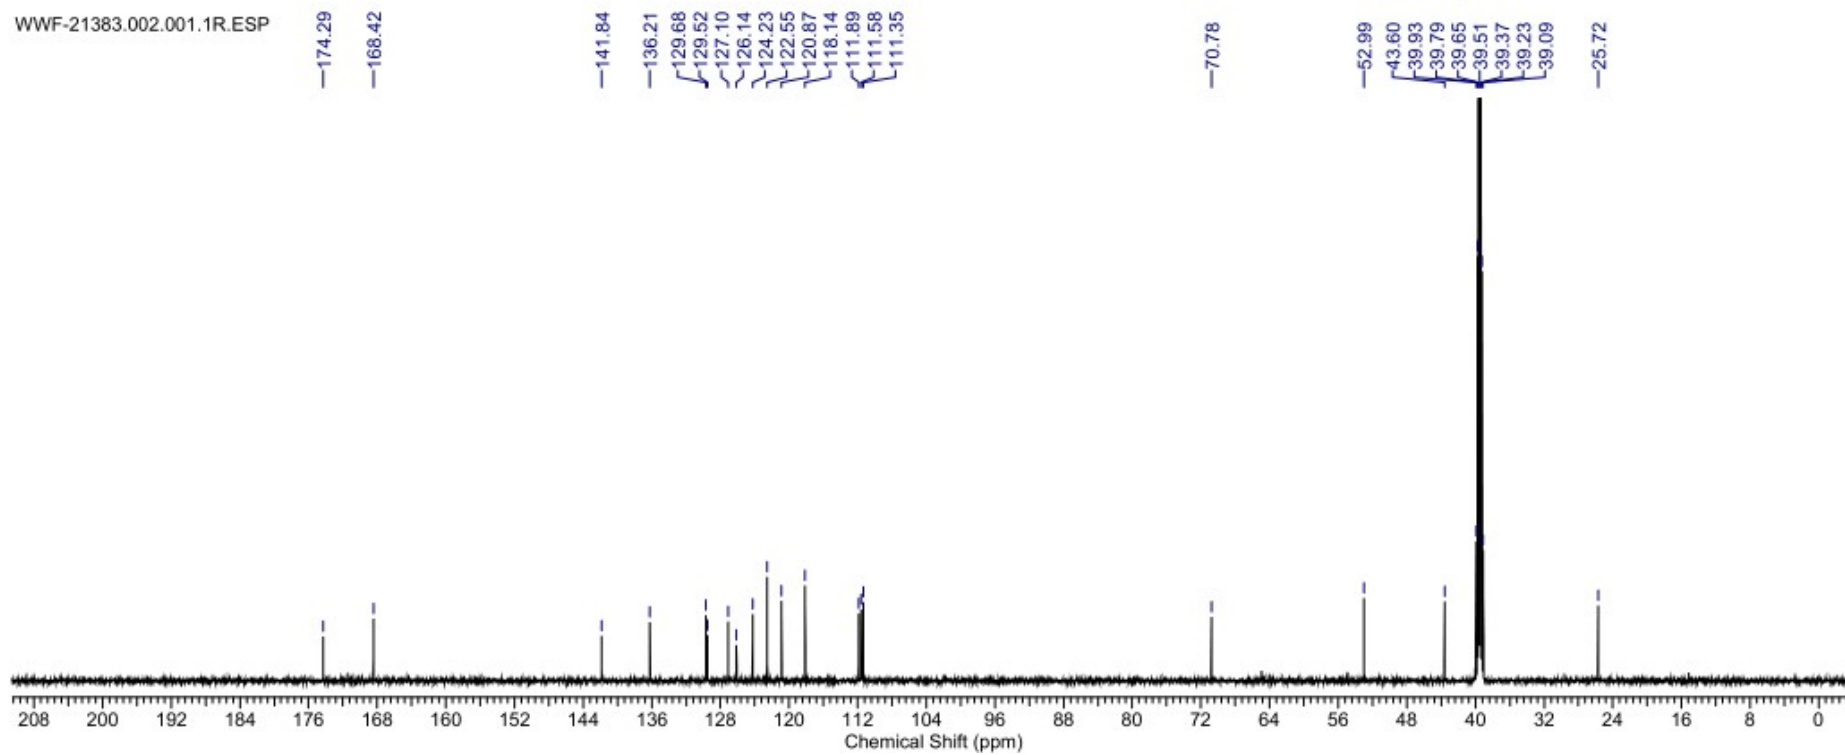

WWF-22384 #23 RT: 0.10 AV: 1 NL: 3.85E9

T: FTMS + p ESI Full ms [100.0000-1500.0000]

406.09241

$C_{20}H_{18}O_3N_3ClNa = 406.09289$

-1.18966 ppm

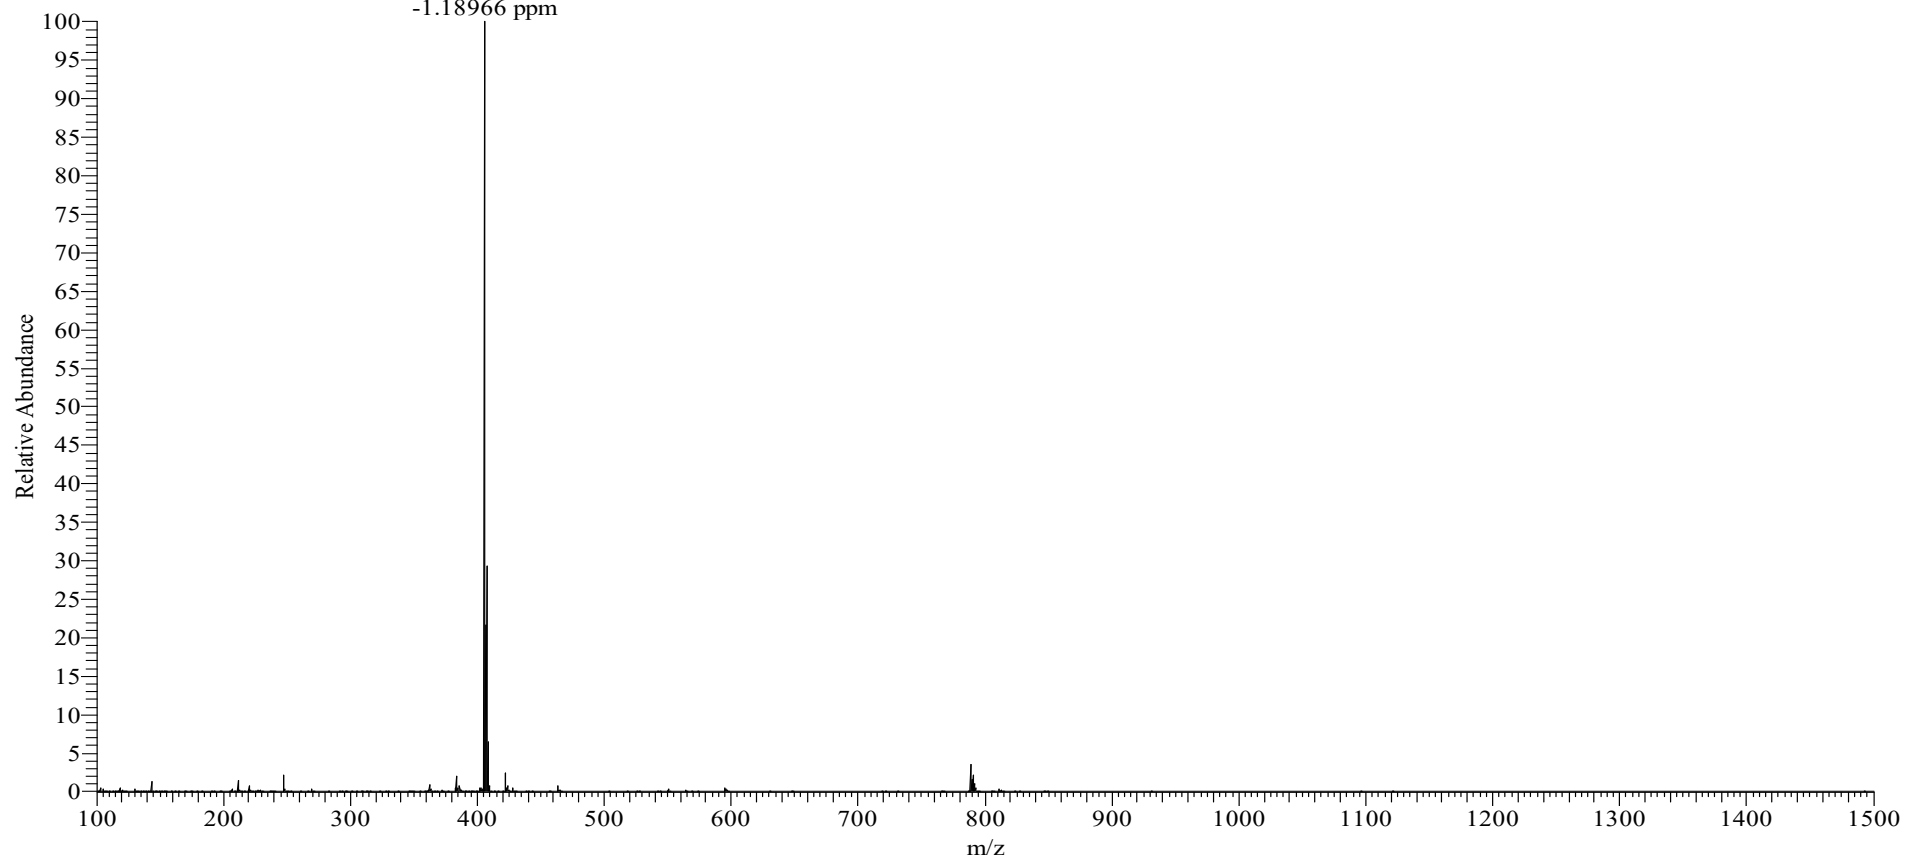

WWF-21429.001.001.1R.ESP

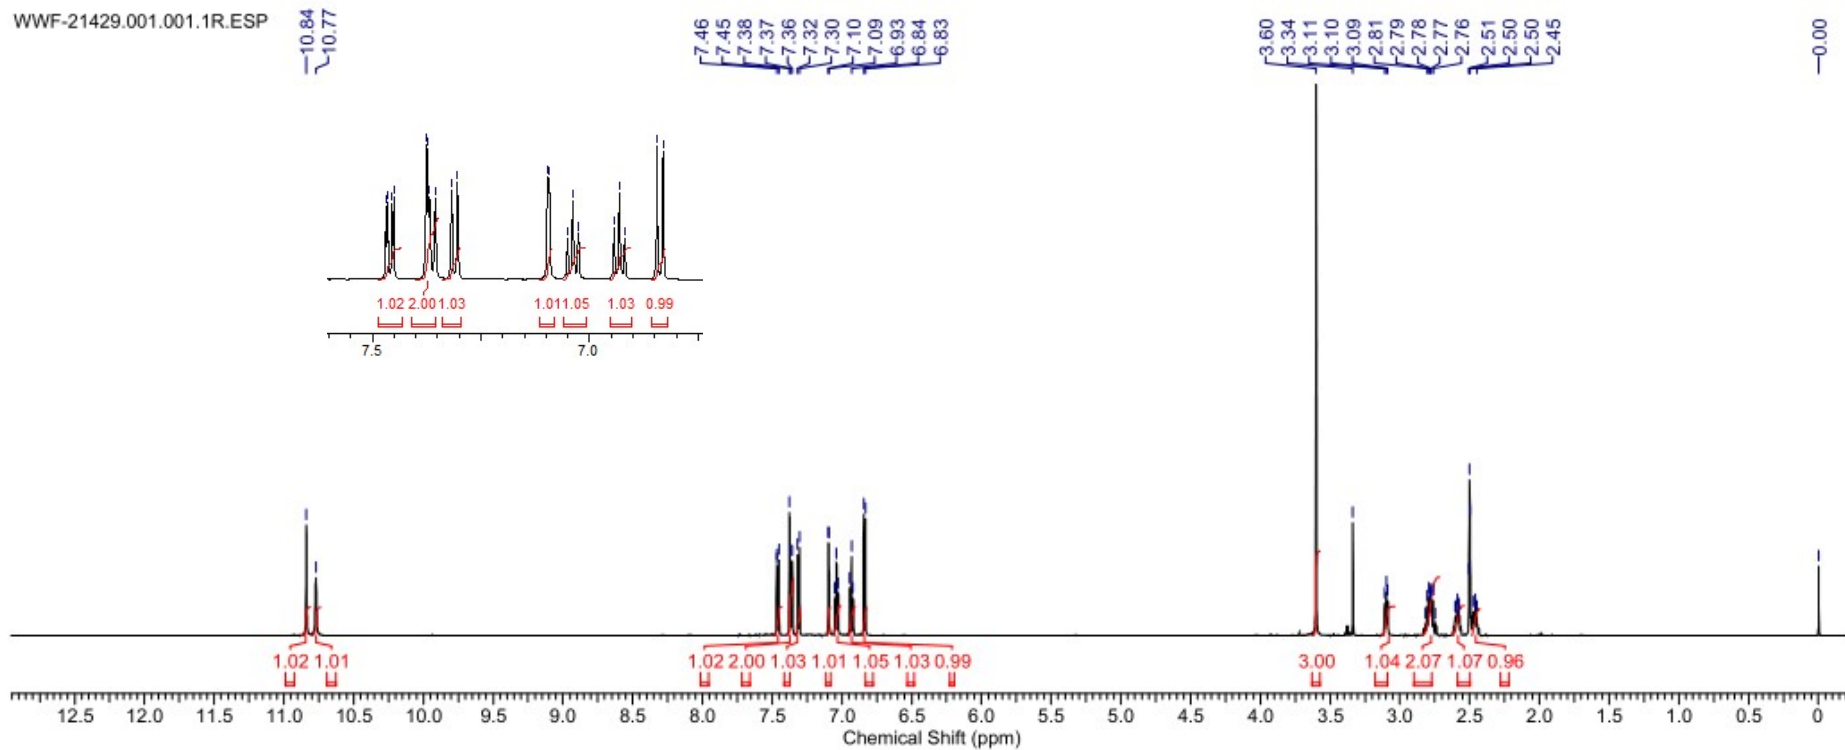

WWF-21429.002.001.1R.ESP

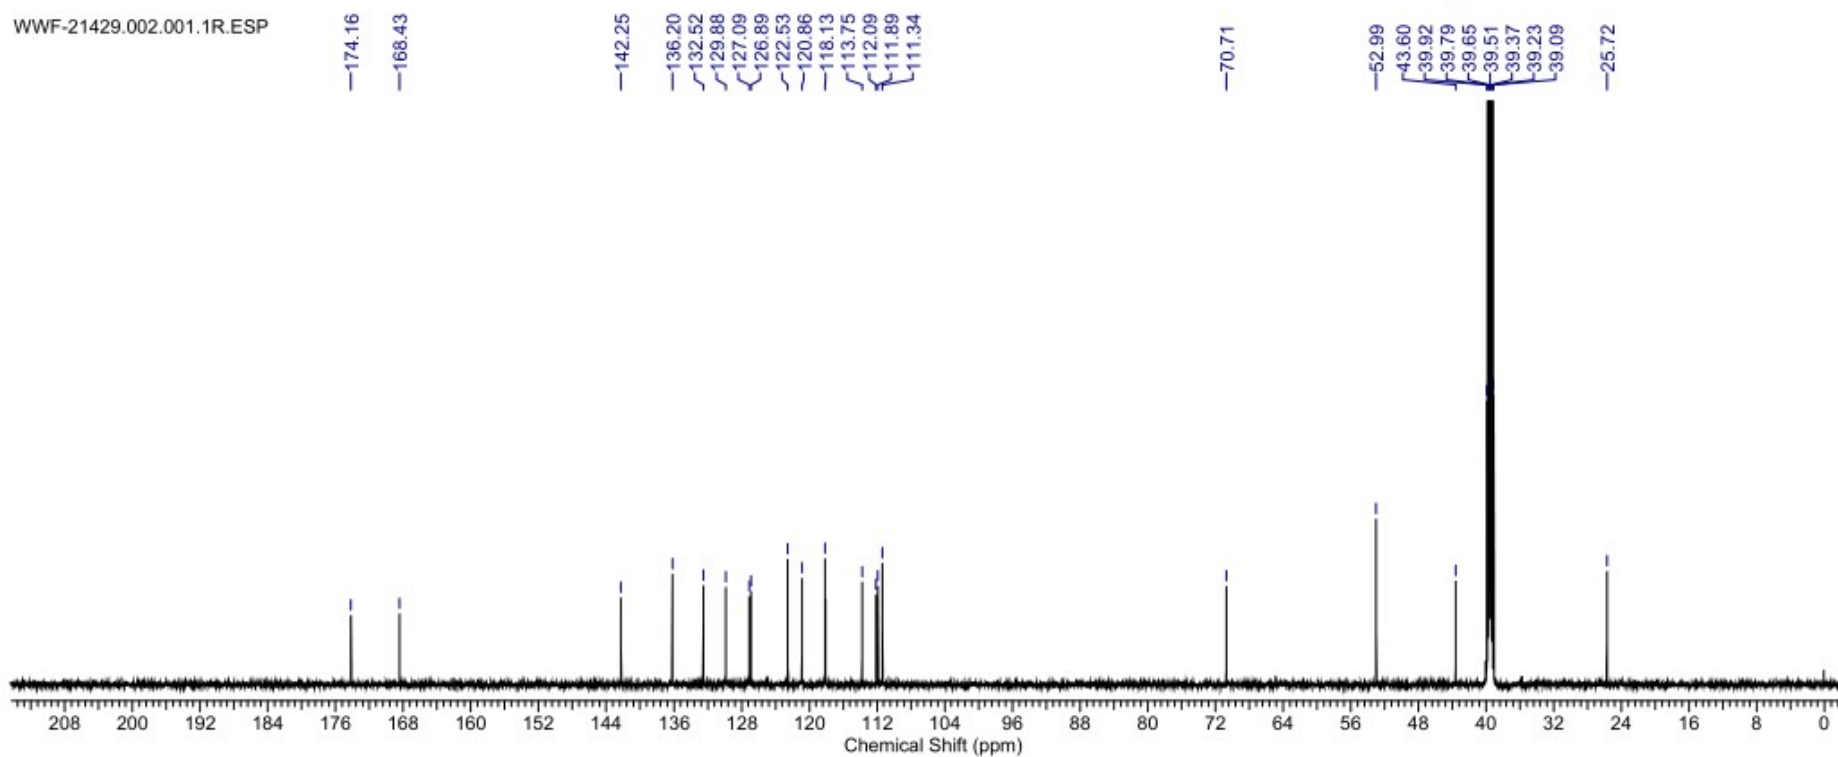

WWF-22429-5 #39 RT: 0.17 AV: 1 NL: 7.58E7  
T: FTMS + p ESI Full ms [100.0000-1500.0000]

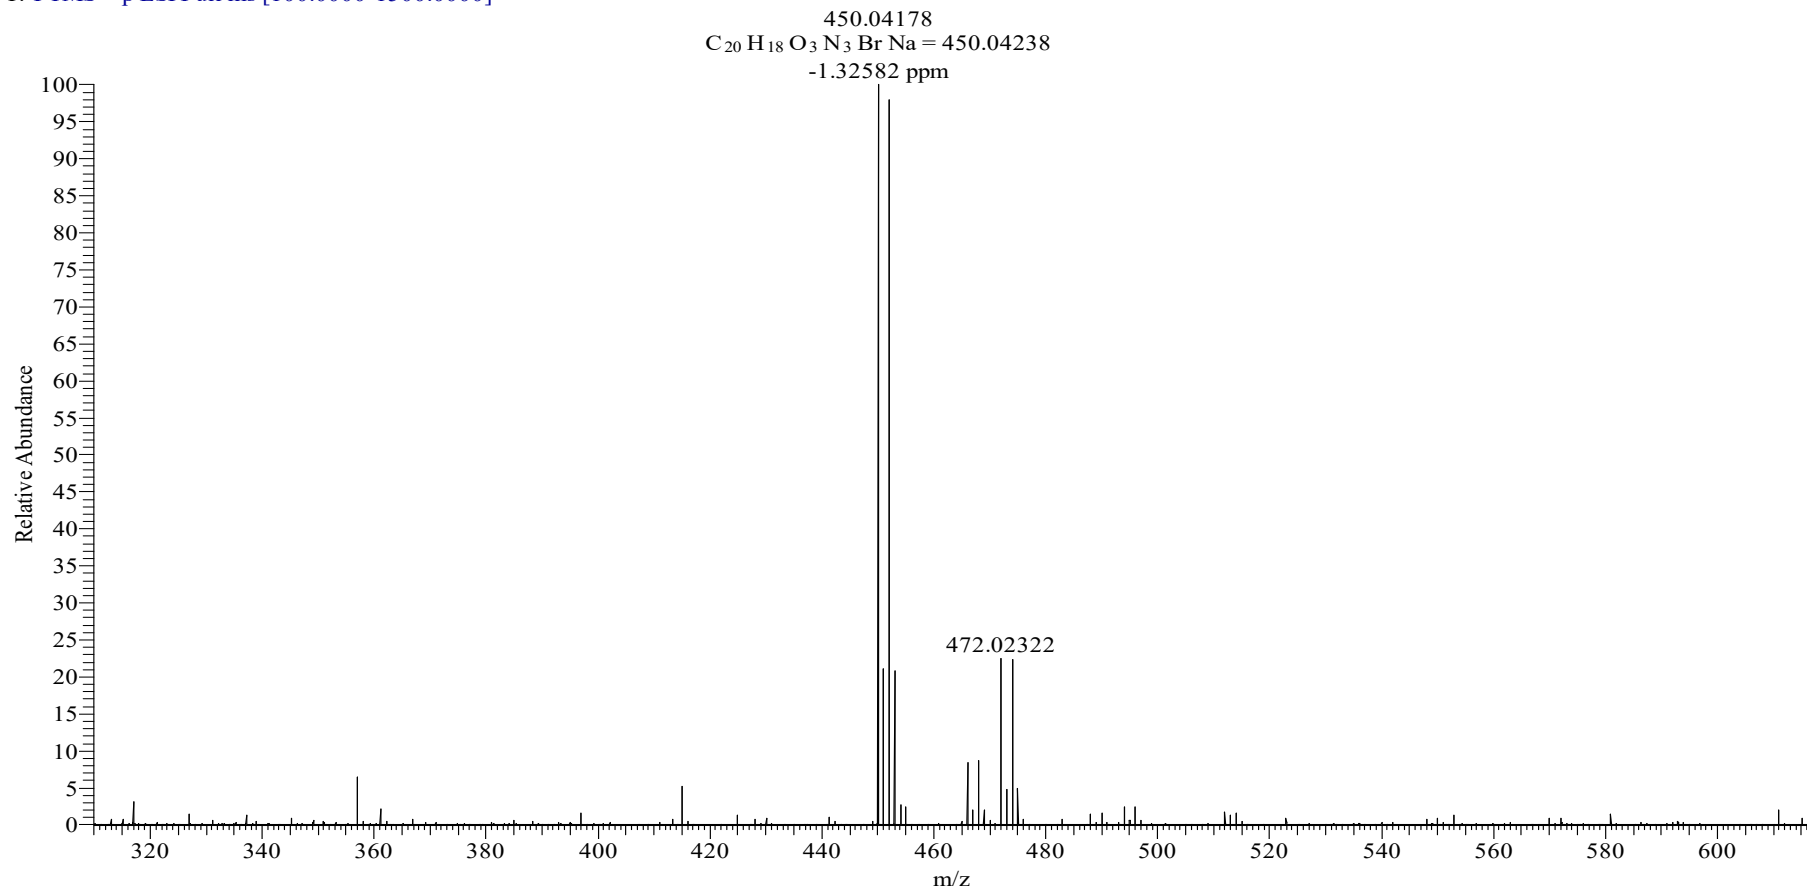

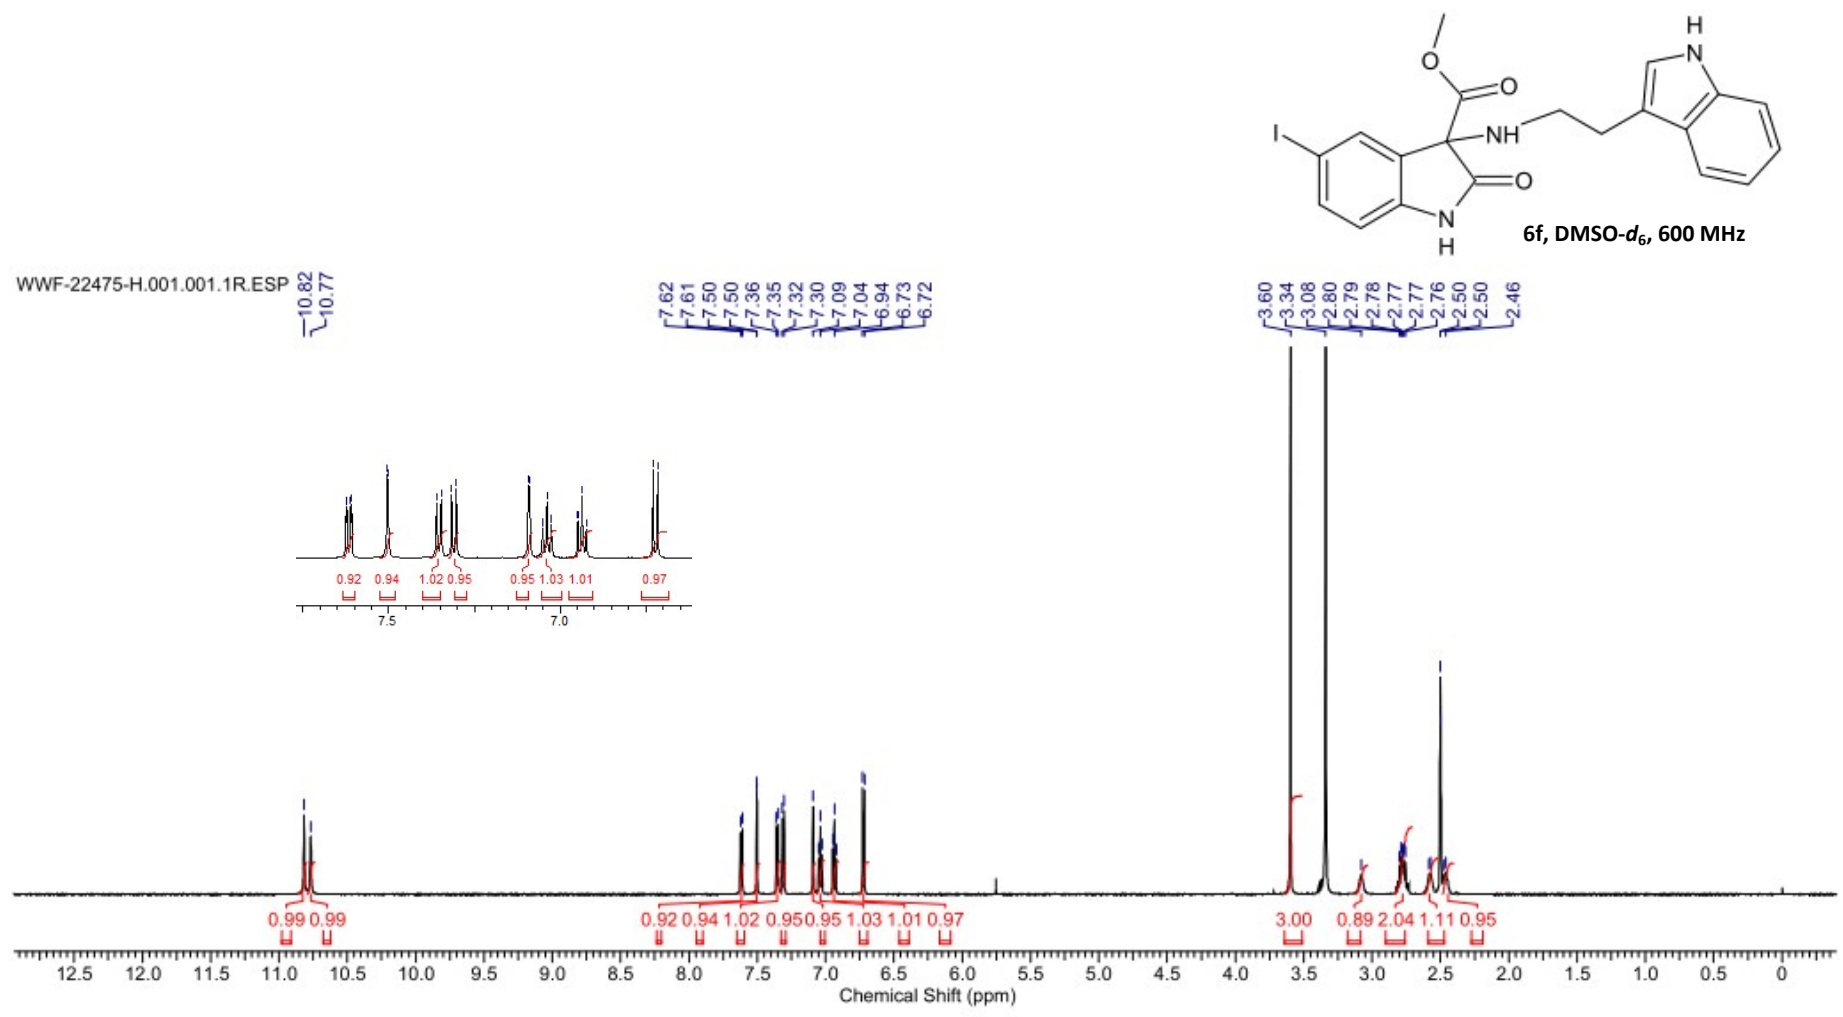

WWF-22475.002.001.1R.ESP

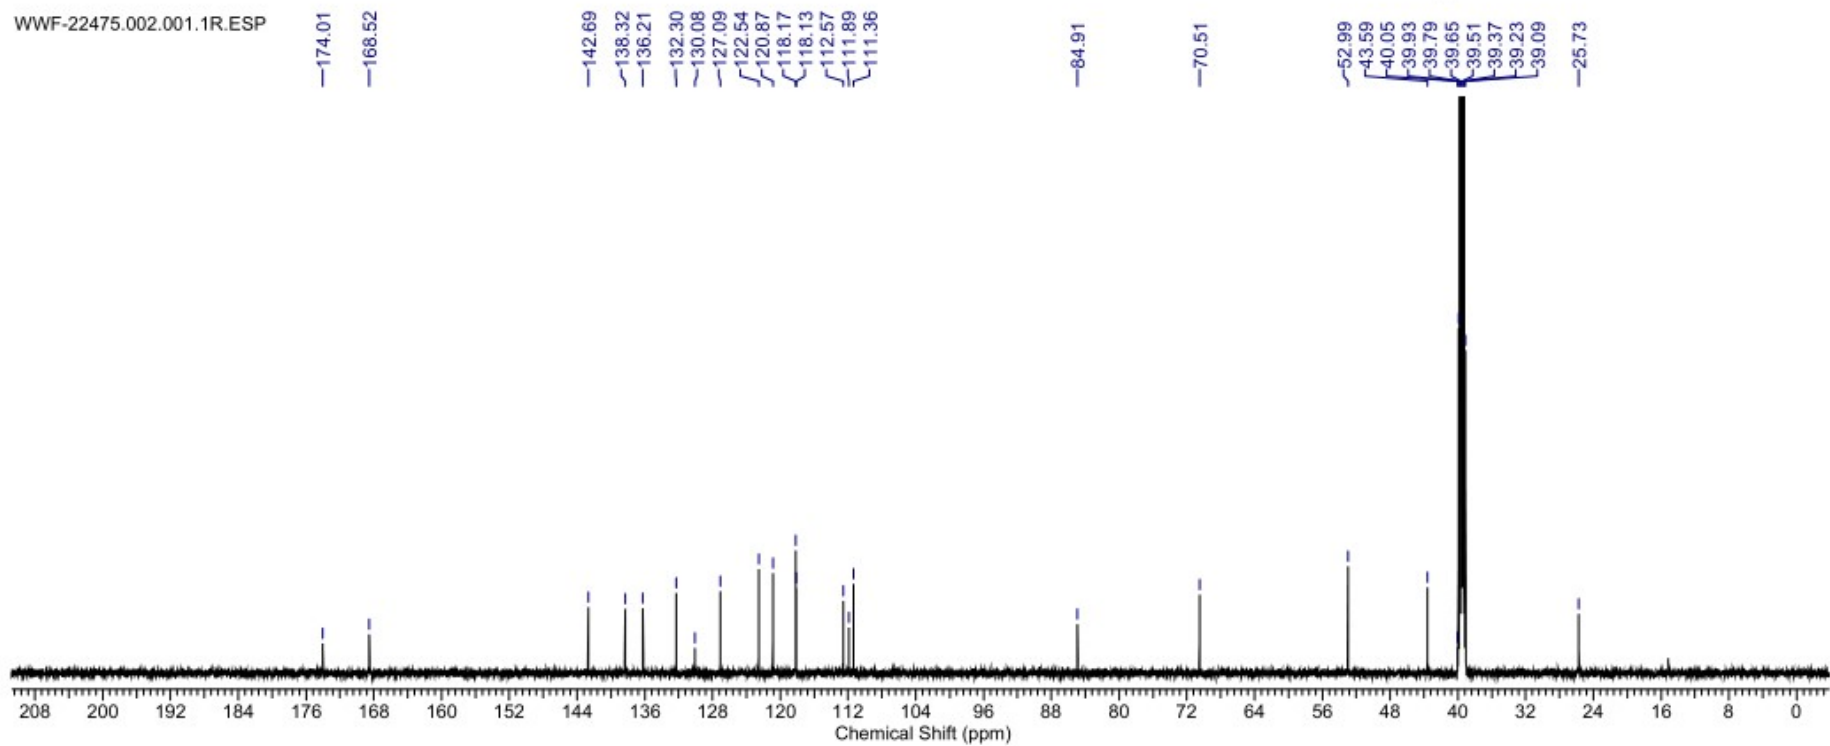



WWF-22475 #22 RT: 0.10 AV: 1 NL: 3.15E9  
T: FTMS + p ESI Full ms [100.0000-1500.0000]

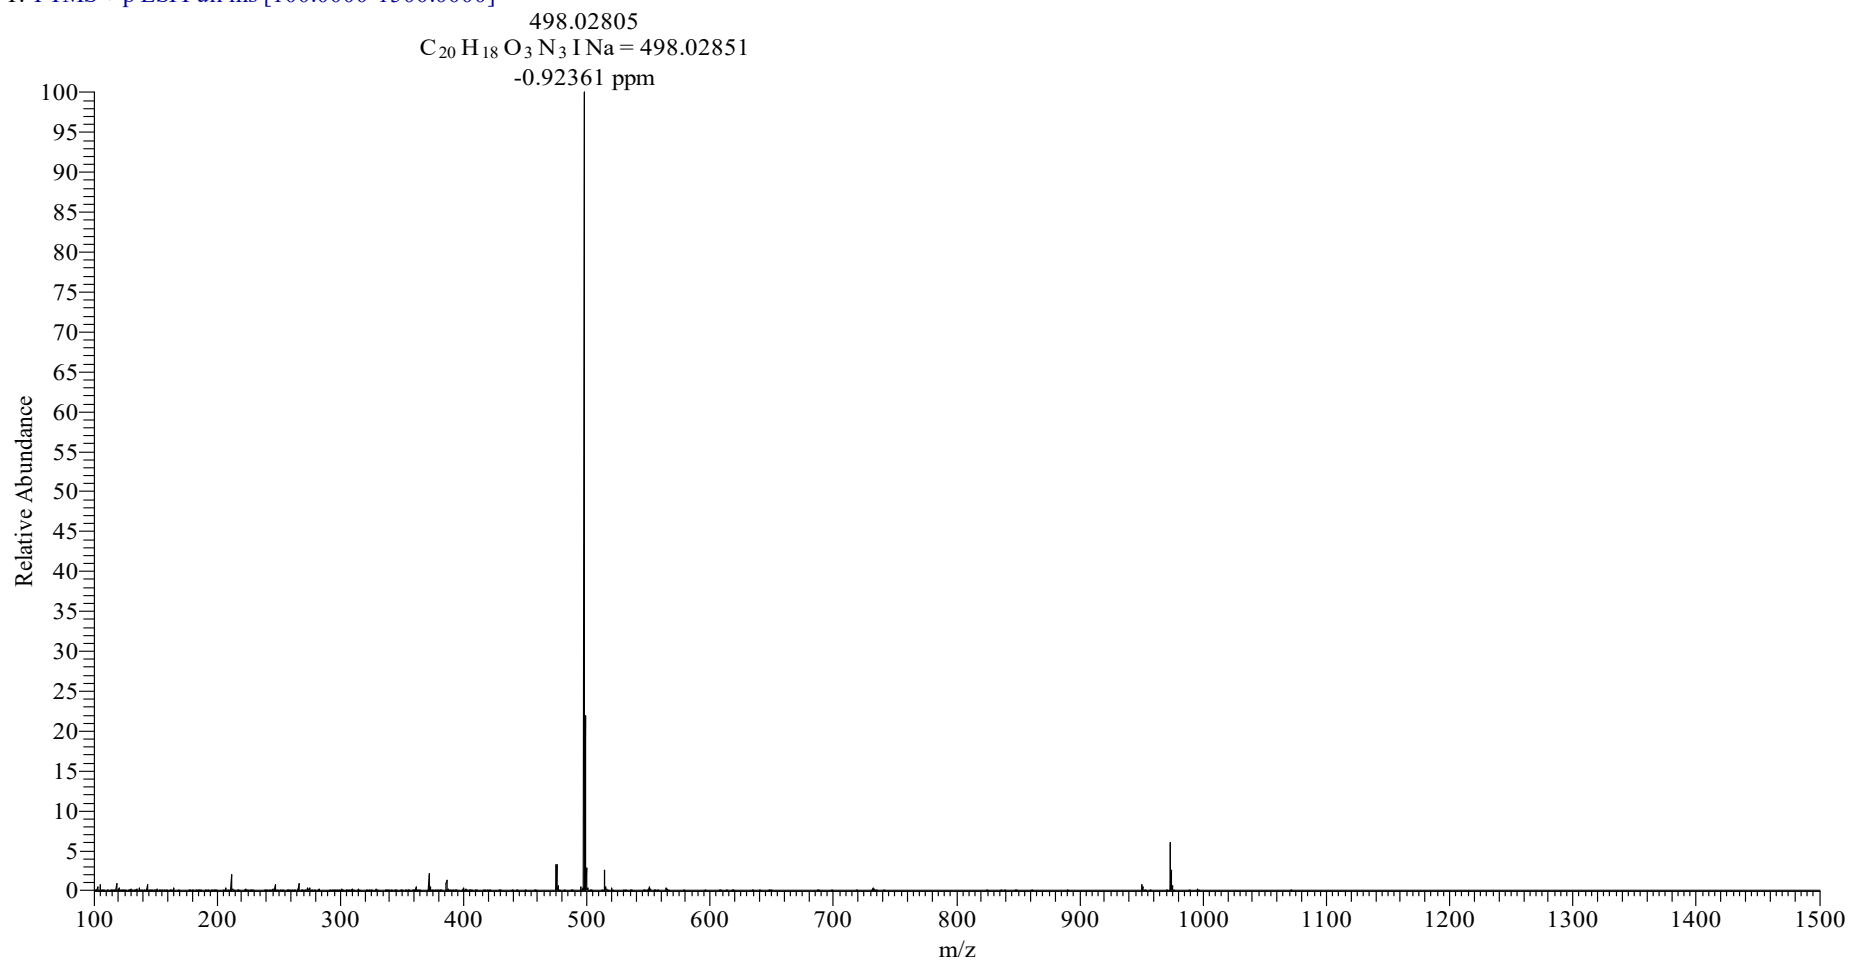

XDL-394.001.001.1R.ESP

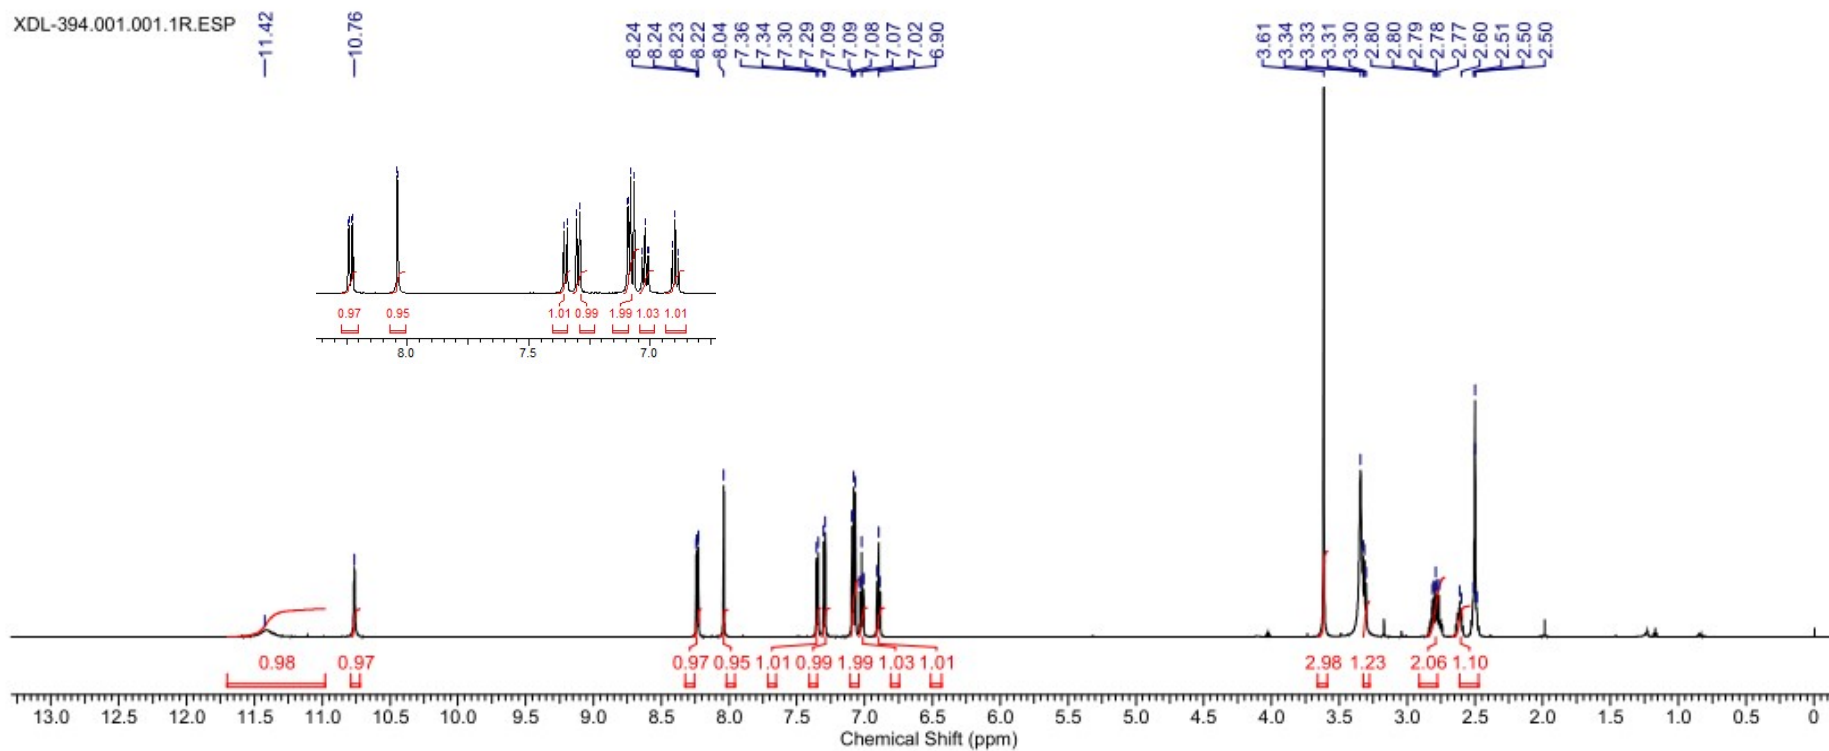

XDL-394.002.001.1R.ESP

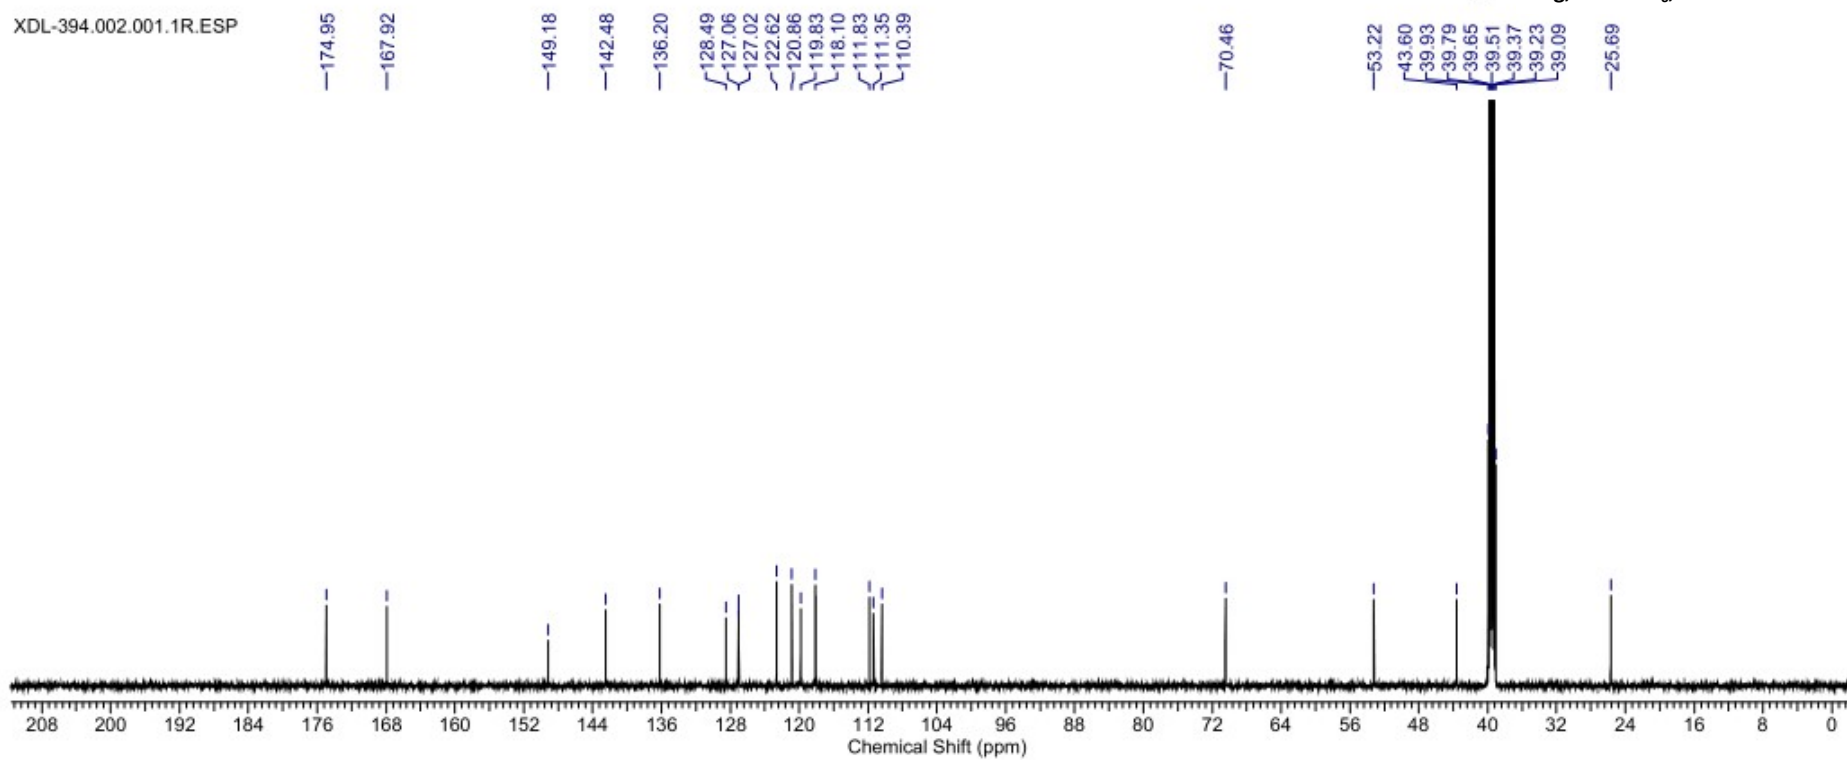

XDL-21394 #23 RT: 0.10 AV: 1 NL: 1.42E9  
T: FTMS + p ESI Full ms [100.0000-1500.0000]

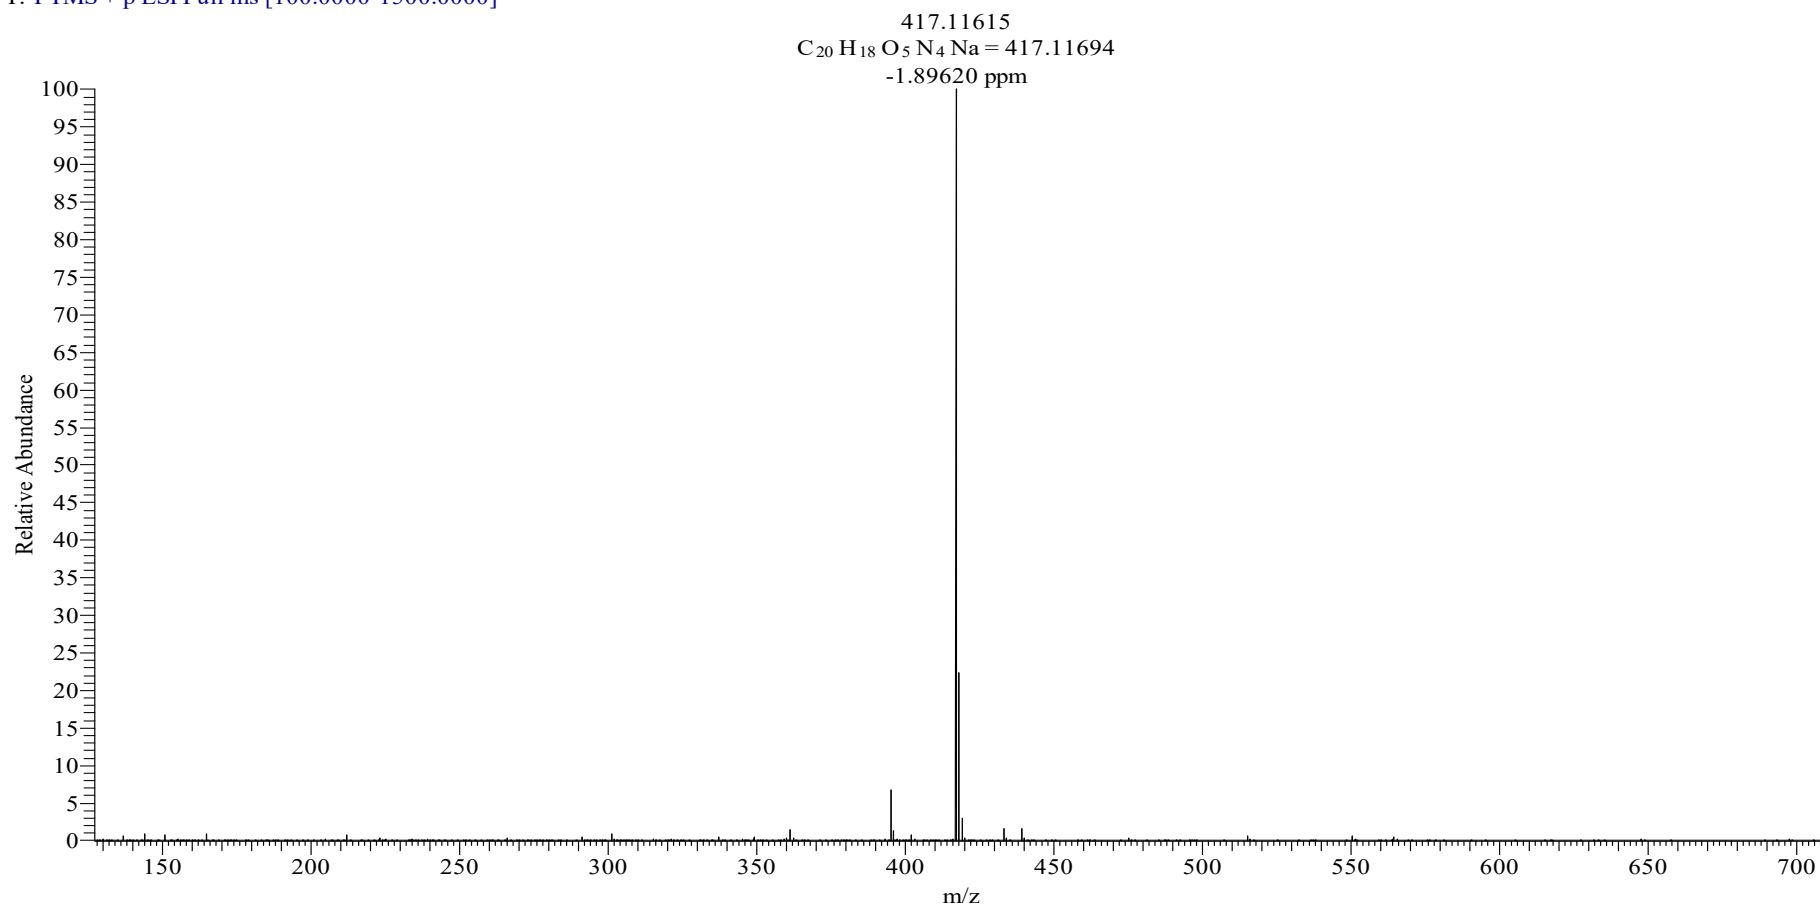

WWF-20379.001.001.1R.ESP

10.69  
10.60

7.26  
7.21  
7.20  
7.19  
7.04  
6.99  
6.88  
6.86  
6.85  
6.70

3.72  
3.71  
3.60  
3.58  
3.35  
2.97  
2.96  
2.77  
2.76  
2.75  
2.74  
2.73  
2.50  
2.50

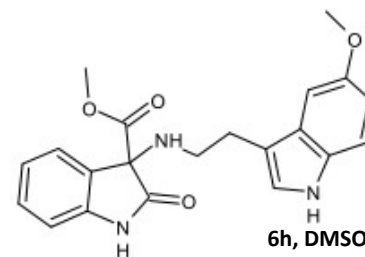

6h, DMSO-d<sub>6</sub>, 600 MHz

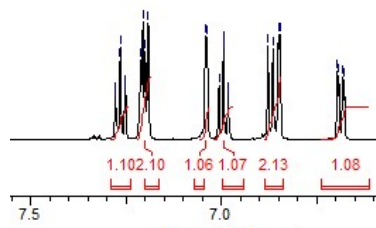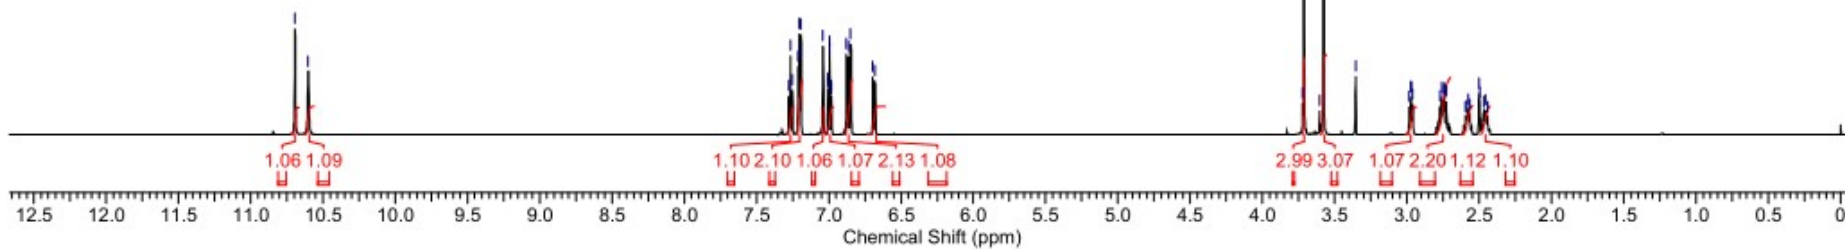

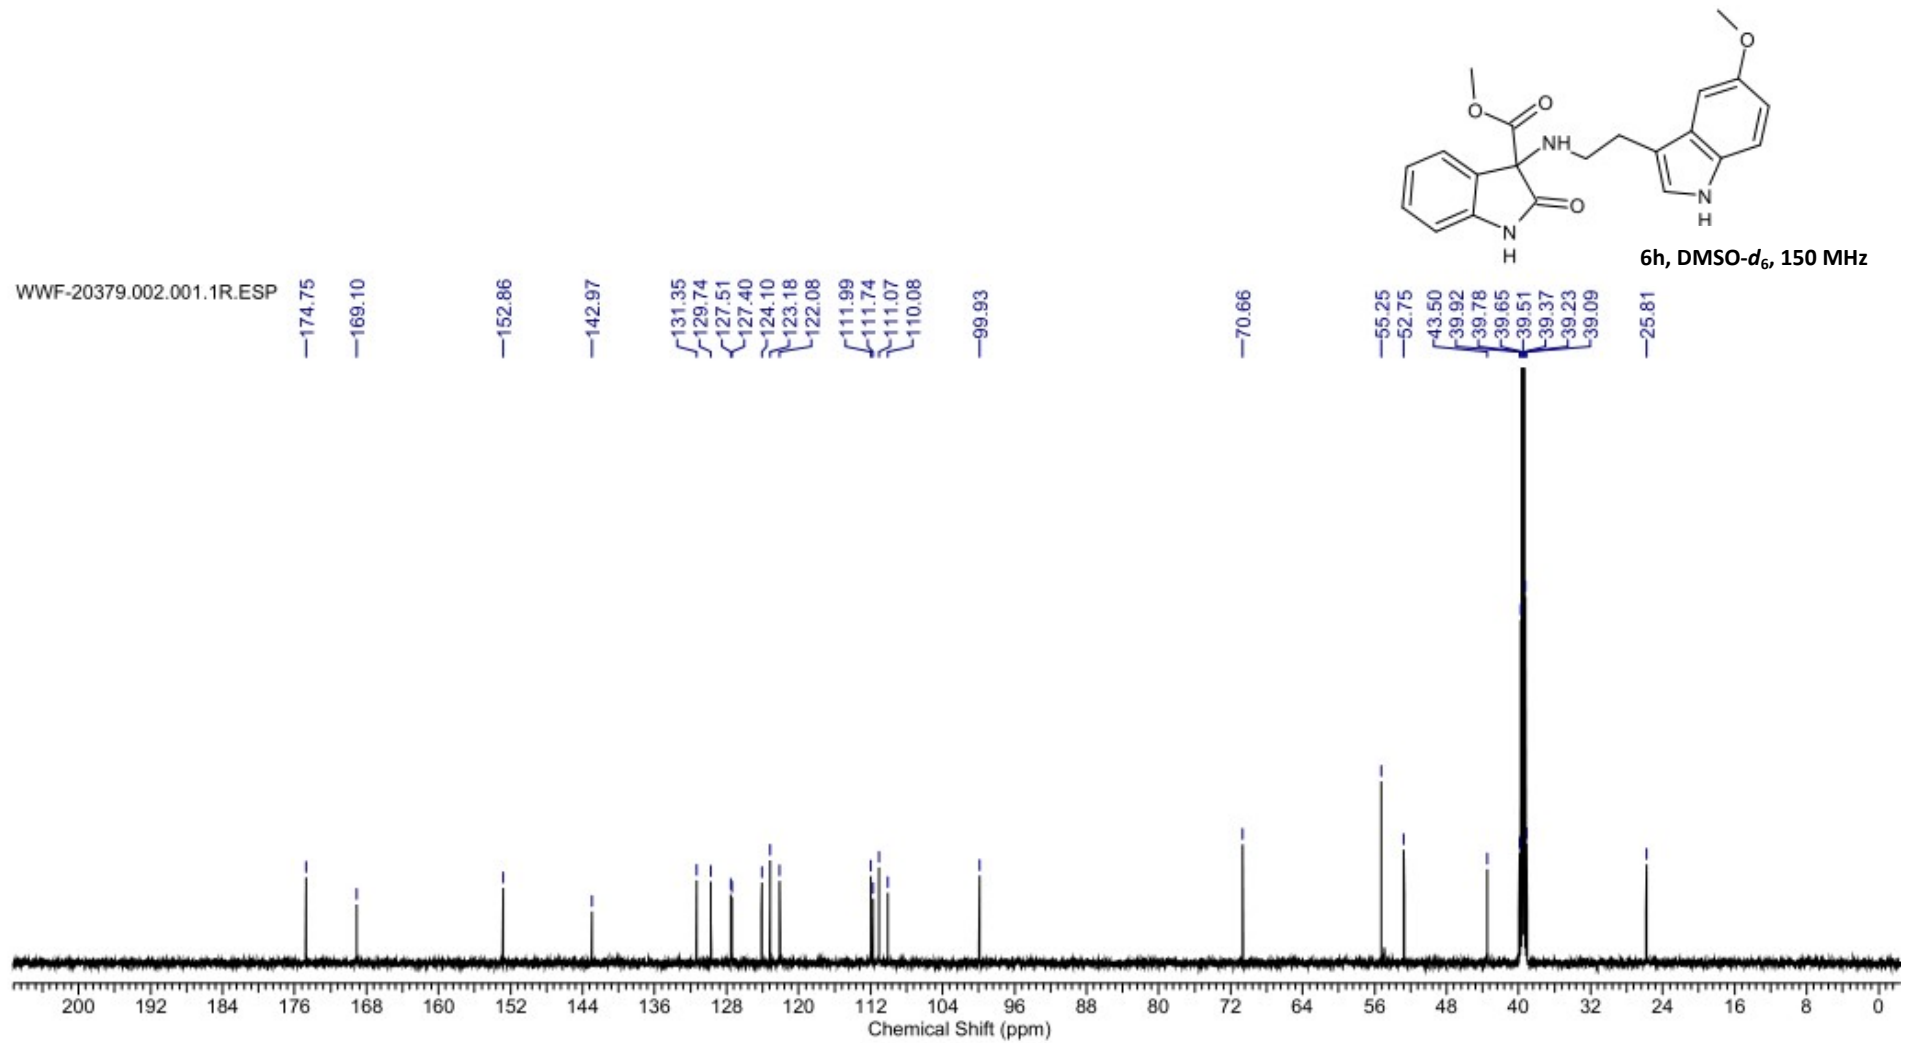

XDL-21379 #29 RT: 0.13 AV: 1 NL: 2.41E8  
T: FTMS + p ESI Full ms [100.0000-1500.0000]

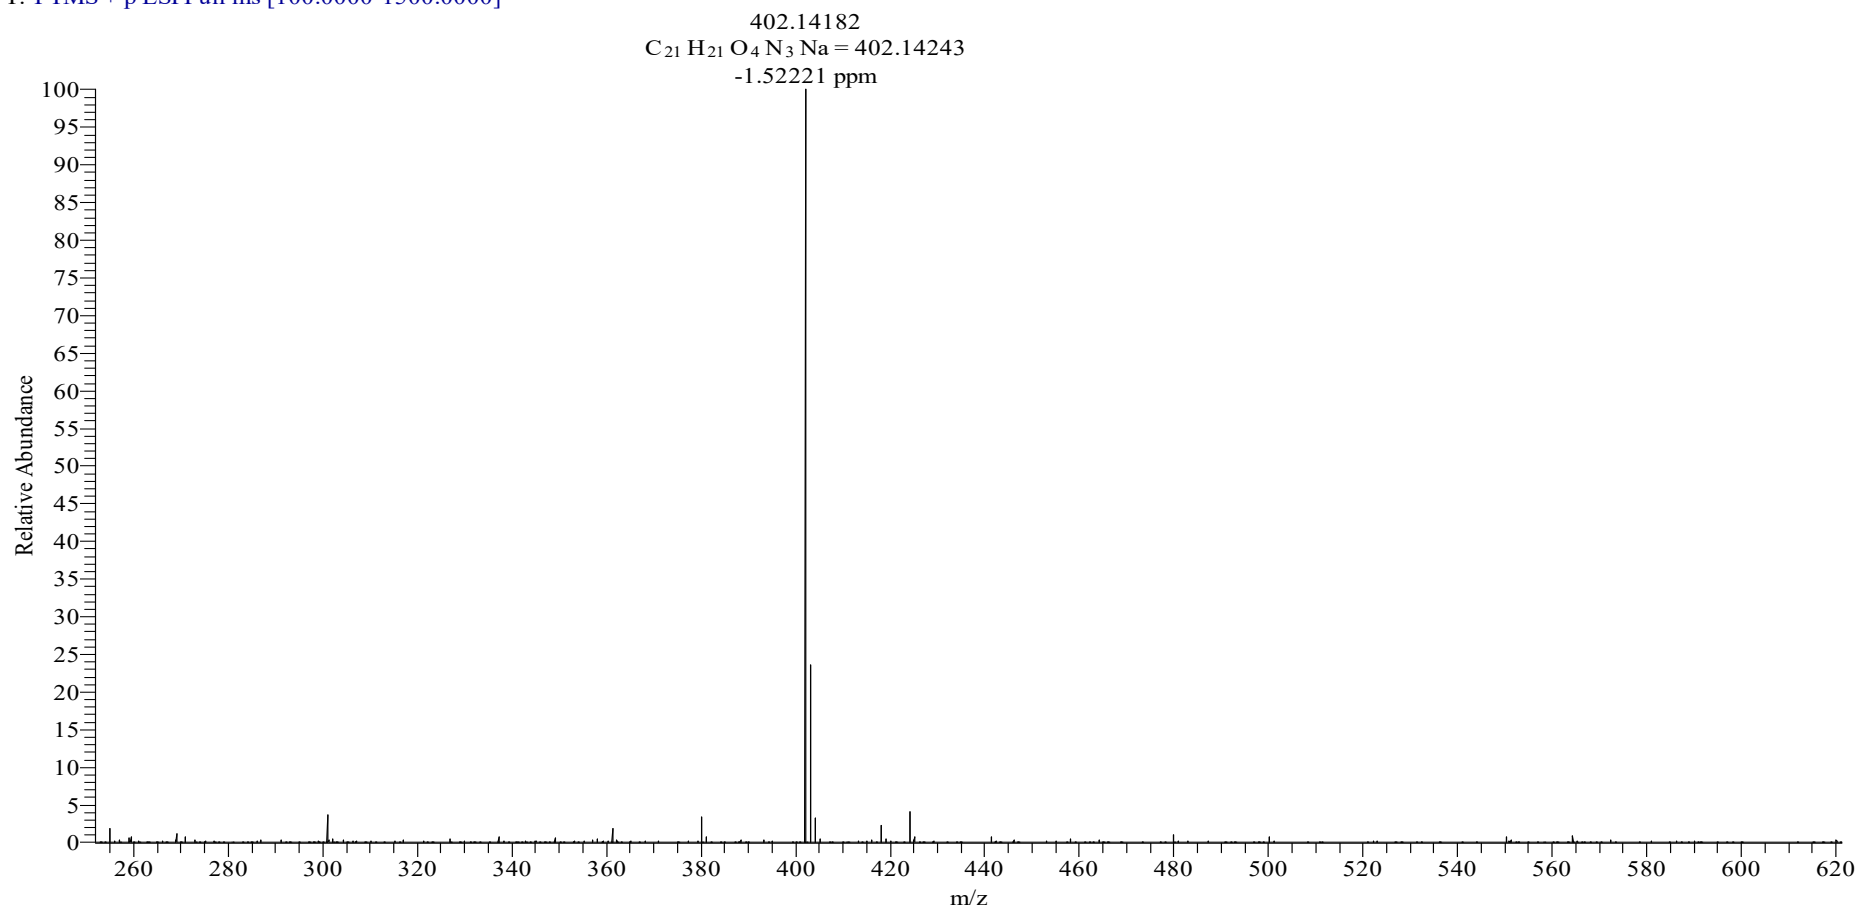

WWF-20384.001.001.1R.ESP

10.98  
10.70

7.38  
7.33  
7.32  
7.27  
7.19  
7.18  
7.17  
7.02  
7.00  
6.88  
6.87

3.57  
3.38  
2.98  
2.78  
2.77  
2.76  
2.75  
2.74  
2.72  
2.57  
2.50  
2.44  
2.43

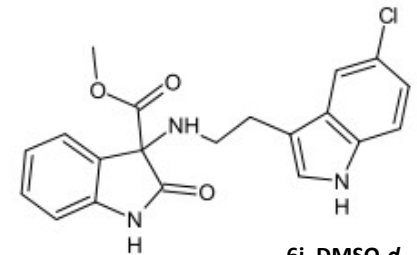

6i, DMSO-d<sub>6</sub>, 600 MHz

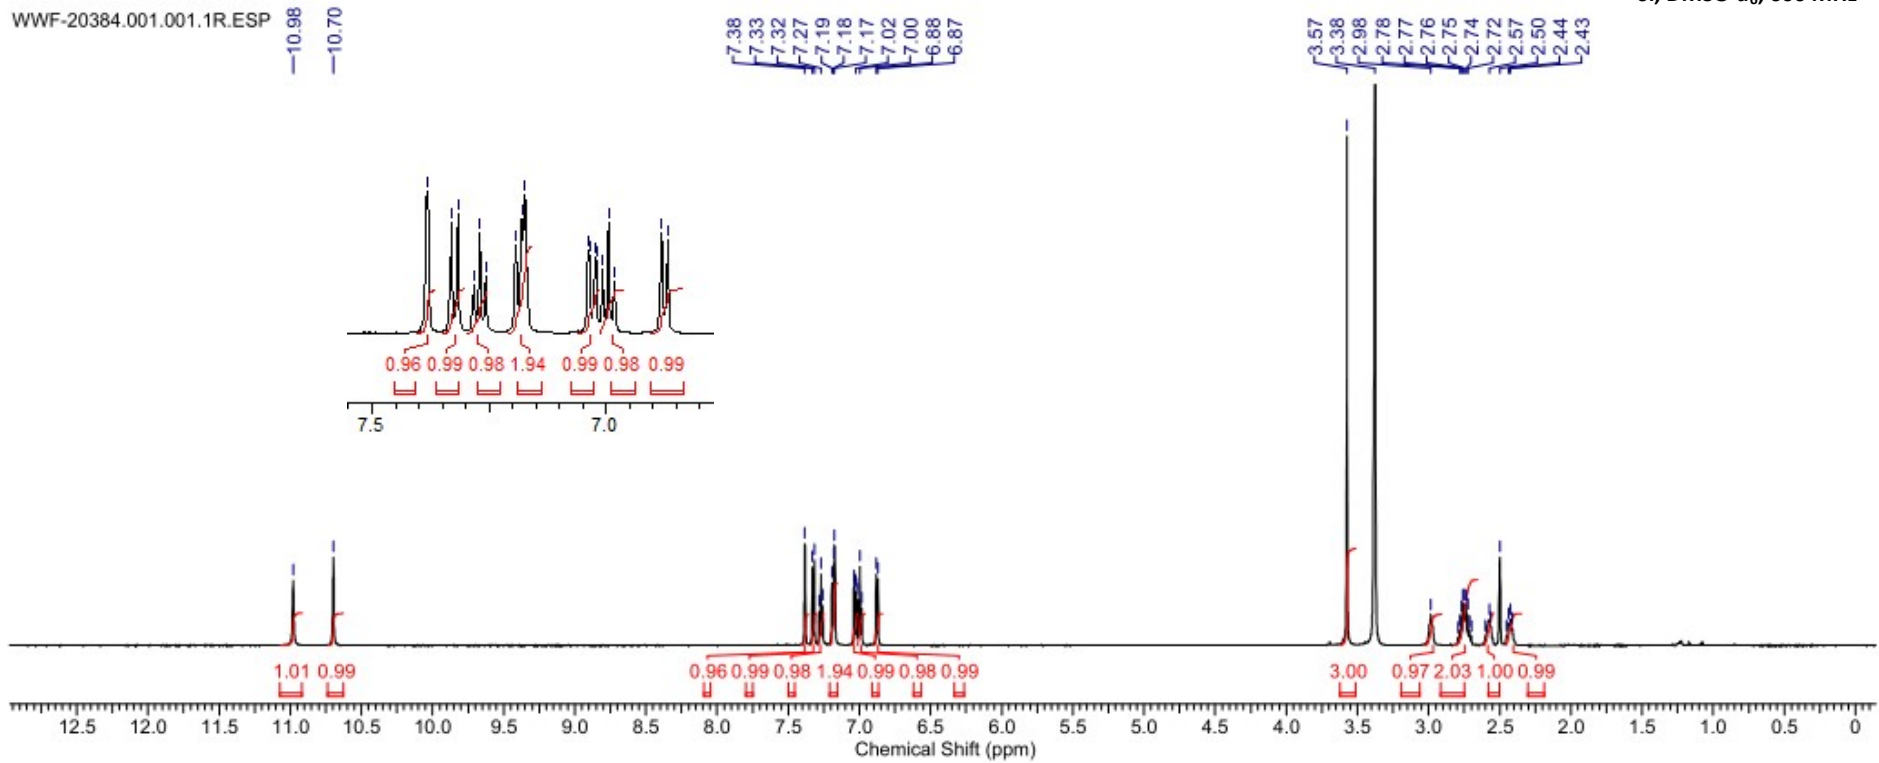



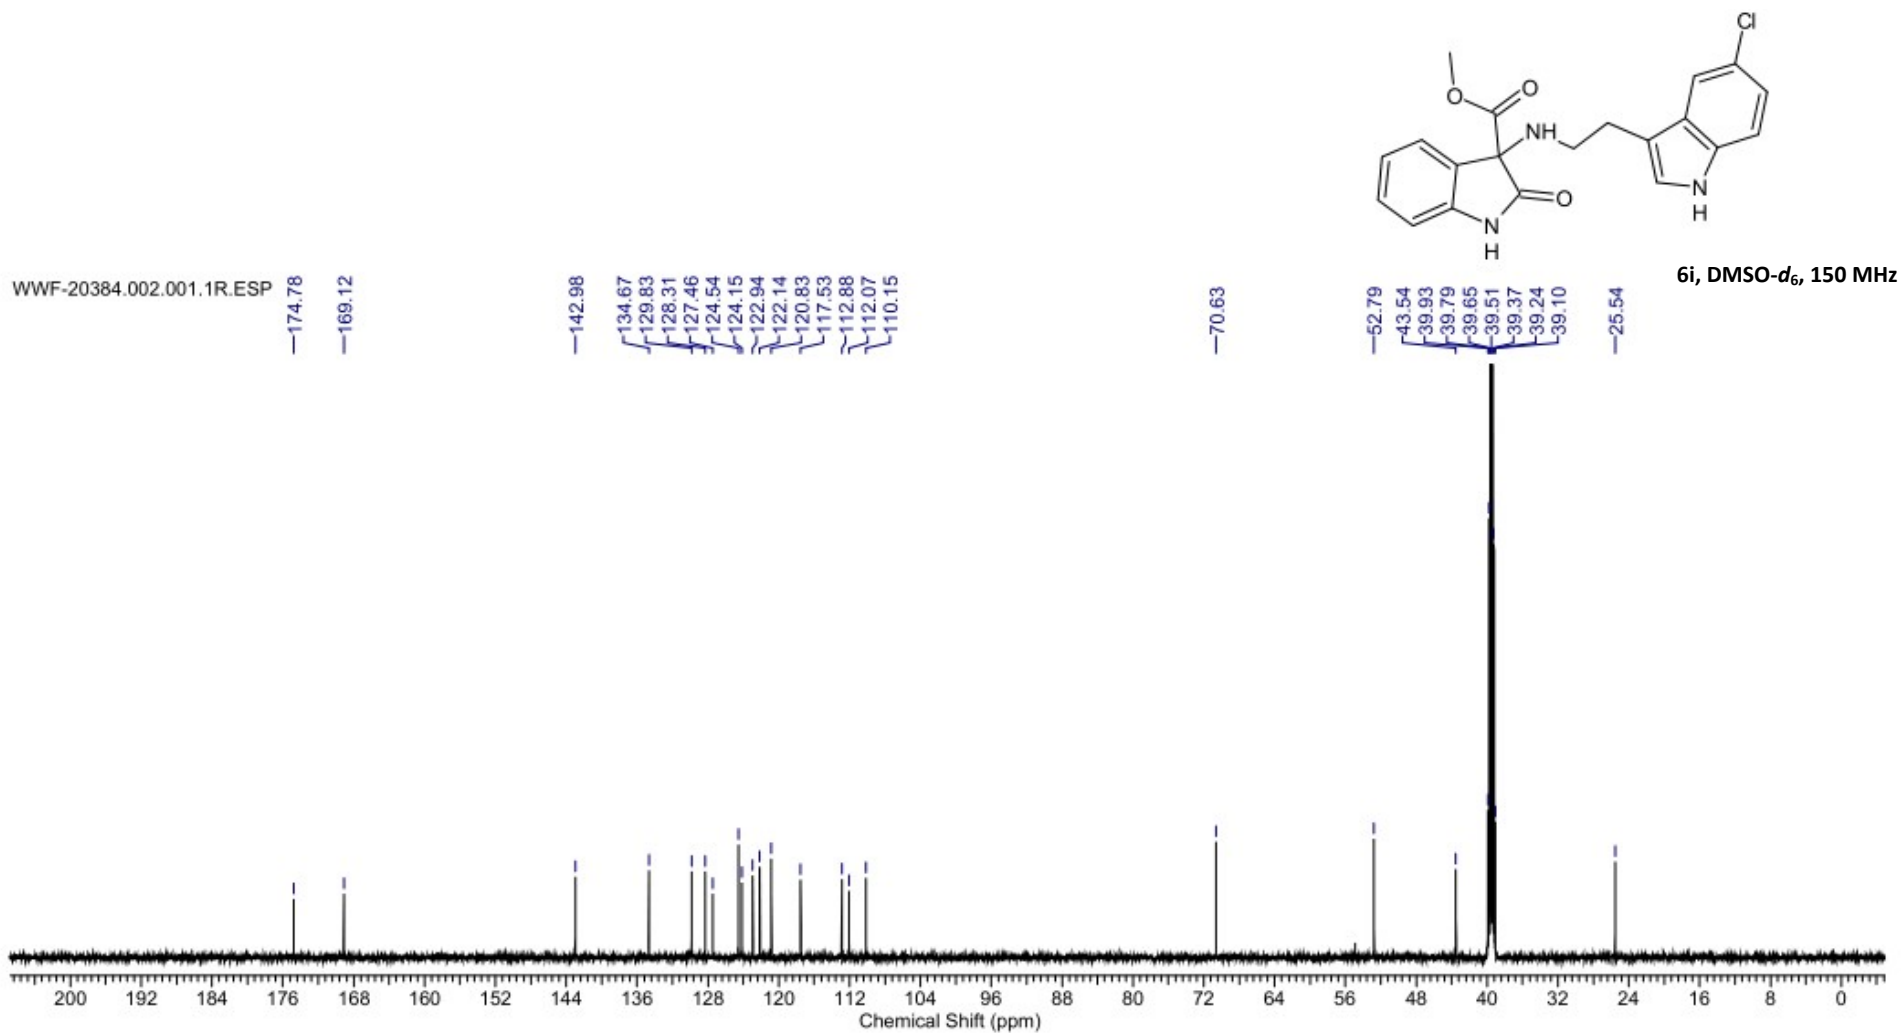

XDL-21383 #22 RT: 0.10 AV: 1 NL: 8.78E7  
T: FTMS + p ESI Full ms [100.0000-1500.0000]

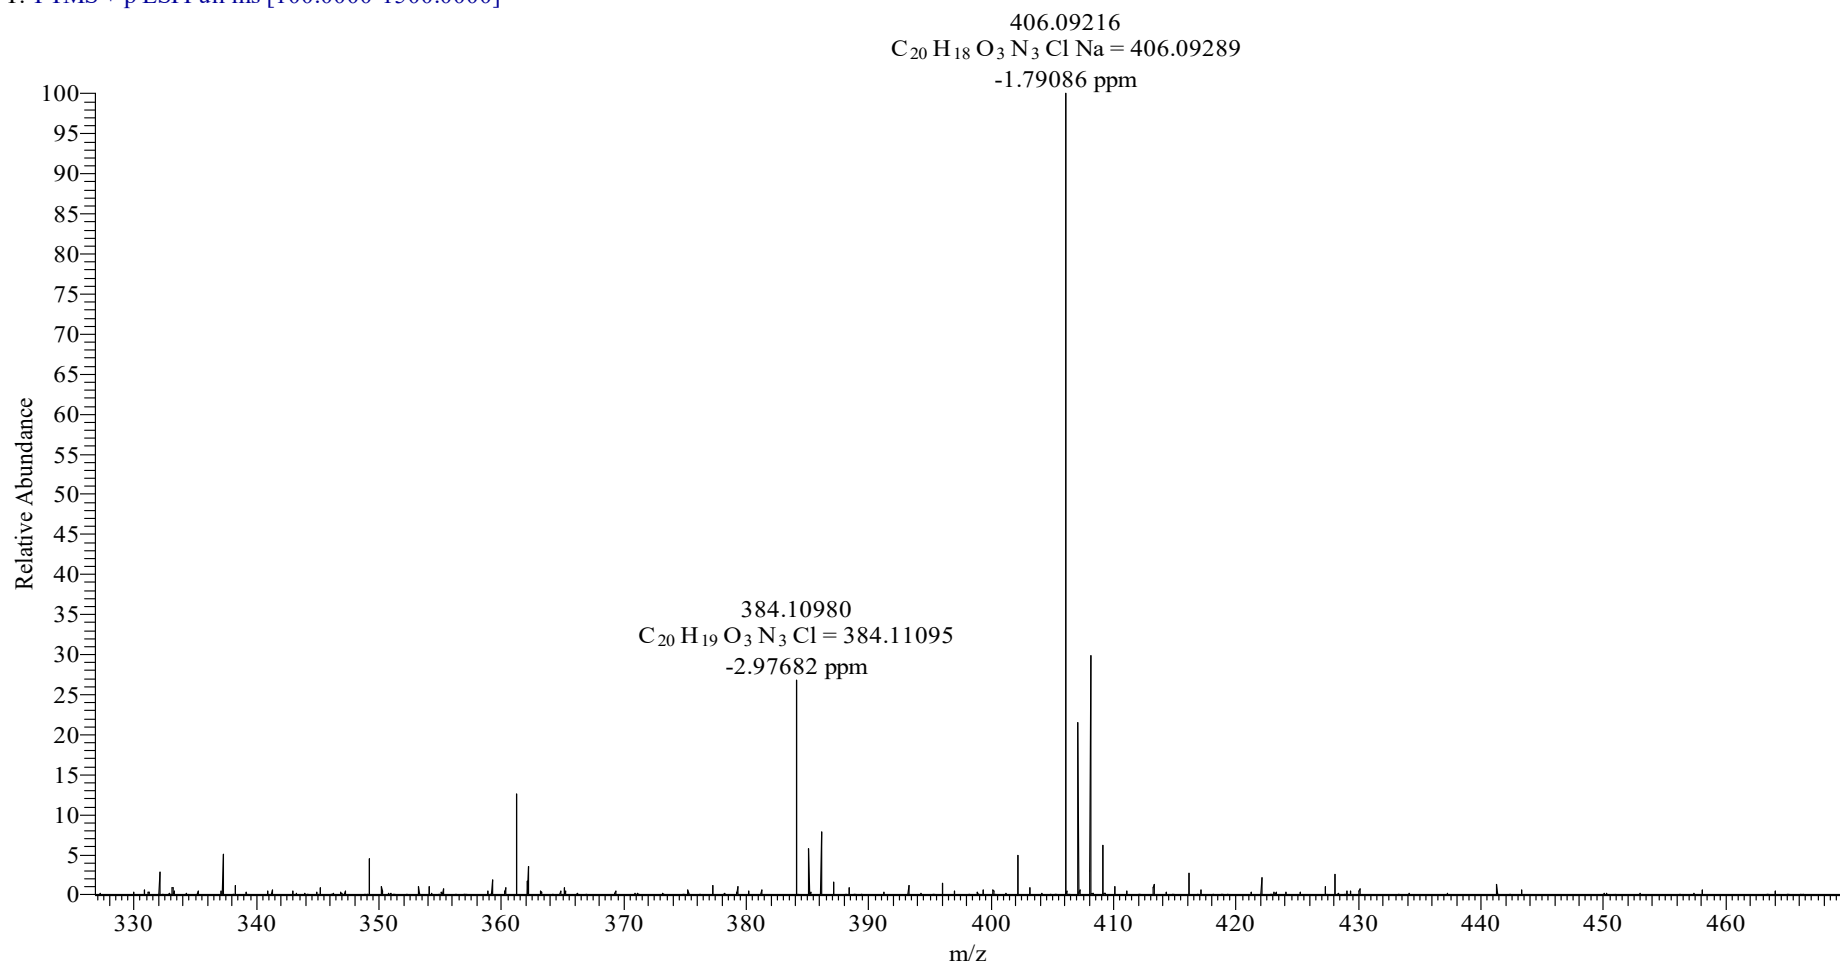

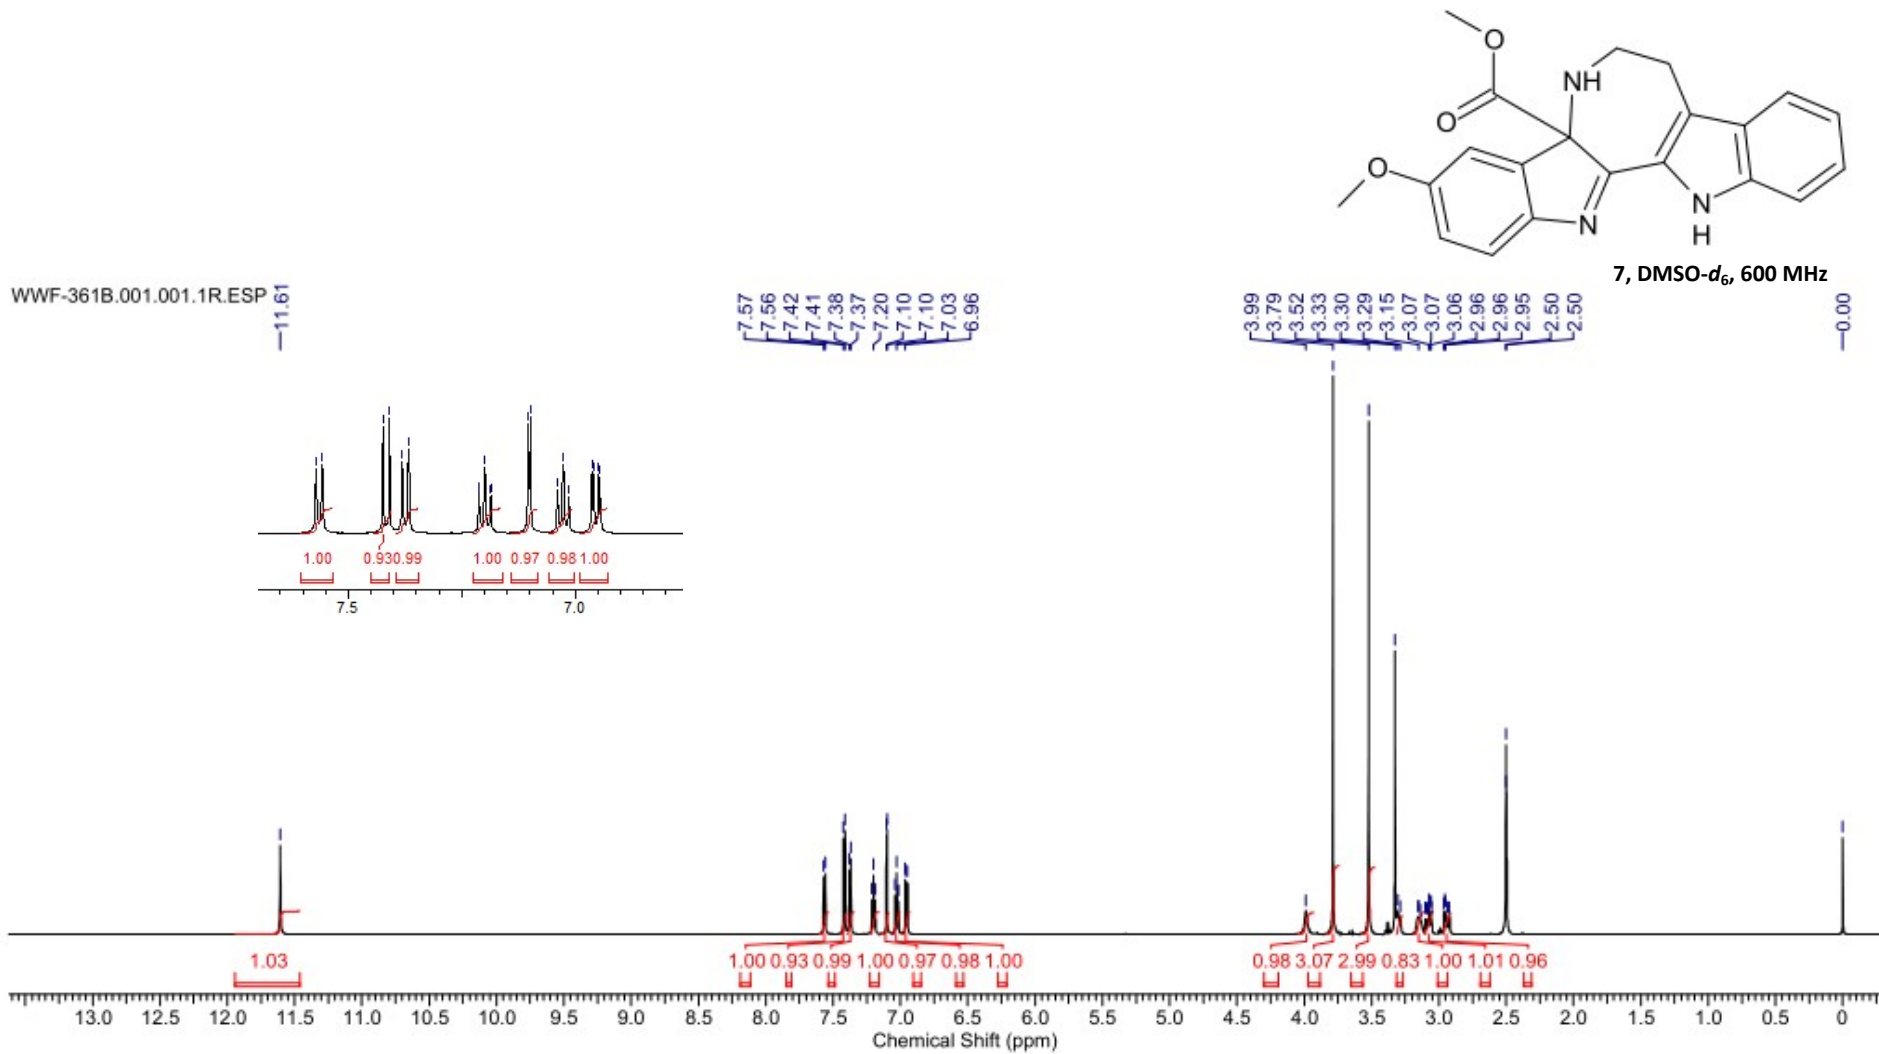

WWF-21361B-1208.002.001.1r.esp

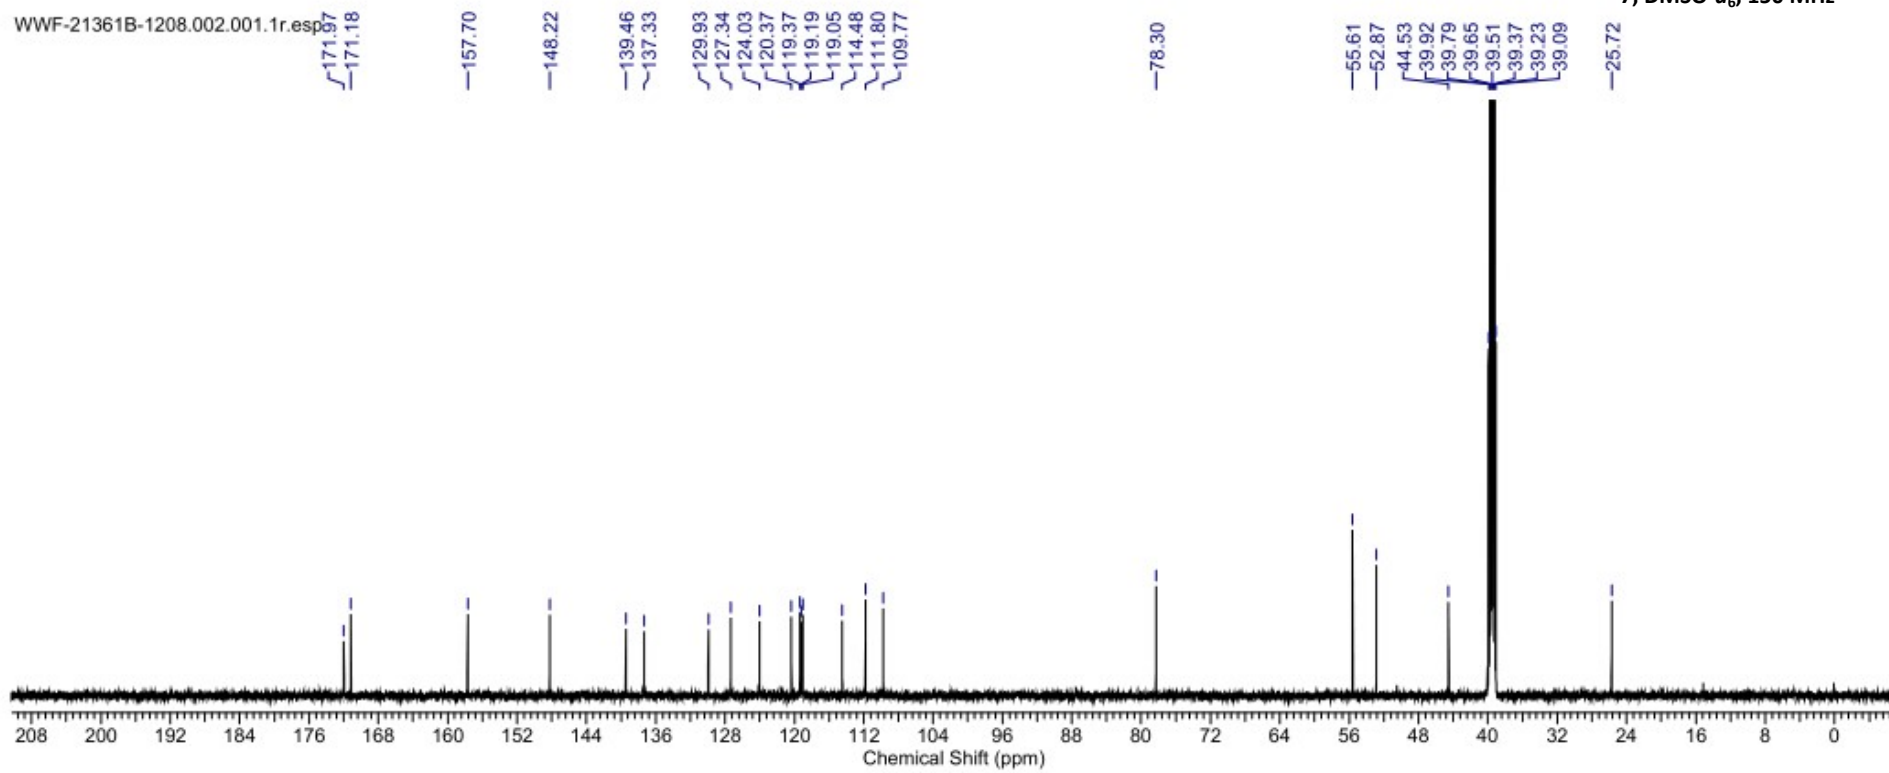

XDL-21383 #22 RT: 0.10 AV: 1 NL: 8.78E7  
T: FTMS + p ESI Full ms [100.0000-1500.0000]

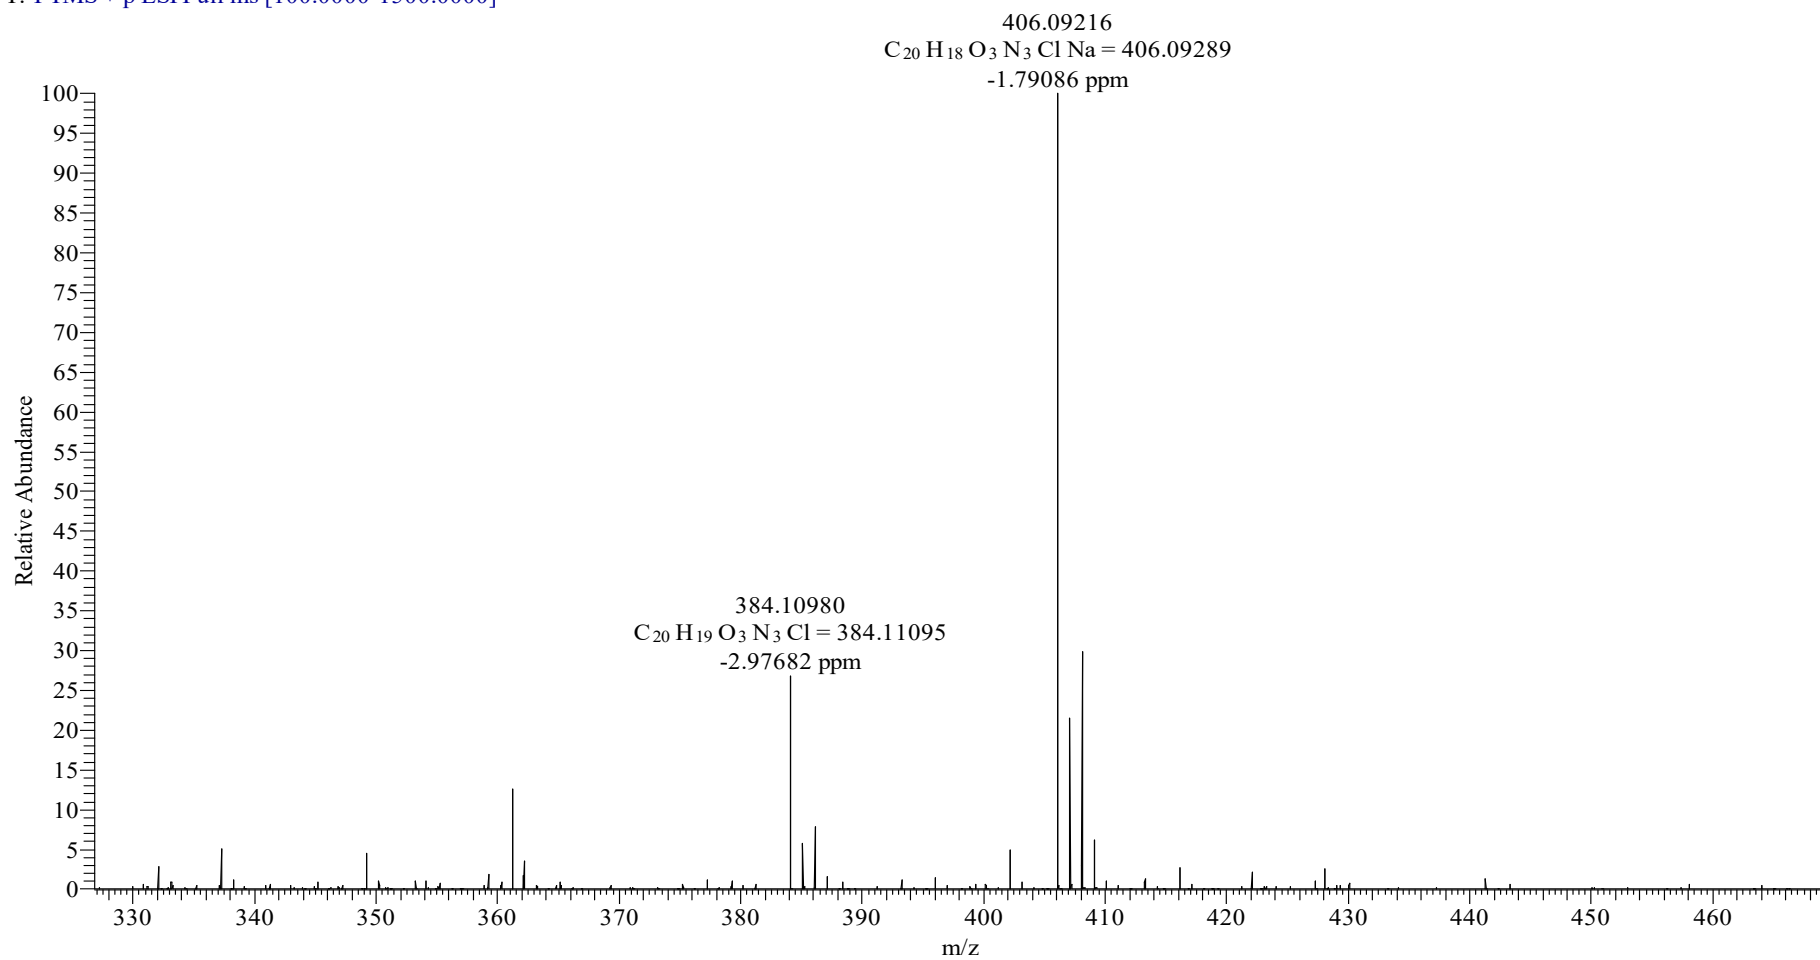

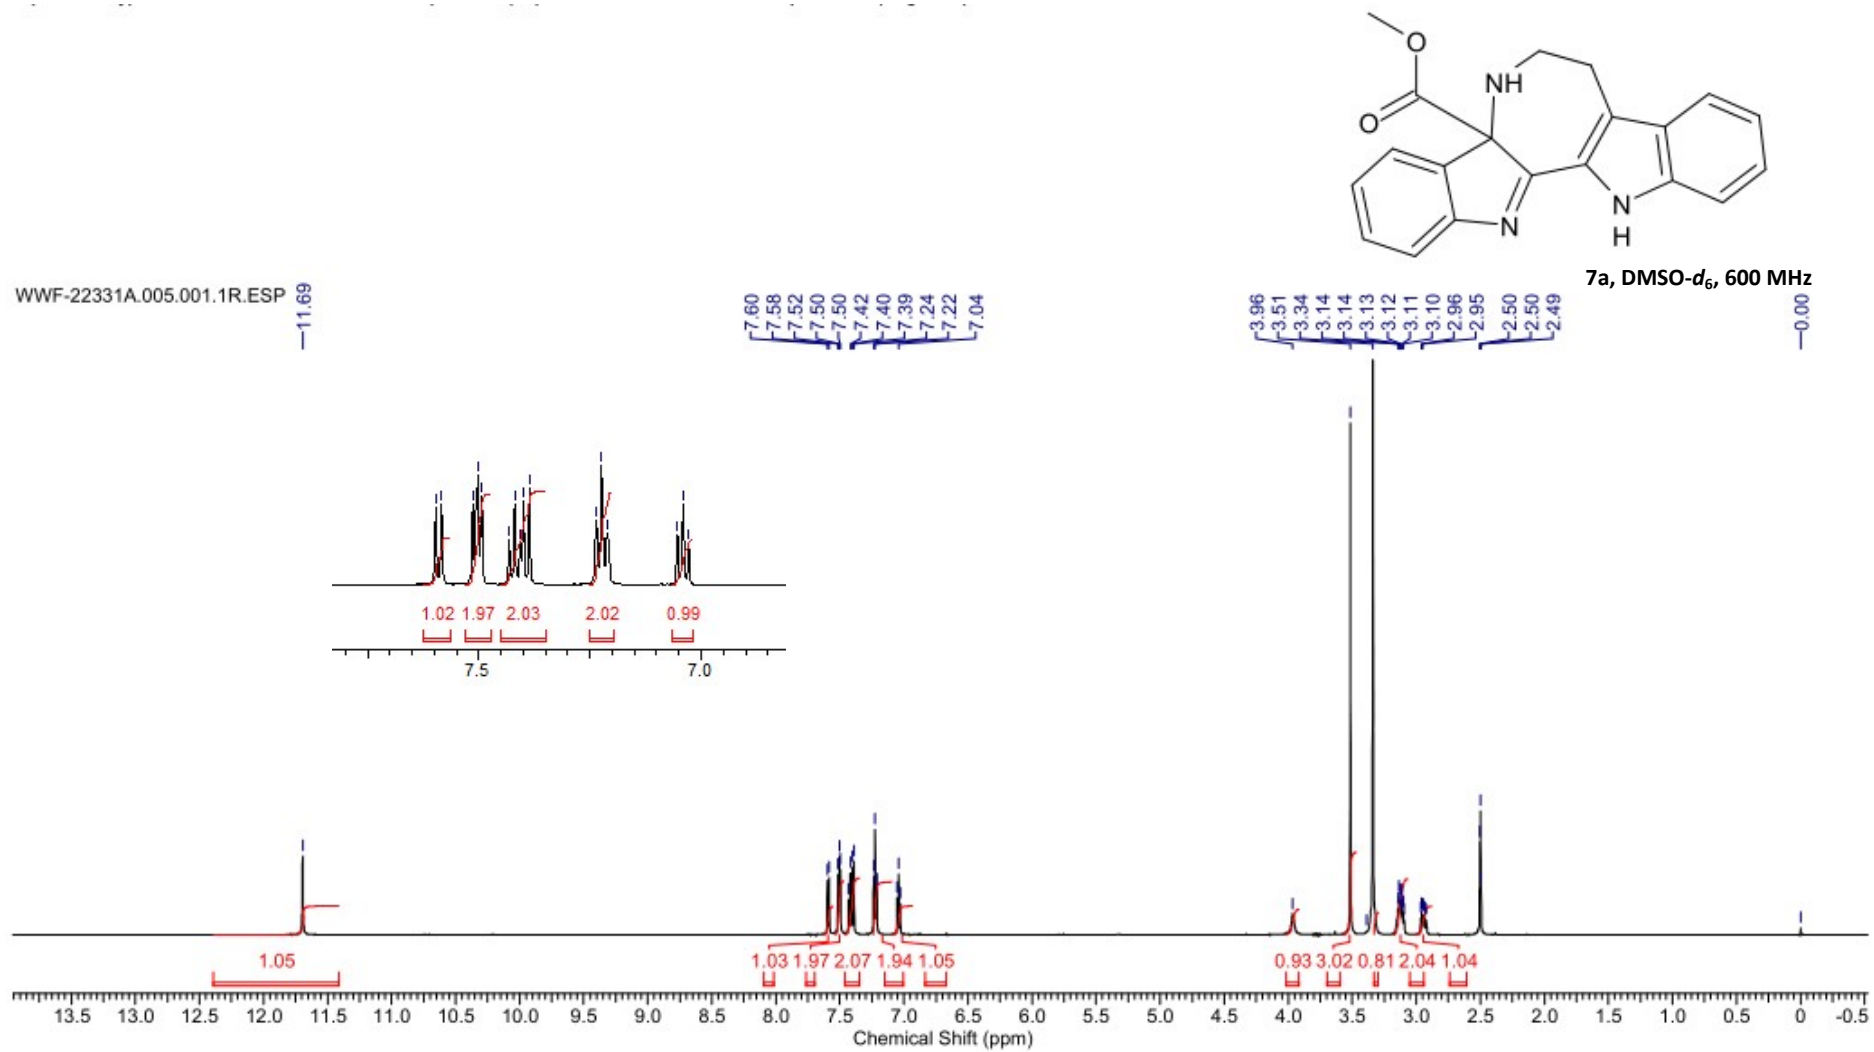

WWF-21331.003.001.1R.ESP

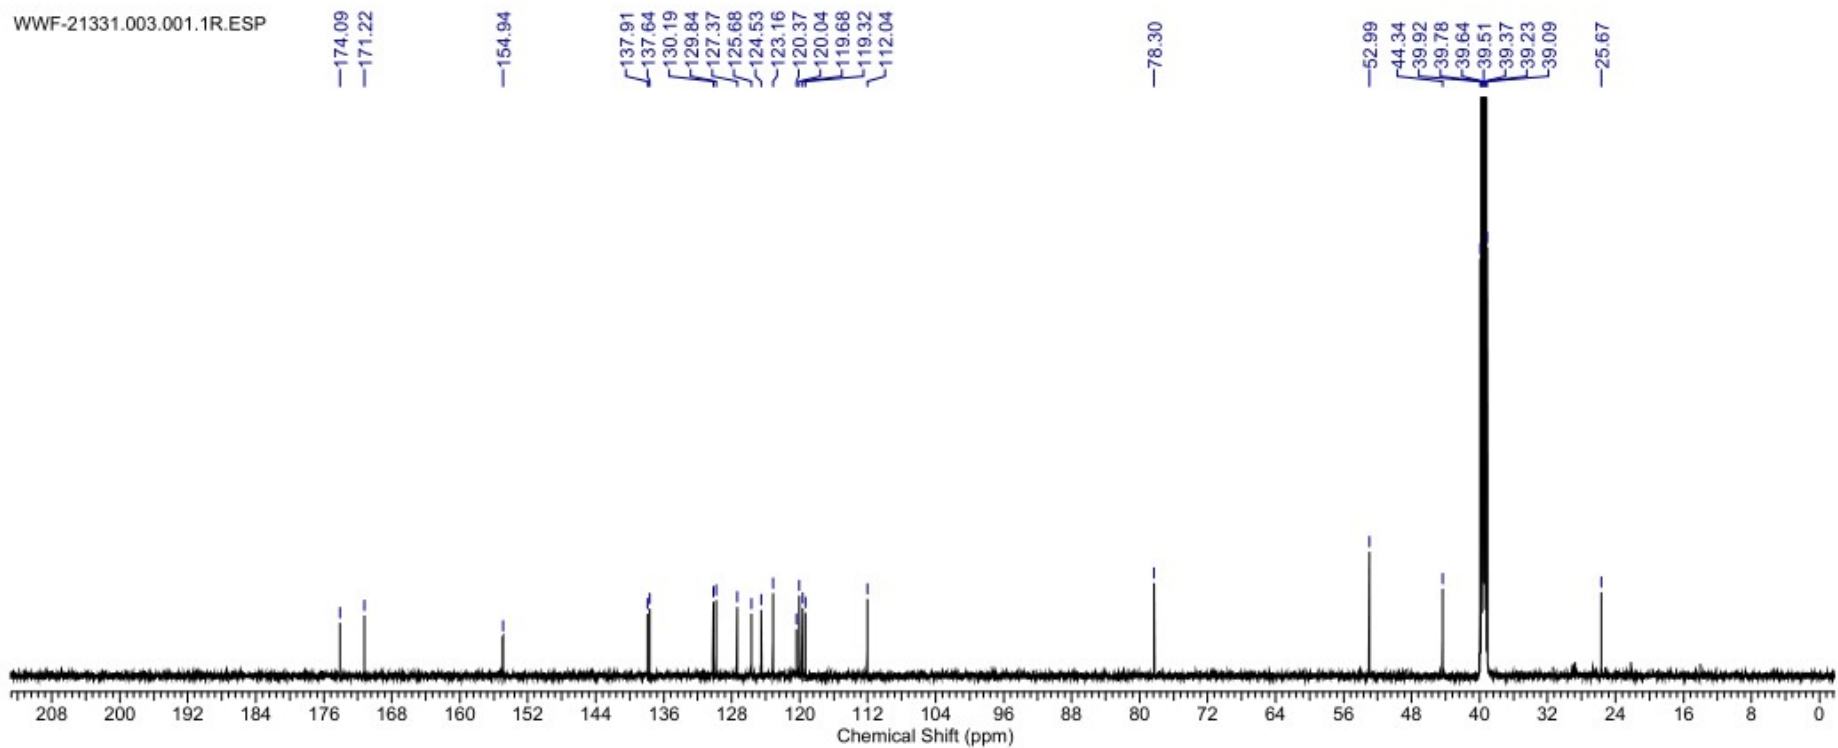

WWF-22331 #21 RT: 0.09 AV: 1 NL: 2.12E9  
T: FTMS + p ESI Full ms [100.0000-1500.0000]

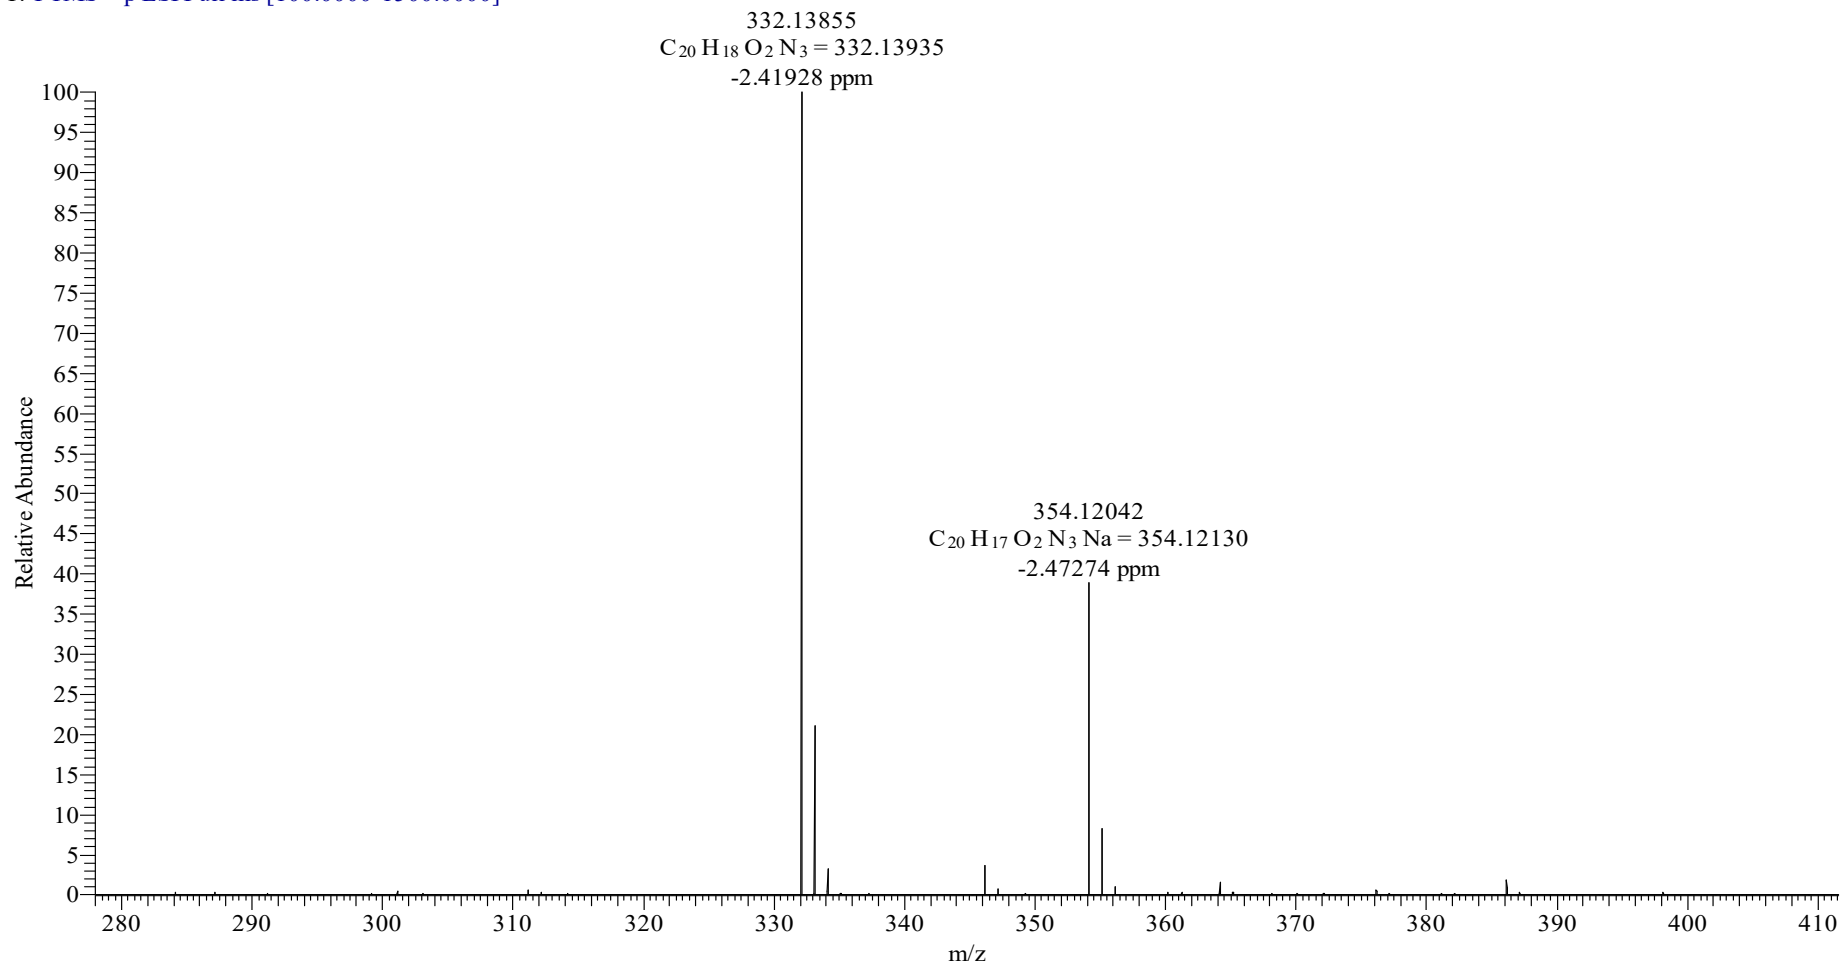



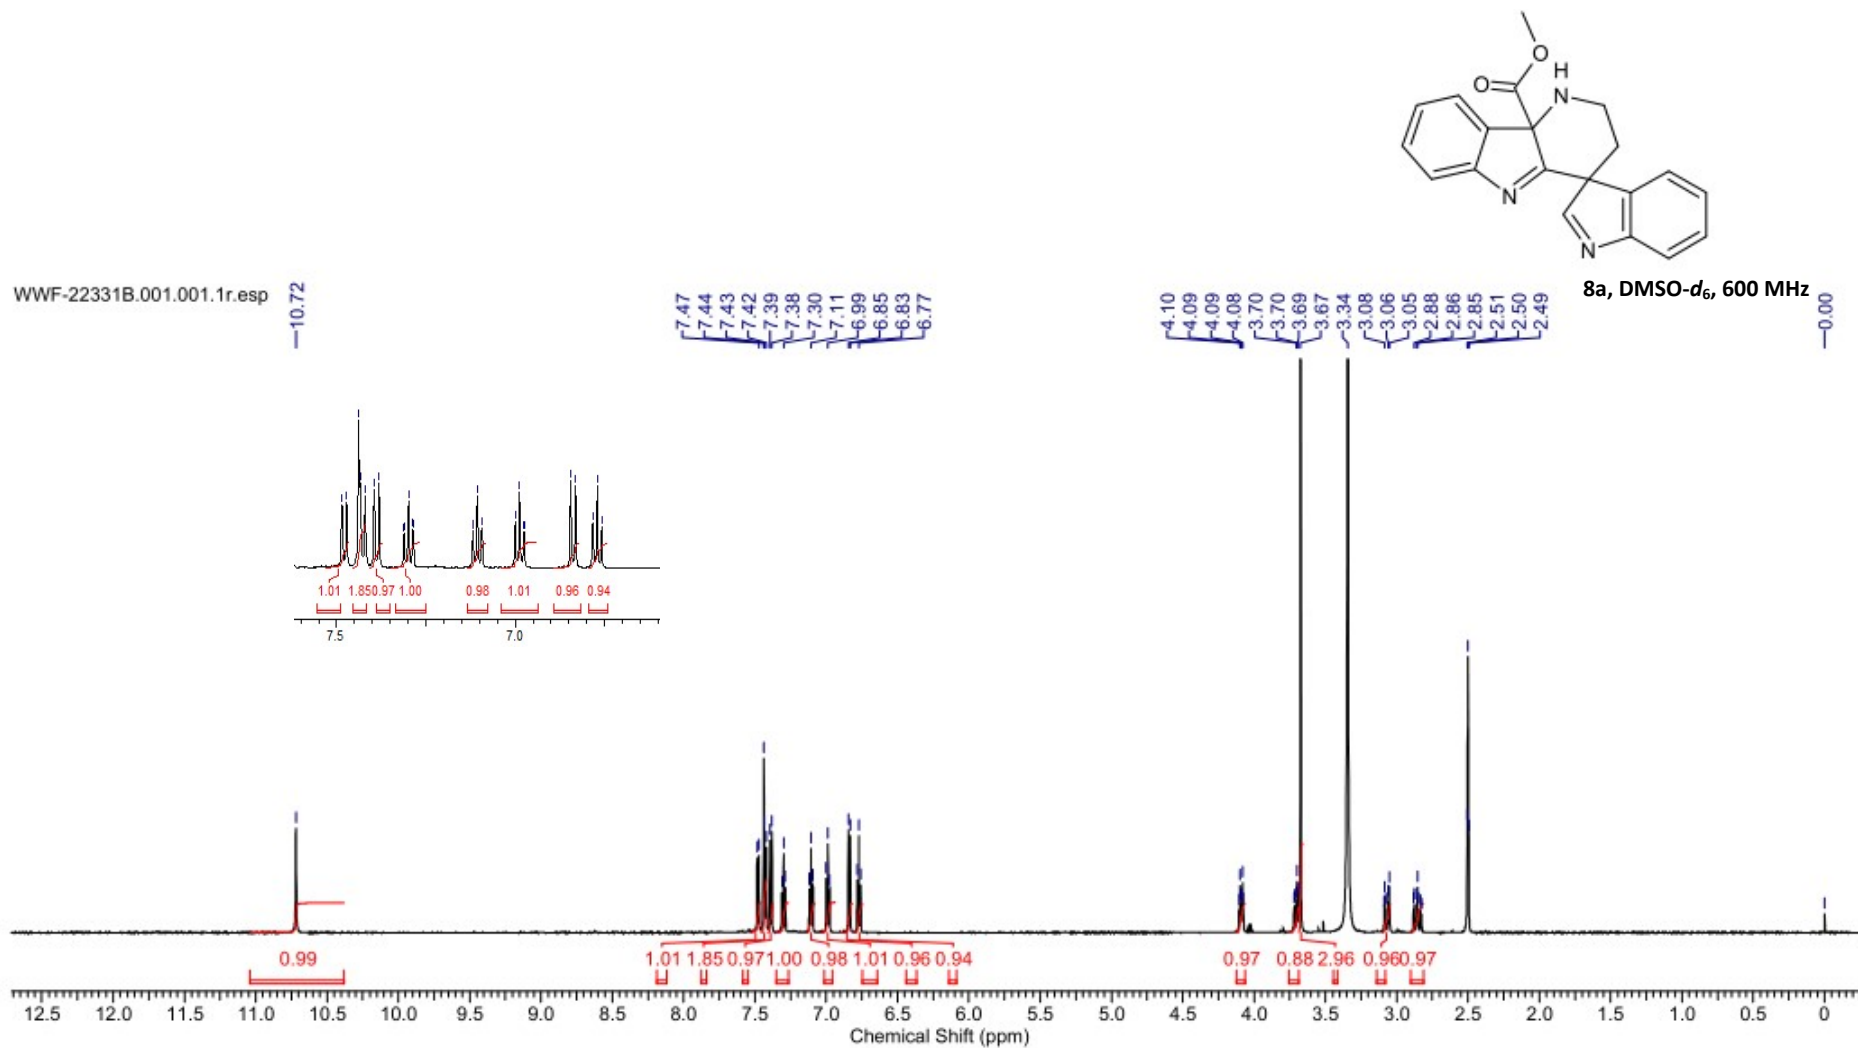

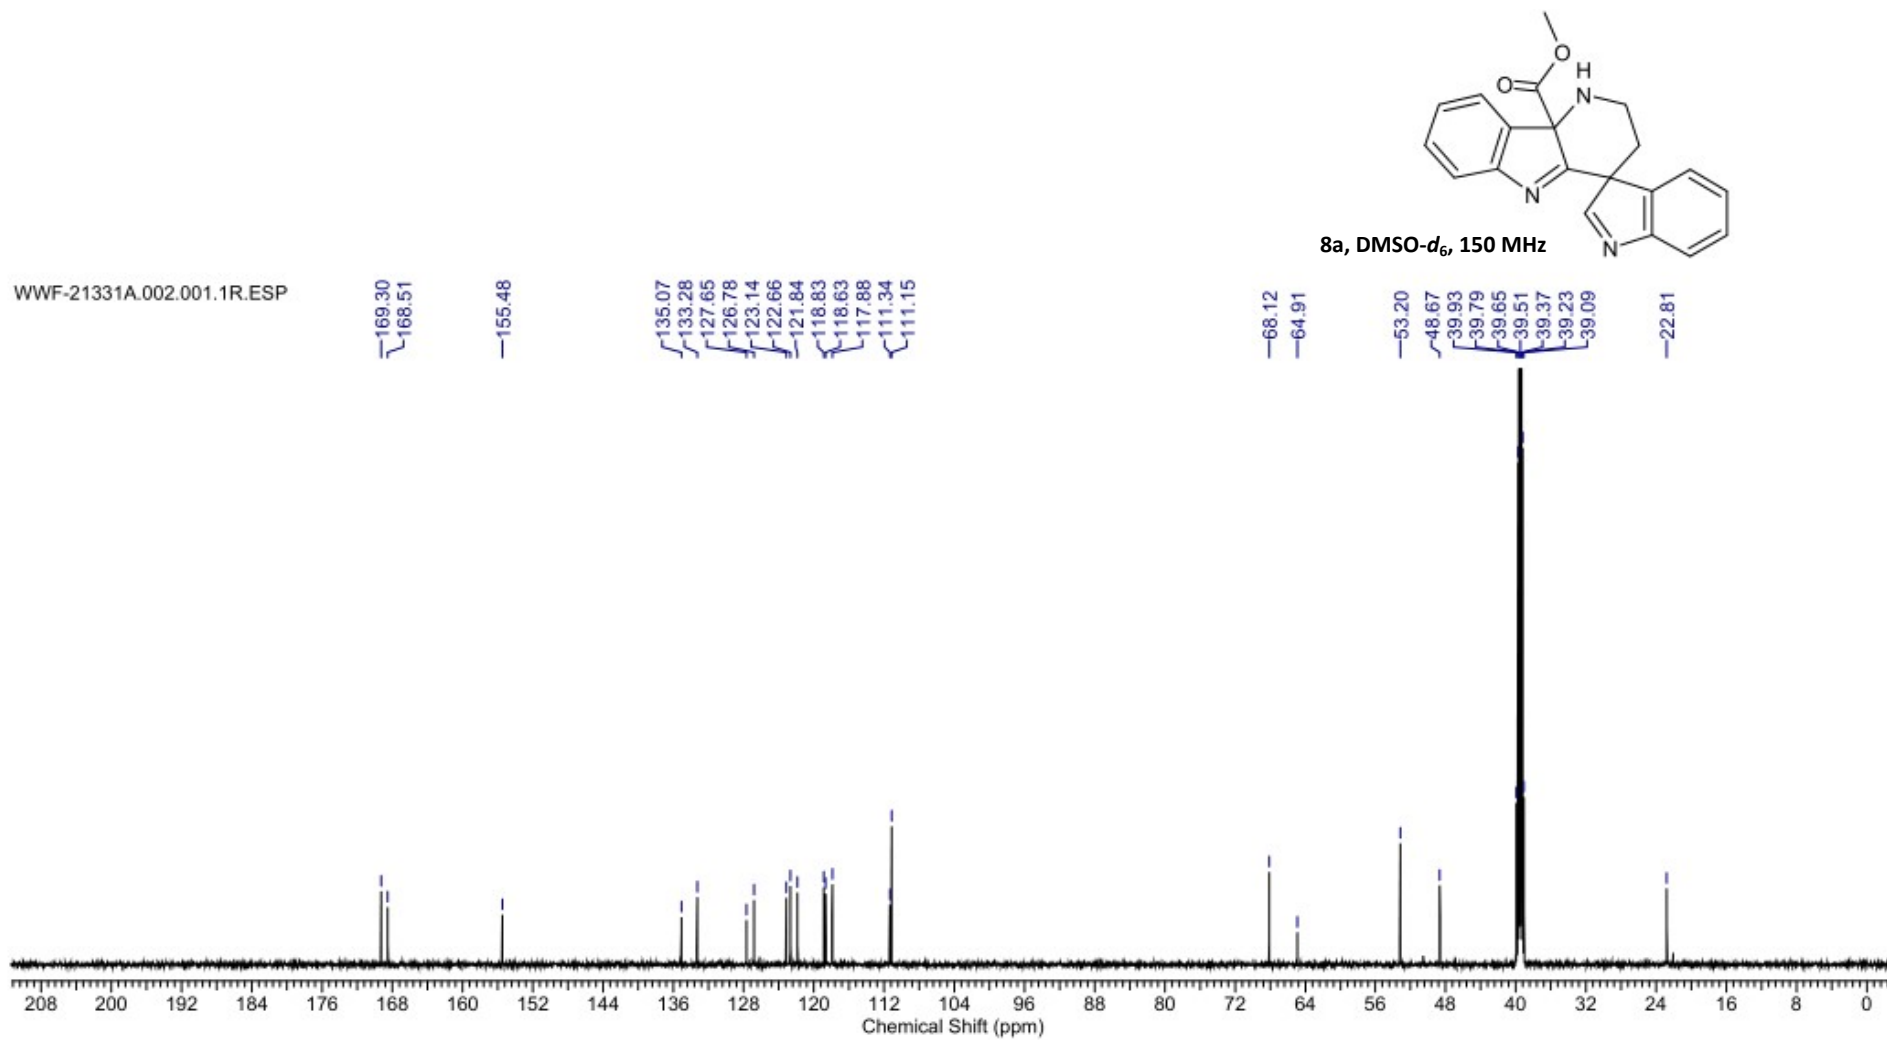

WWF-22331B #22 RT: 0.10 AV: 1 NL: 3.24E9  
T: FTMS + p ESI Full ms [100.0000-1500.0000]

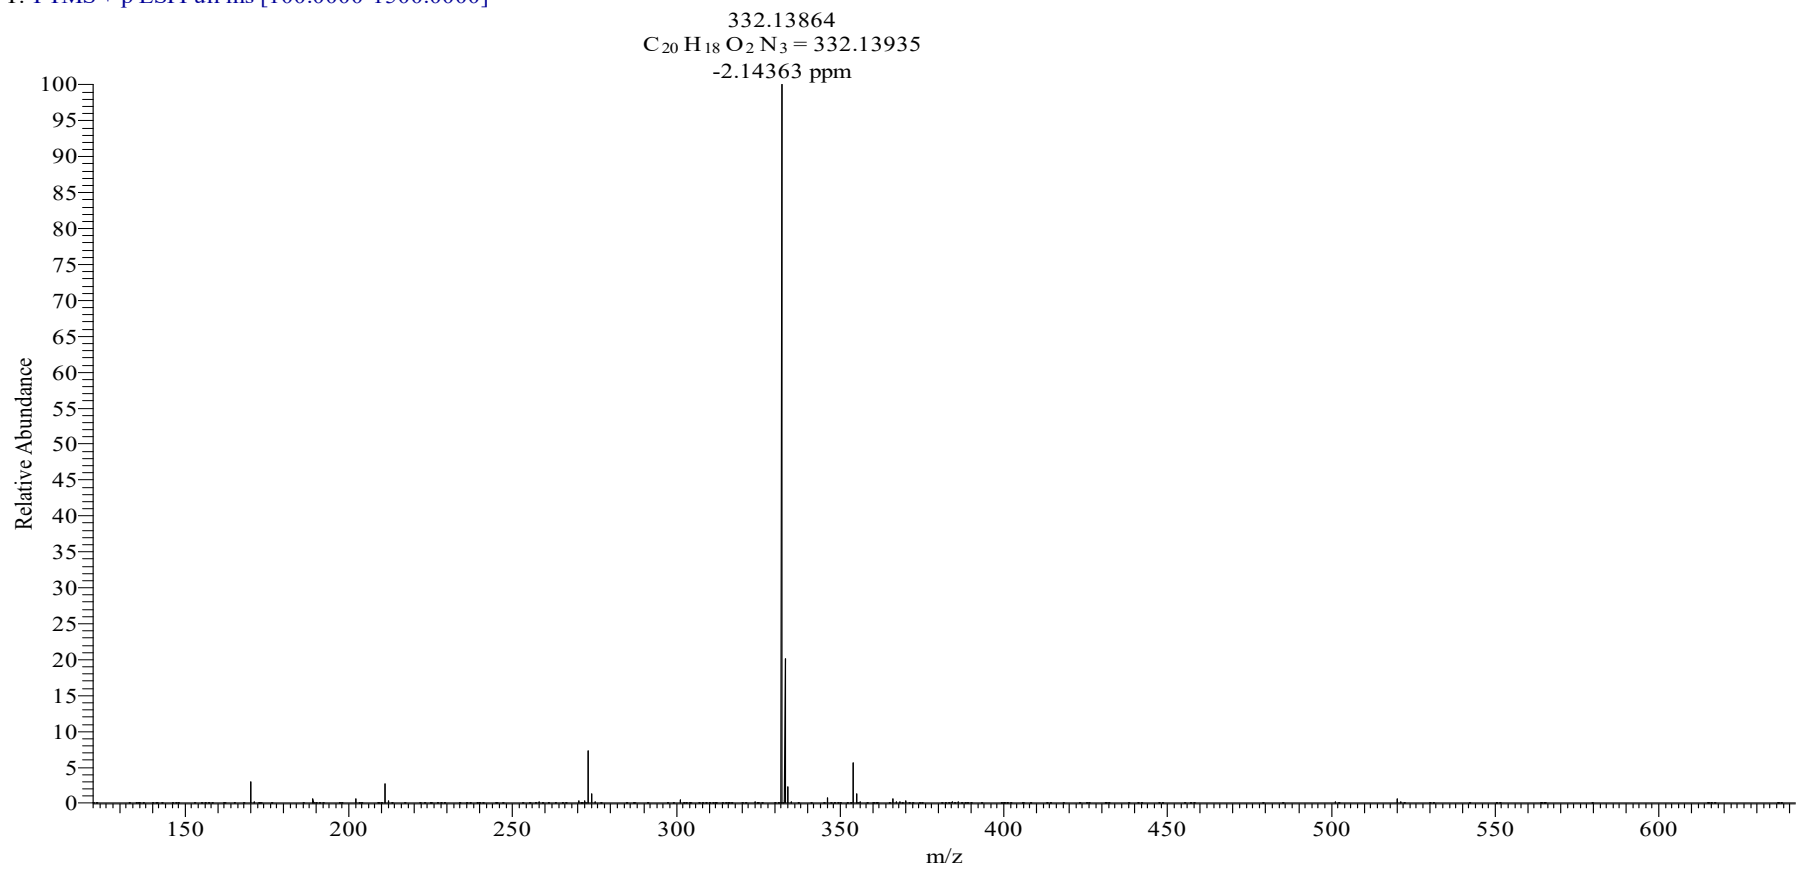

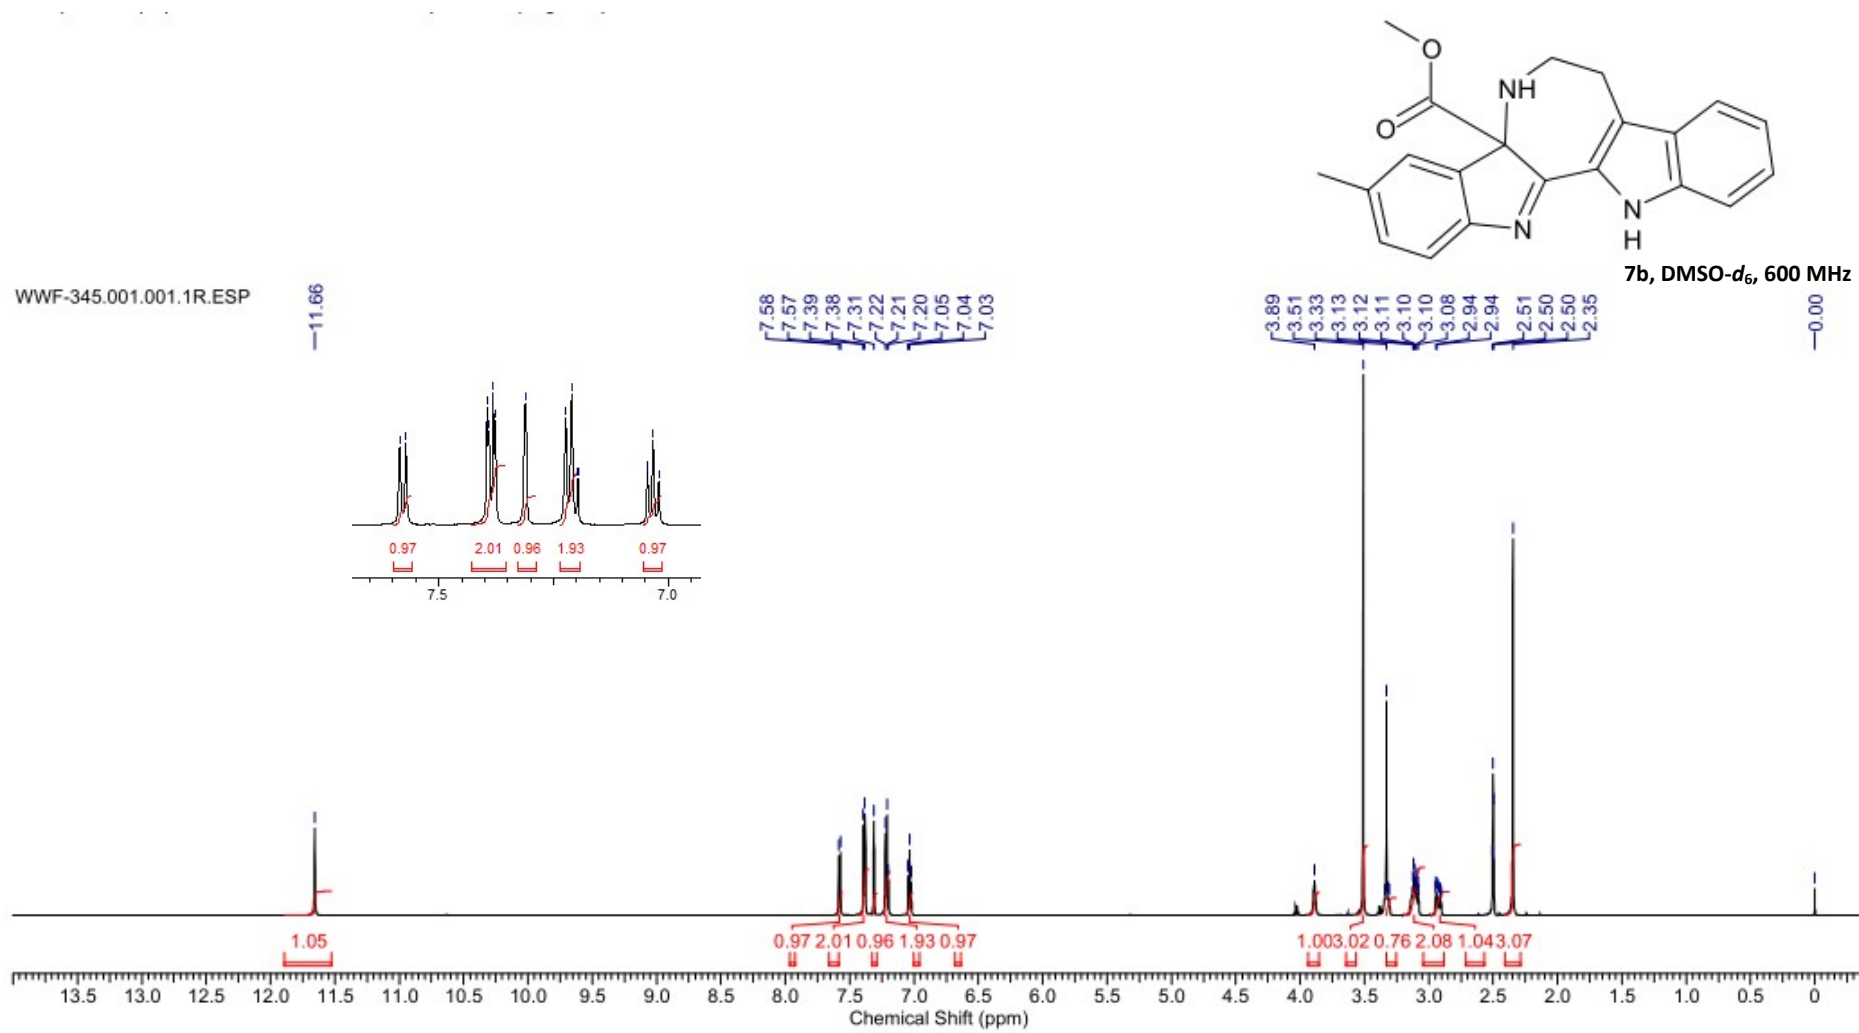

WWF-345.003.001.1R.ESP

173.14  
171.18

152.69

138.05  
137.47  
135.01  
130.37  
129.90  
127.30  
124.21  
123.69  
119.77  
119.56  
119.48  
119.11  
111.88

78.06

52.84  
44.30  
39.93  
39.79  
39.65  
39.51  
39.37  
39.24  
39.10

7b, DMSO-*d*<sub>6</sub>, 150 MHz

25.60  
21.01

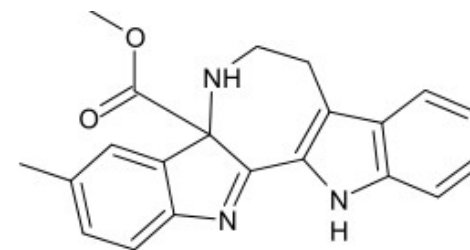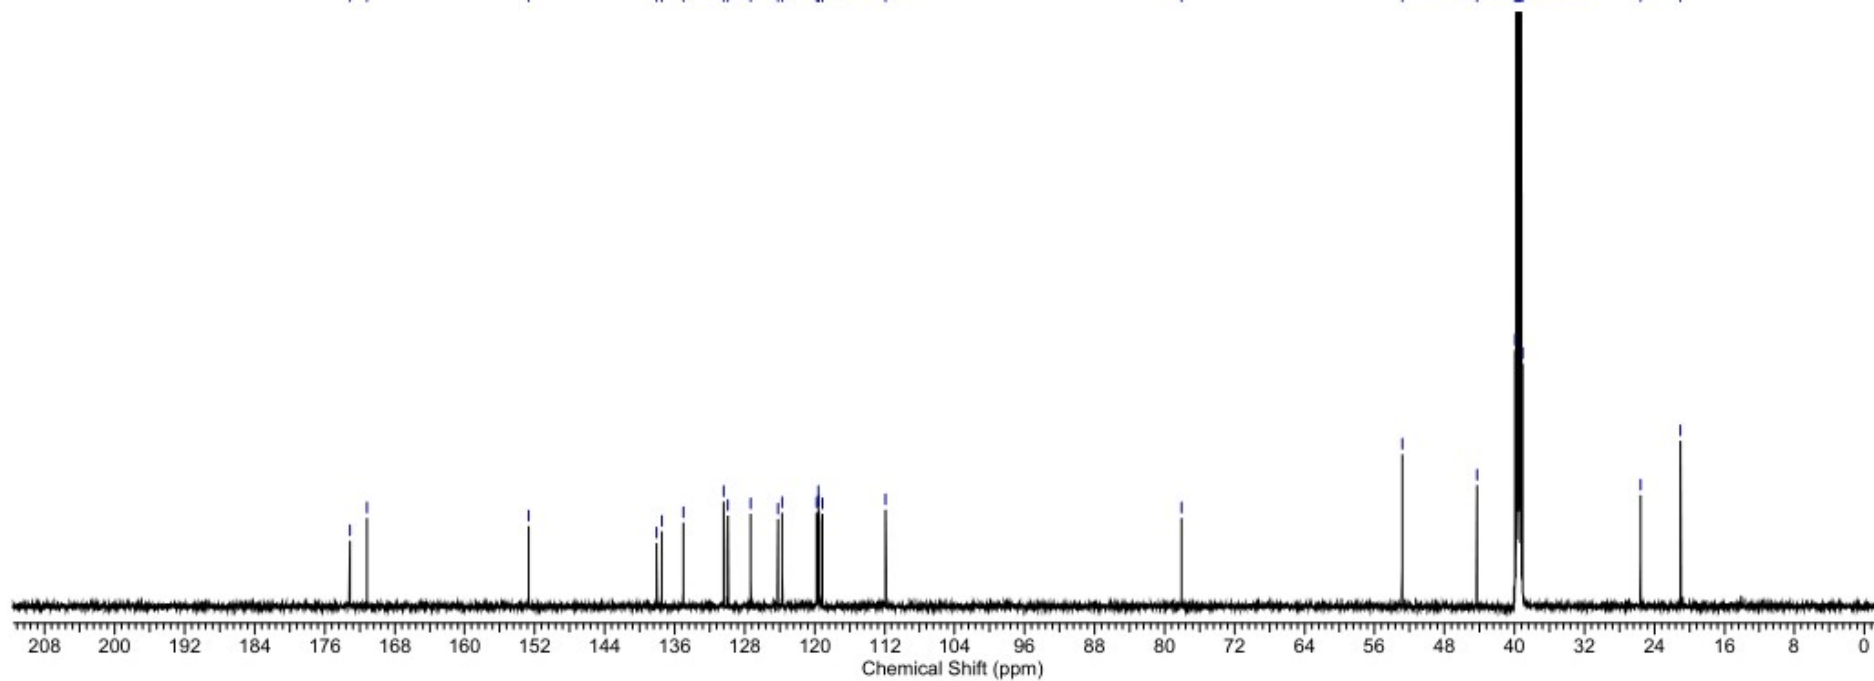

WWF-22345 #22 RT: 0.10 AV: 1 NL: 2.12E9  
T: FTMS + p ESI Full ms [100.0000-1500.0000]

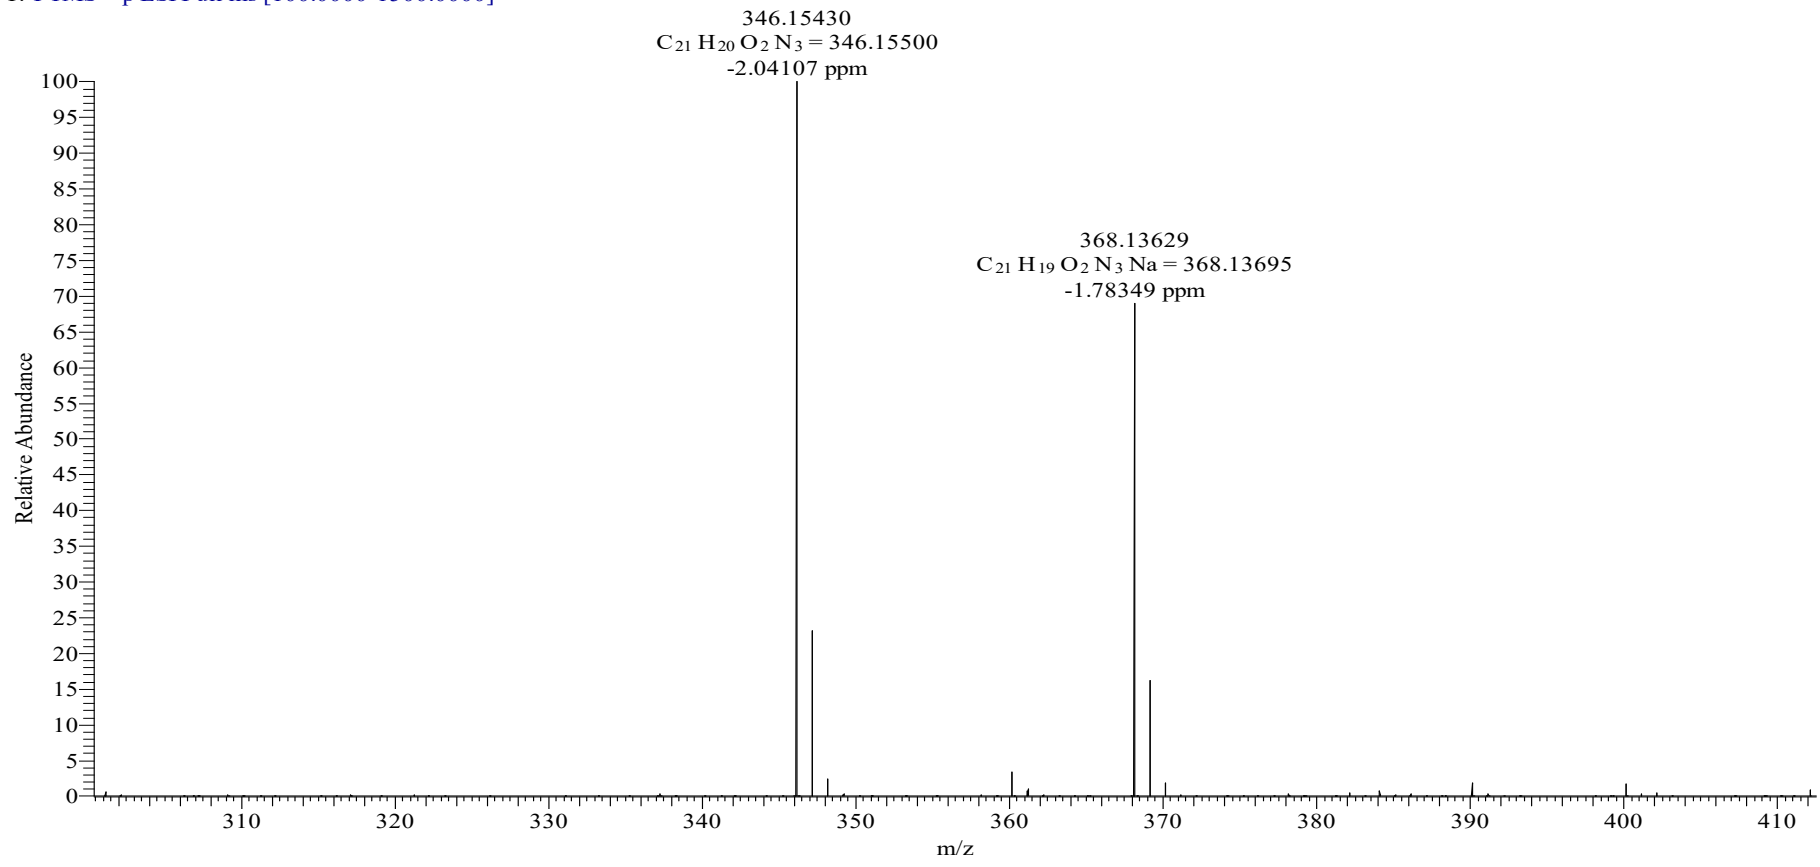

WWF-359.001.001.1R.ESP

—11.48

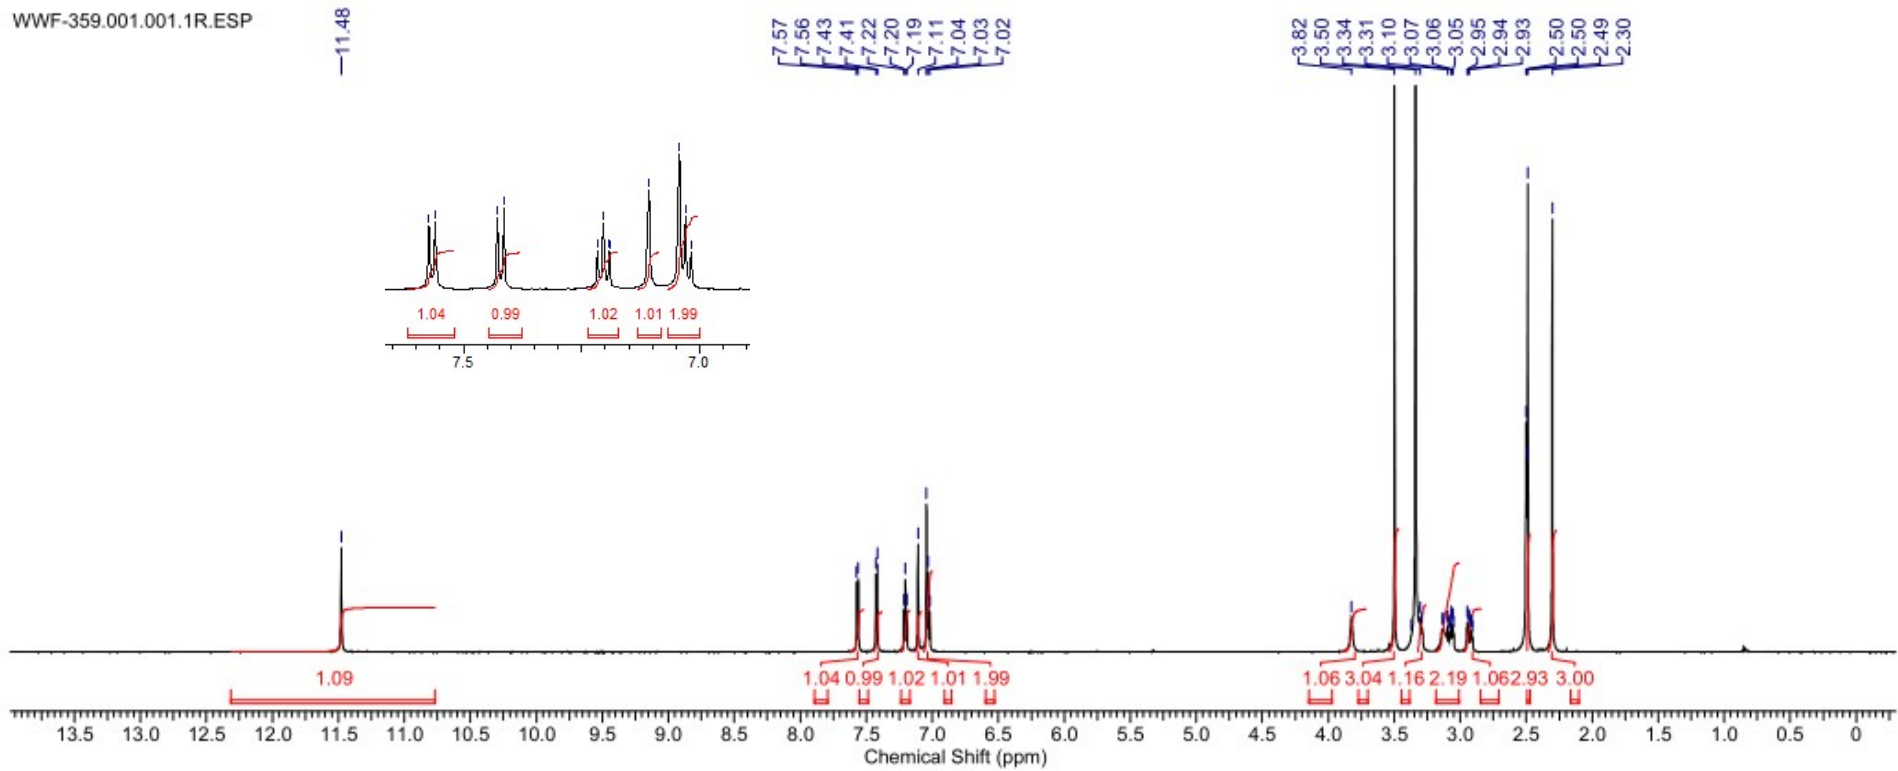

WWF-359.002.001.1R.ESP

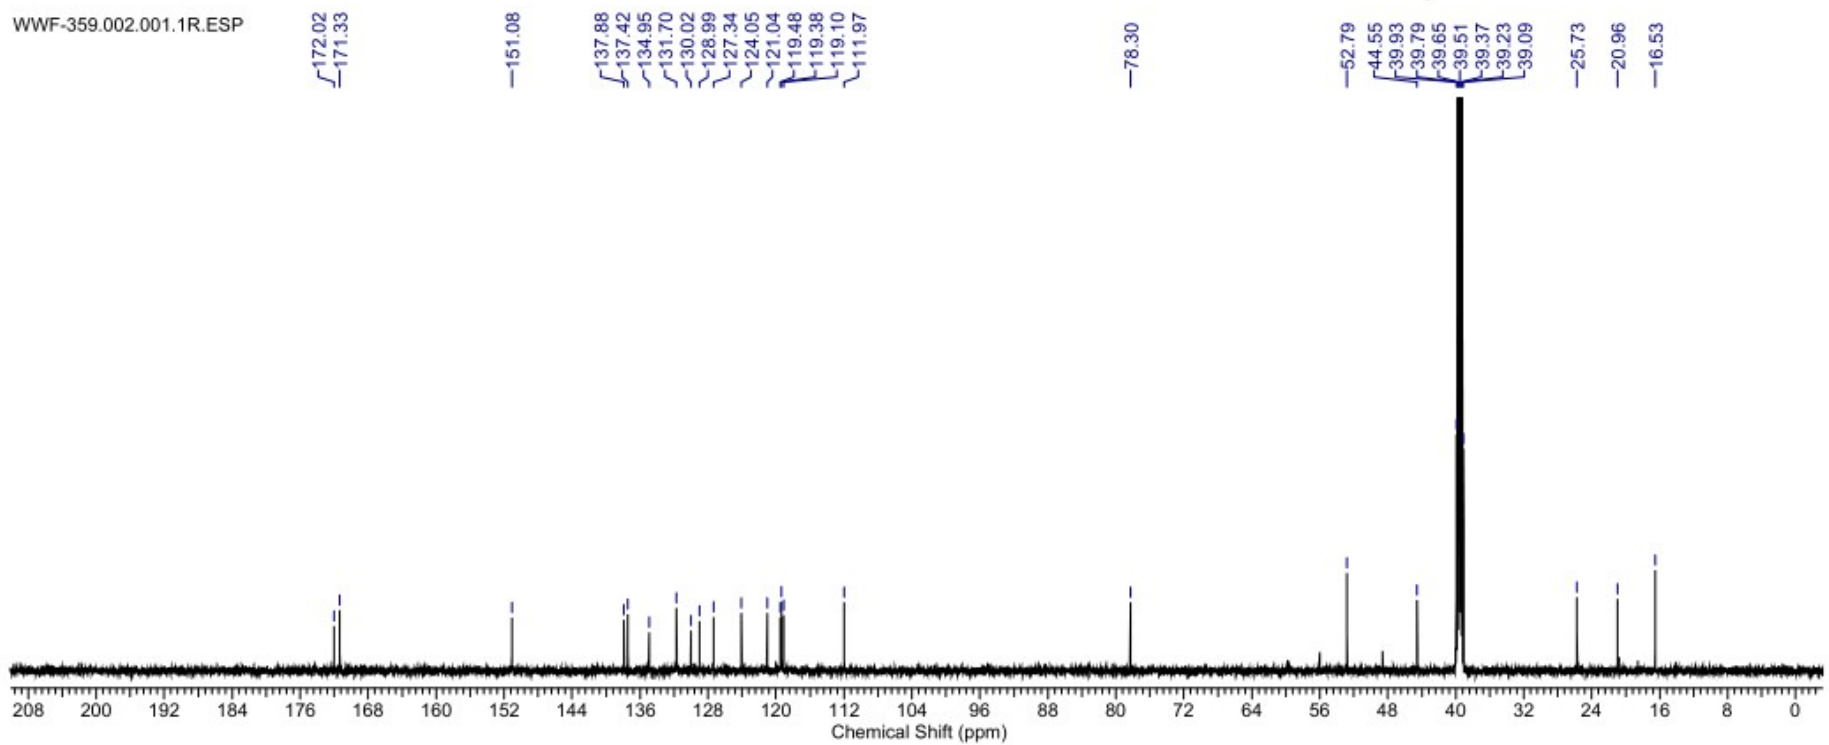



WWF-22359 #22 RT: 0.10 AV: 1 NL: 1.33E9  
T: FTMS + p ESI Full ms [100.0000-1500.0000]

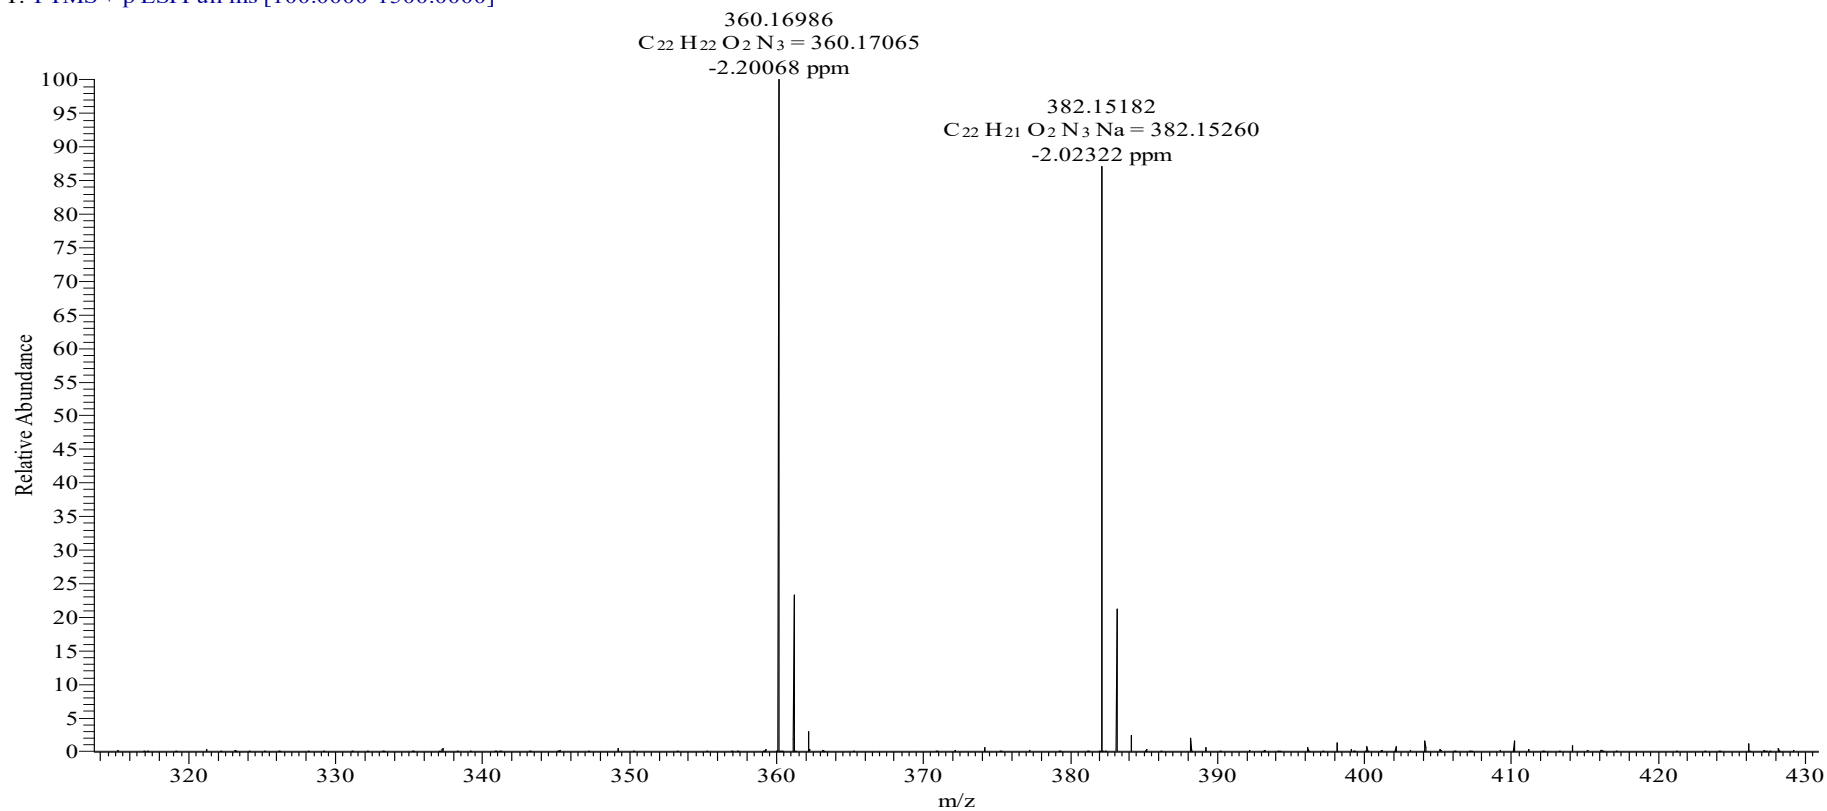

WWF365.001.001.1R.ESP

—11.72

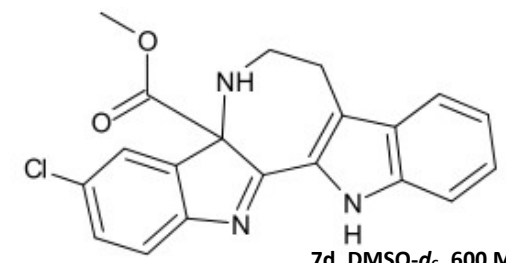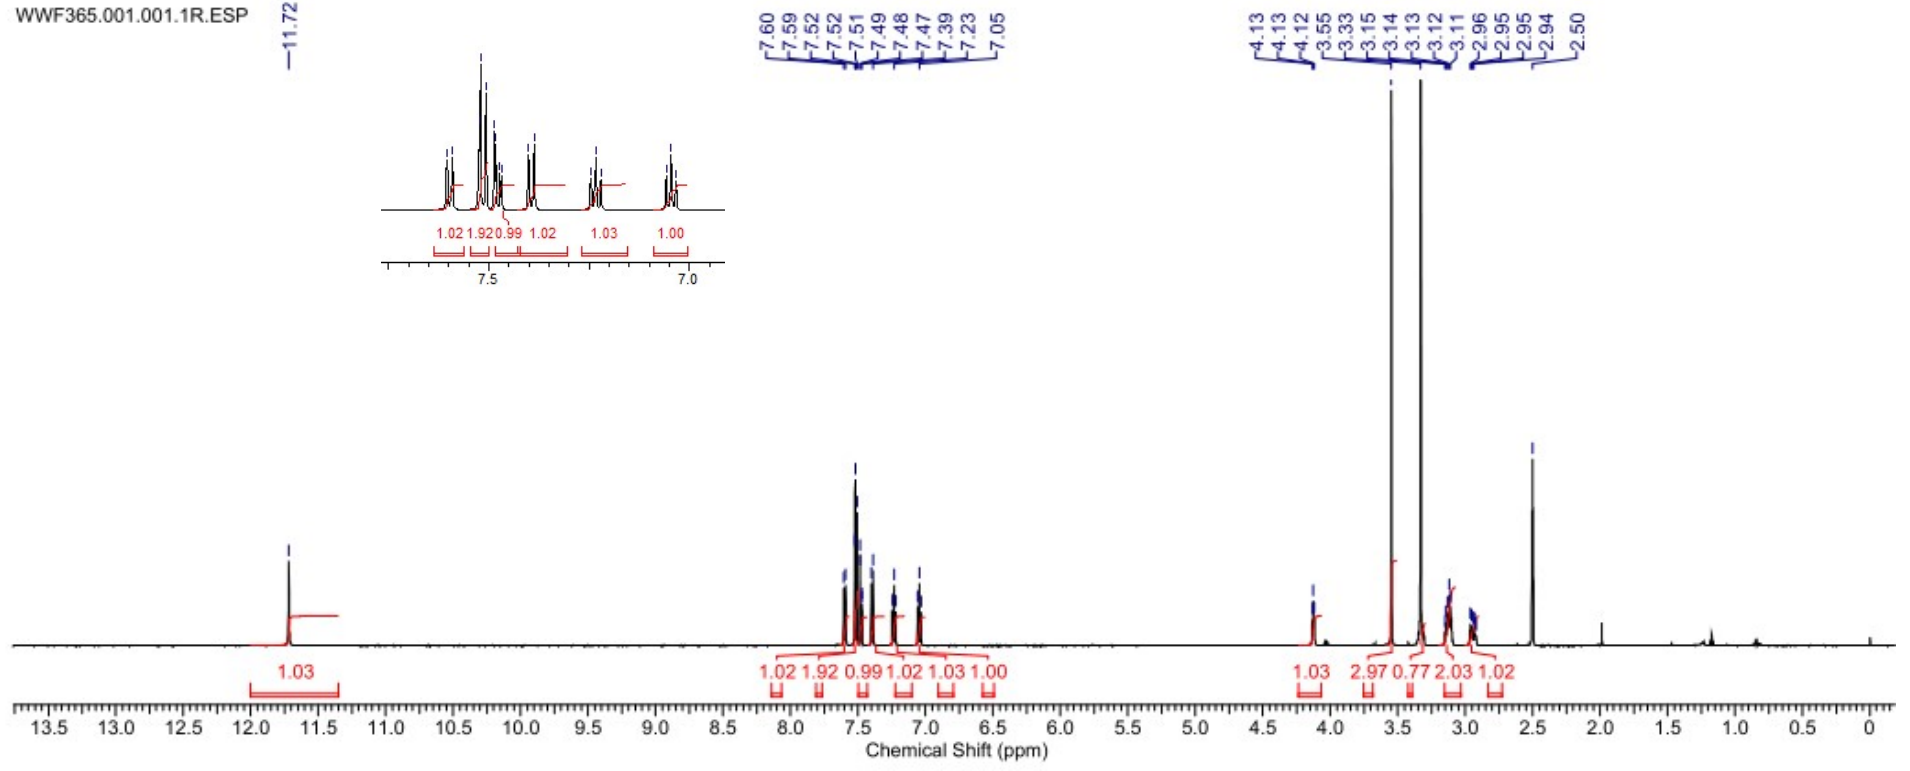

DESKTOP.001.001.1R.ESP

—174.57  
—170.62

—153.71

—139.80  
—137.70  
—130.01  
—129.68  
—129.44  
—127.24  
—124.66  
—123.36  
—121.16  
—120.86  
—119.68  
—119.28  
—111.99

—78.45

—53.16  
—44.12  
—39.93  
—39.79  
—39.65  
—39.51  
—39.37  
—39.24  
—39.10

—25.61

7d, DMSO-*d*<sub>6</sub>, 150 MHz

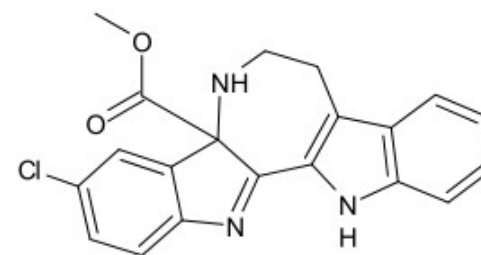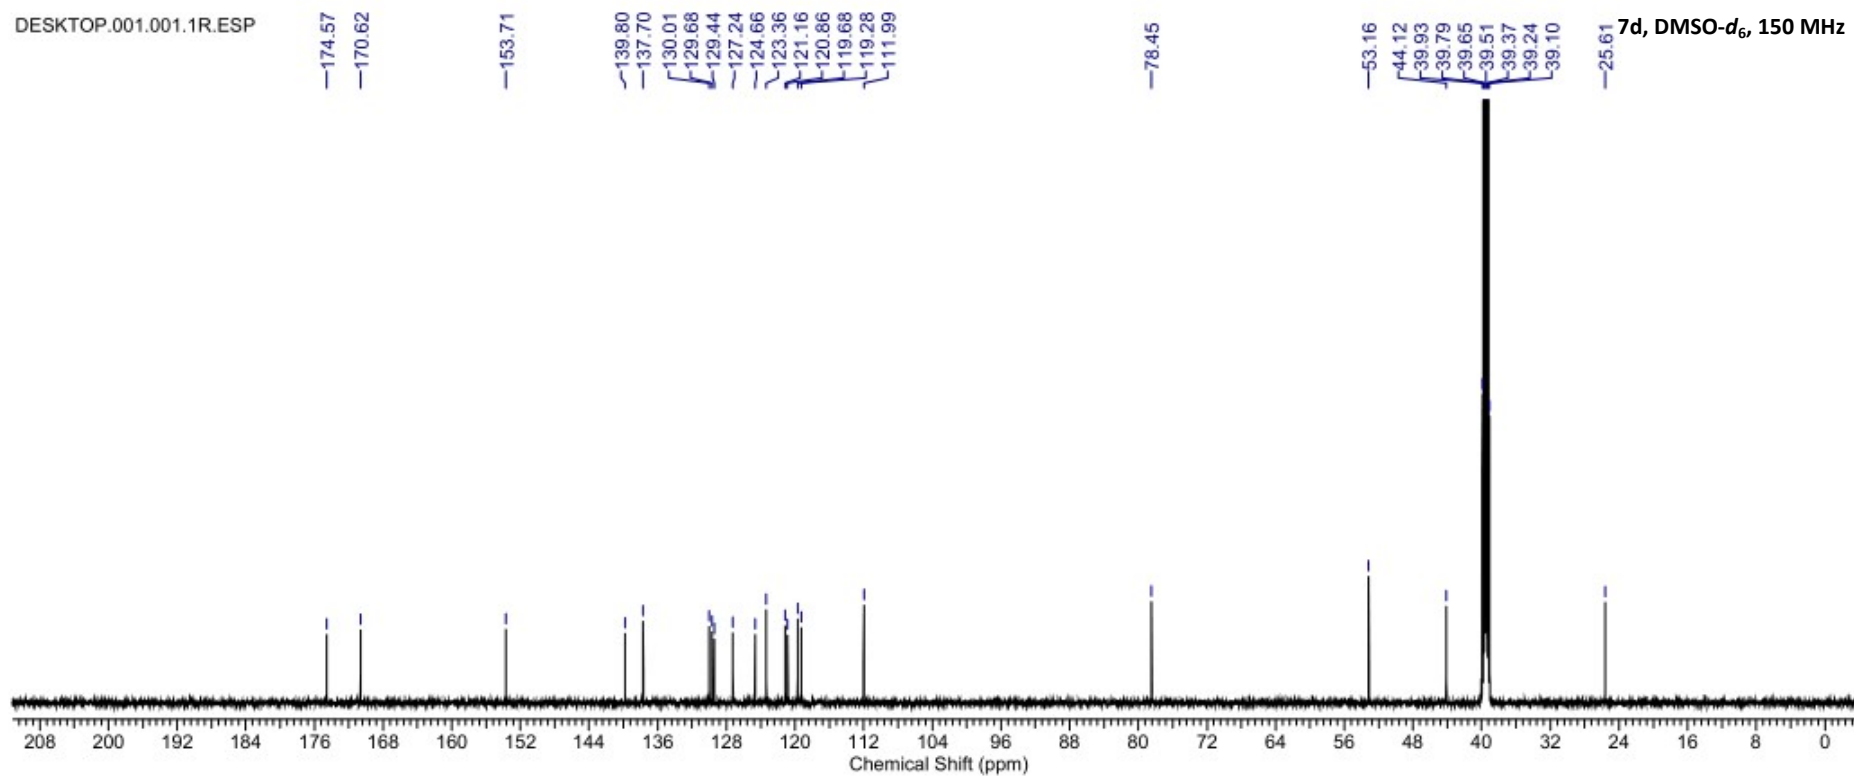

WWF-22365 #23 RT: 0.10 AV: 1 NL: 1.00E9  
T: FTMS + p ESI Full ms [100.0000-1500.0000]

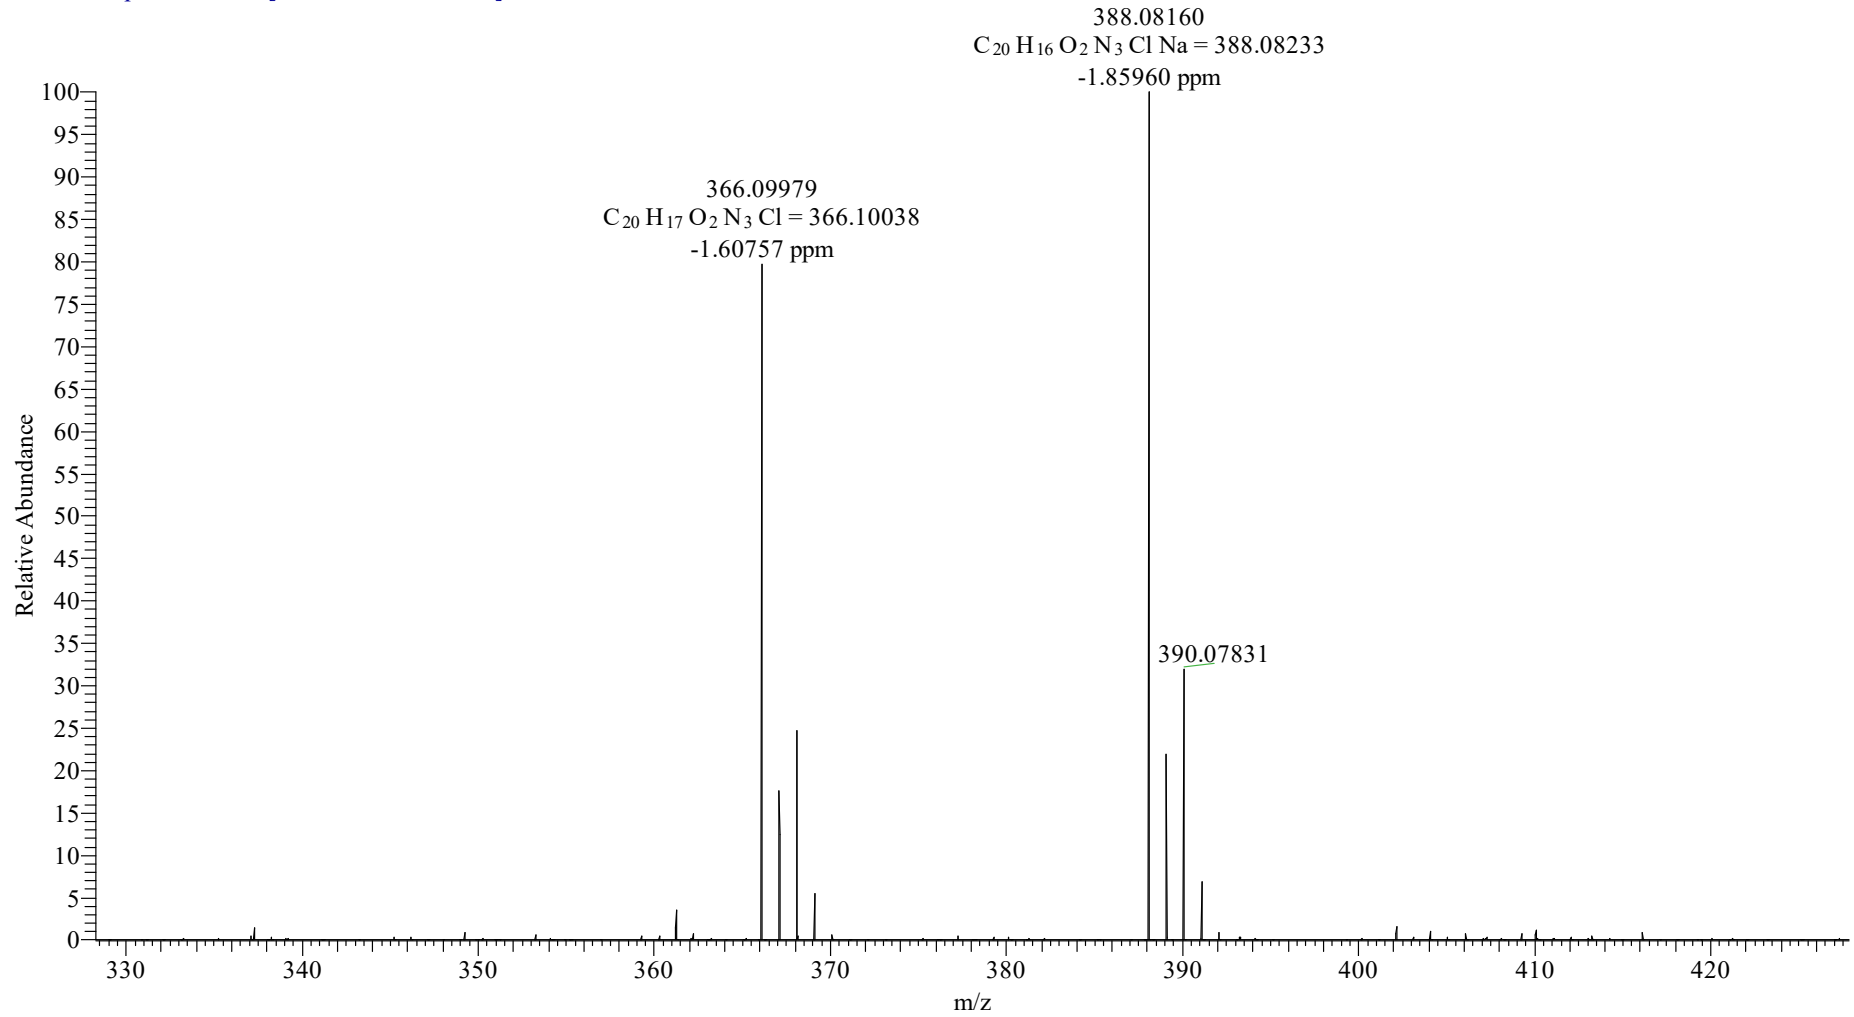

WWF-22411-0325.001.001.1r.esp2

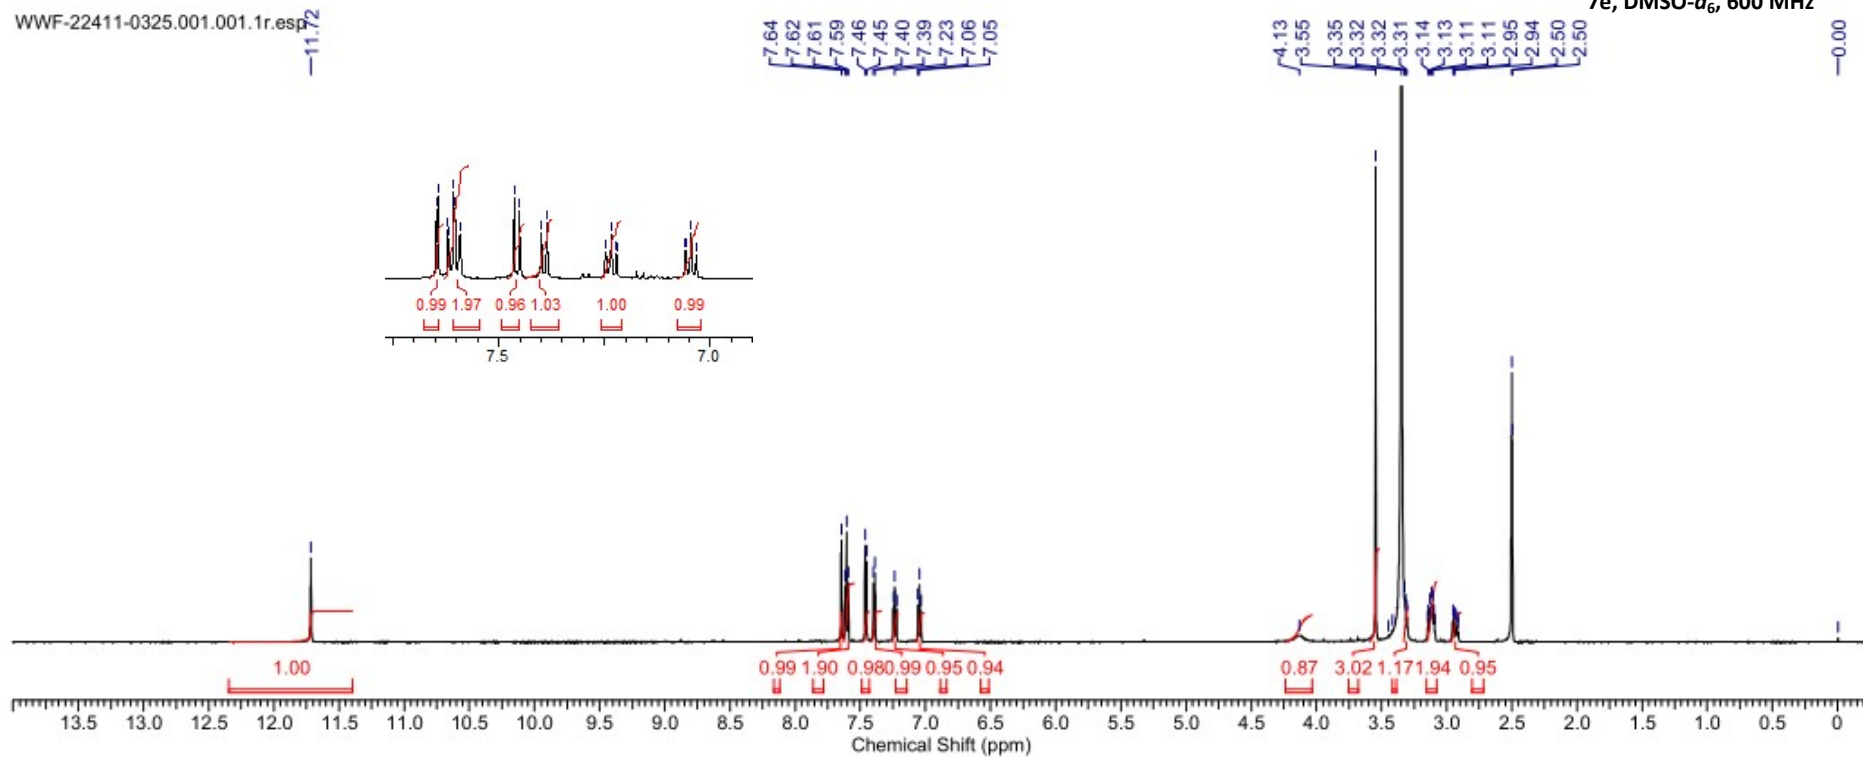

WWF411-002.001.1R.ESP

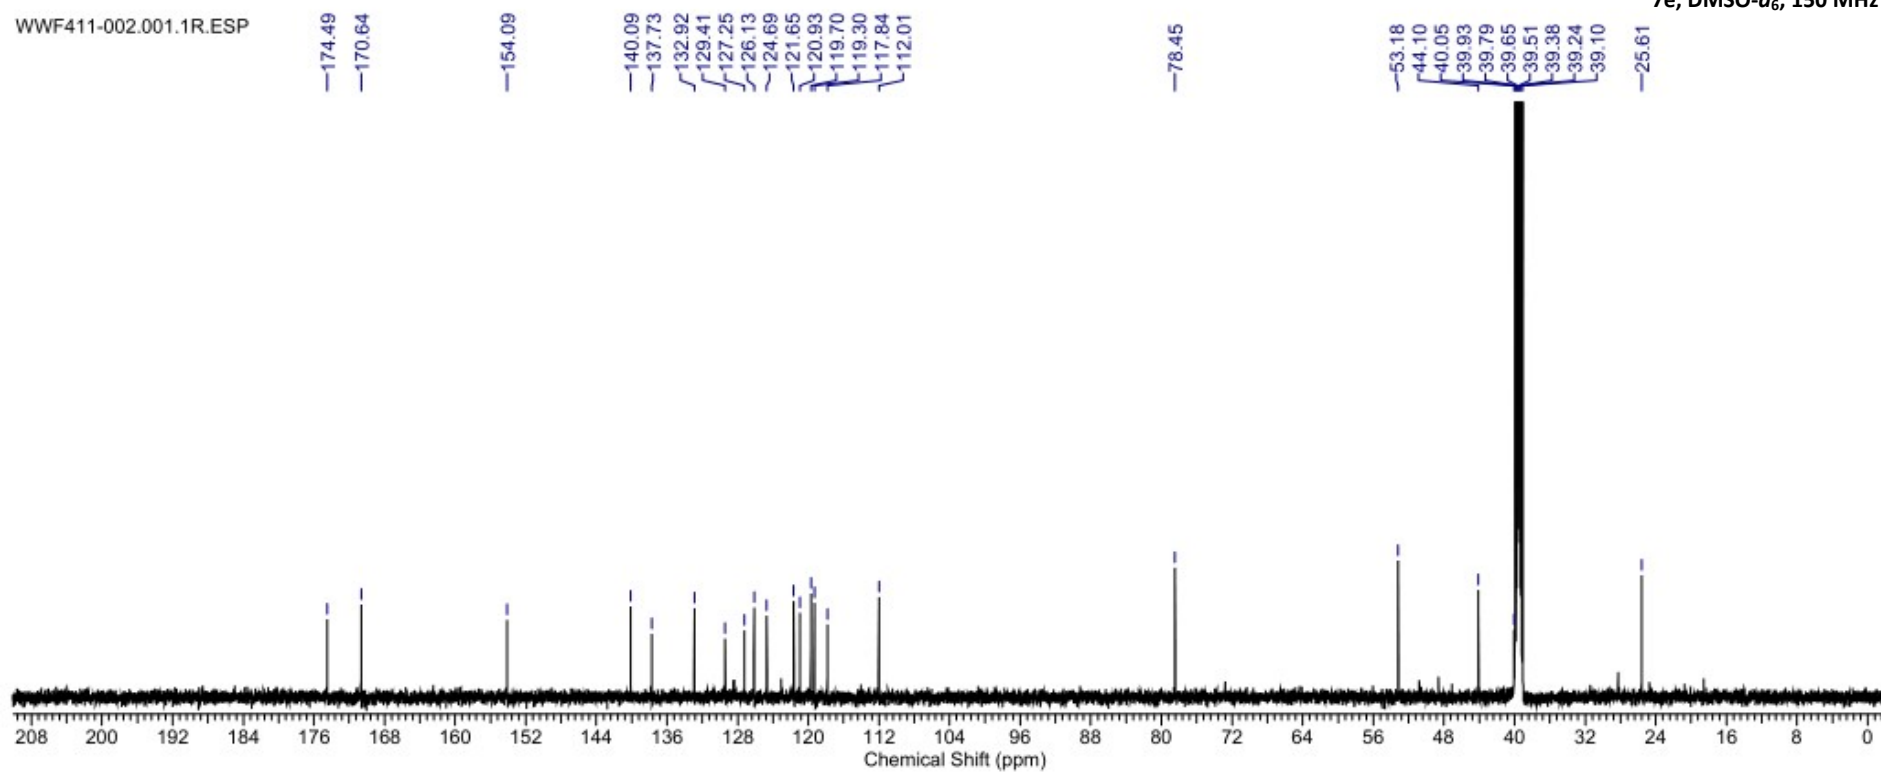

WWF-22411-5 #22 RT: 0.10 AV: 1 NL: 2.97E8  
T: FTMS + p ESI Full ms [100.0000-1500.0000]

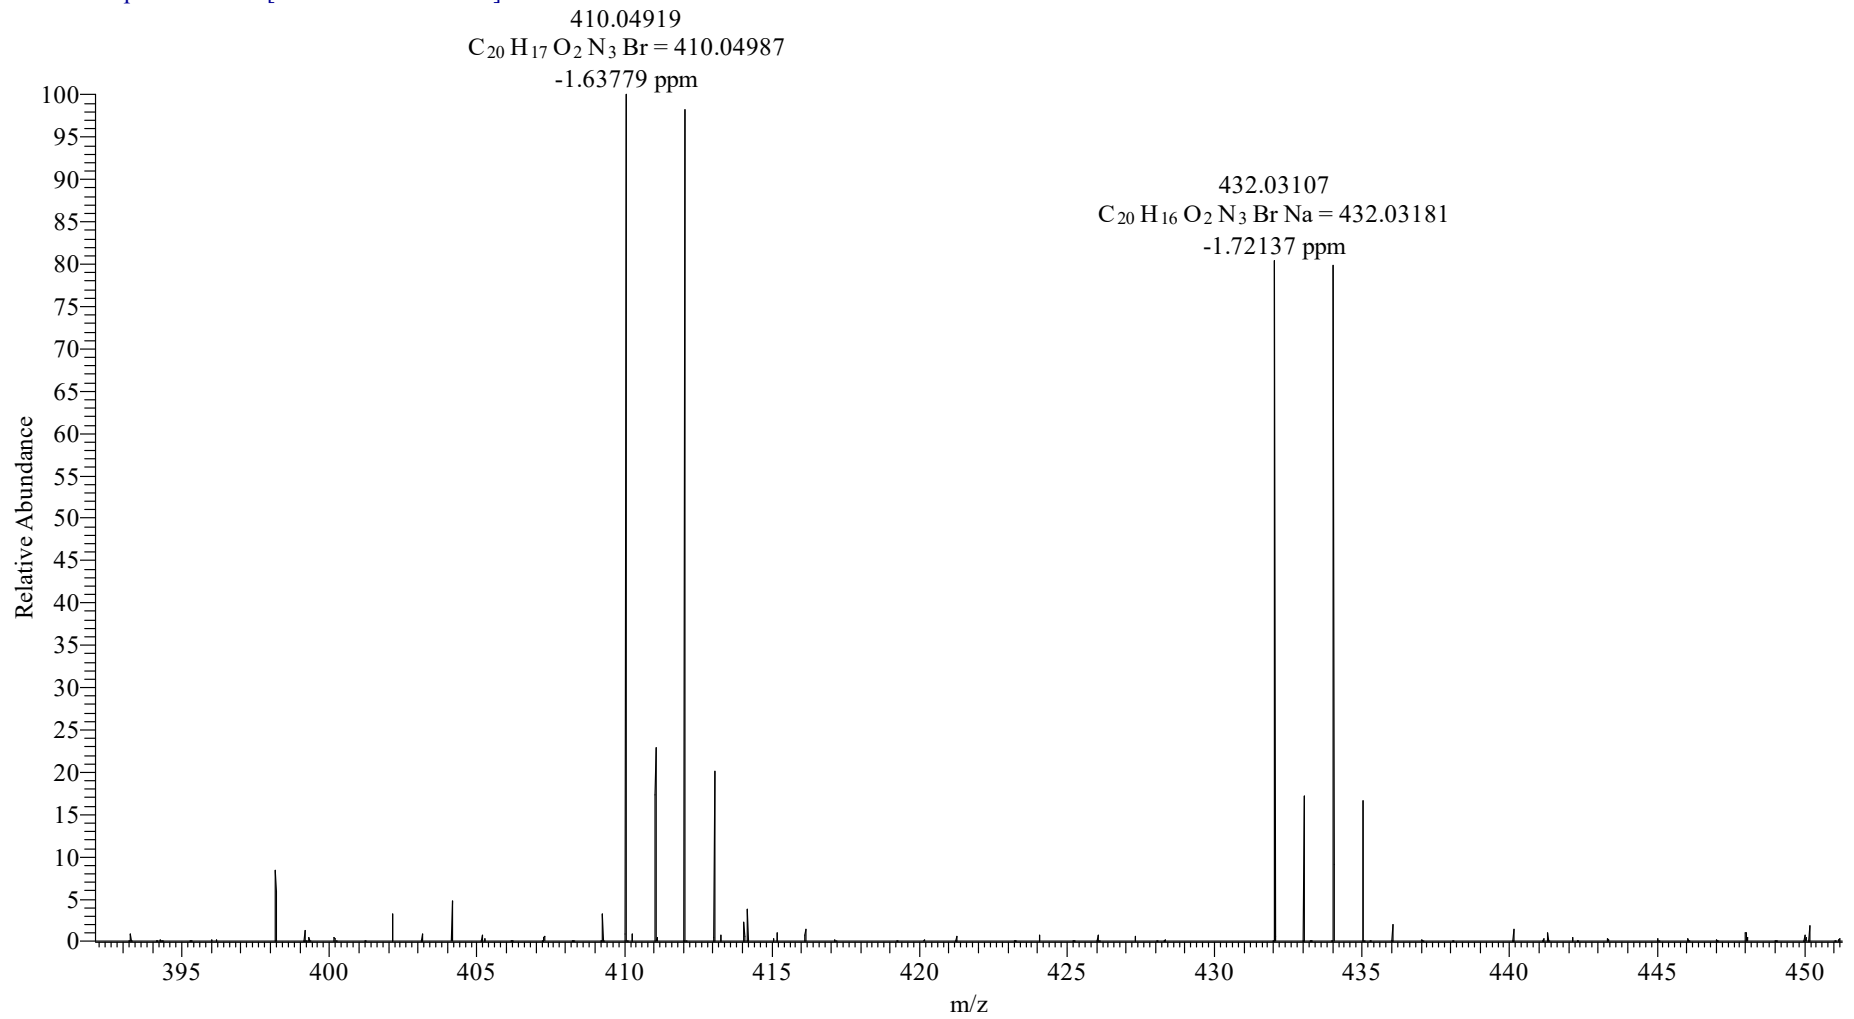

WWF457.001.001.1R.ESP

11.71

7.80  
7.78  
7.77  
7.60  
7.59  
7.40  
7.38  
7.33  
7.32  
7.23  
7.05  
7.04

4.10  
3.54  
3.34  
3.32  
3.31  
3.30  
3.12  
3.11  
3.10  
3.09  
2.94  
2.50  
2.50

7f, DMSO-d<sub>6</sub>, 600 MHz

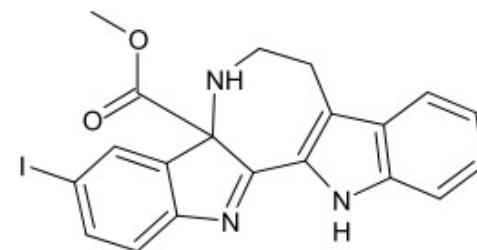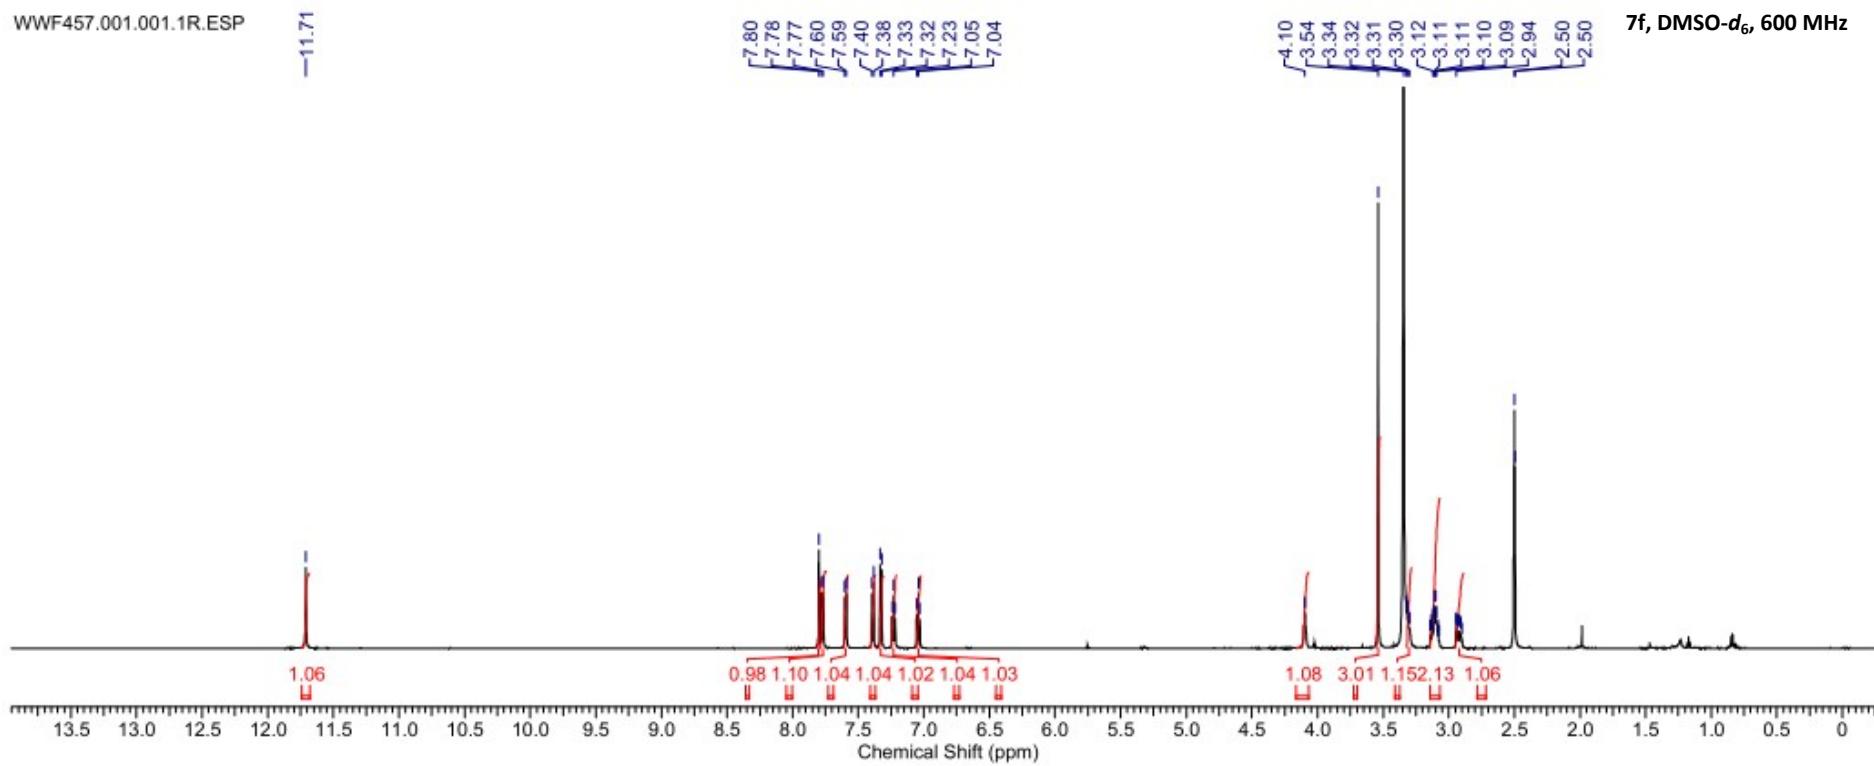



WWF457.002.001.1R.ESP

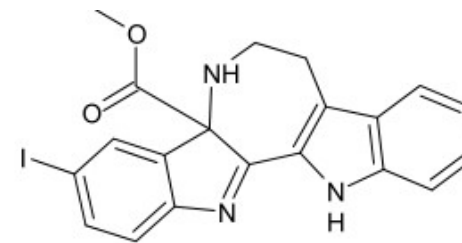

7f, DMSO-*d*<sub>6</sub>, 150 MHz

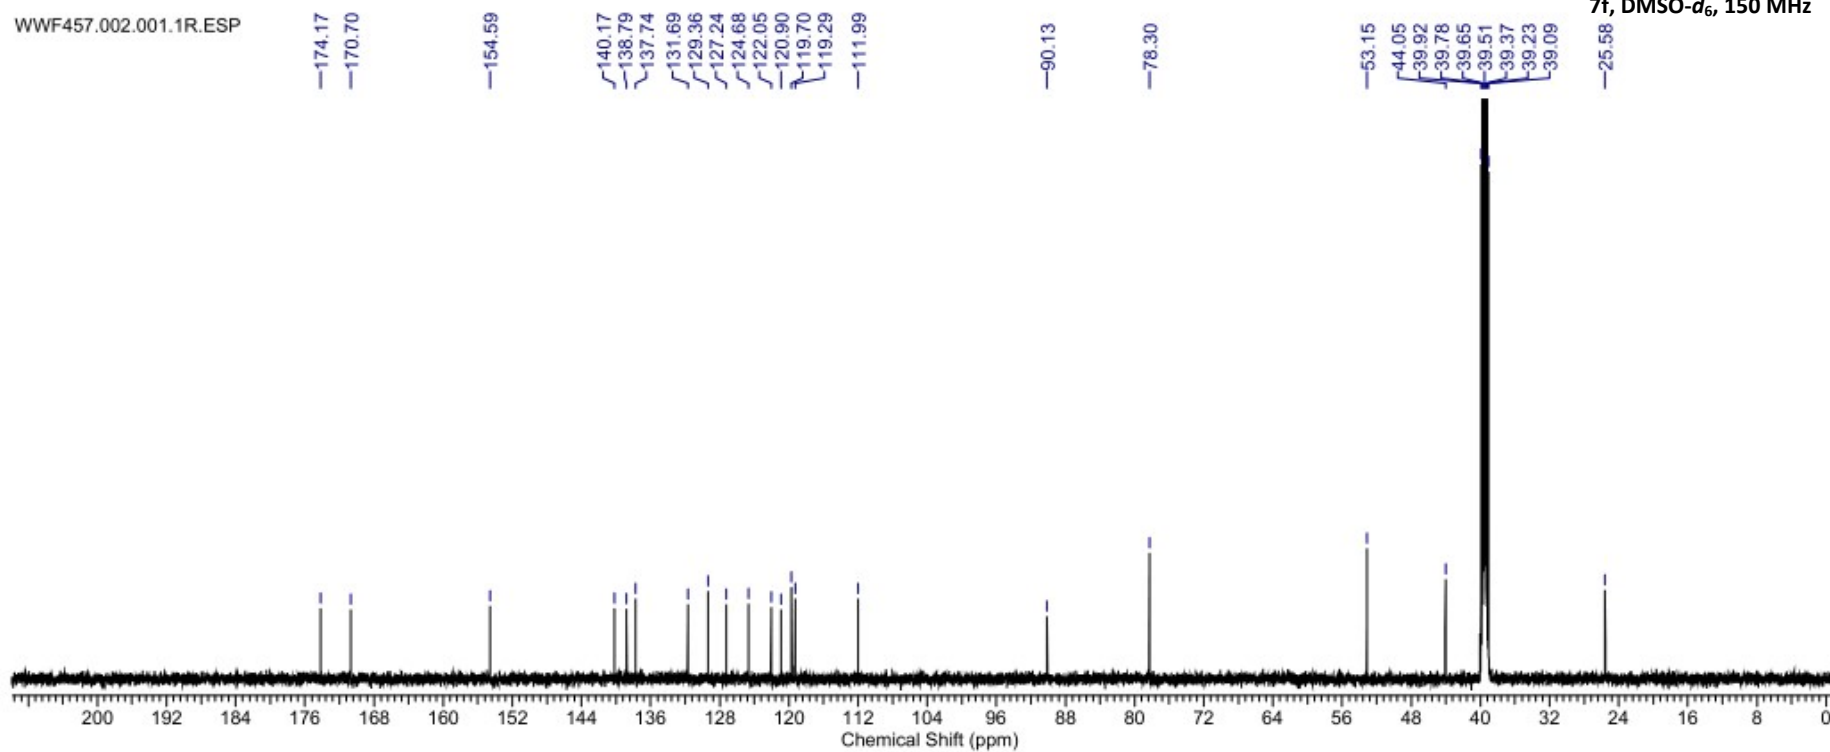

WWF-22457 #24 RT: 0.10 AV: 1 NL: 8.84E8  
T: FTMS + p ESI Full ms [100.0000-1500.0000]

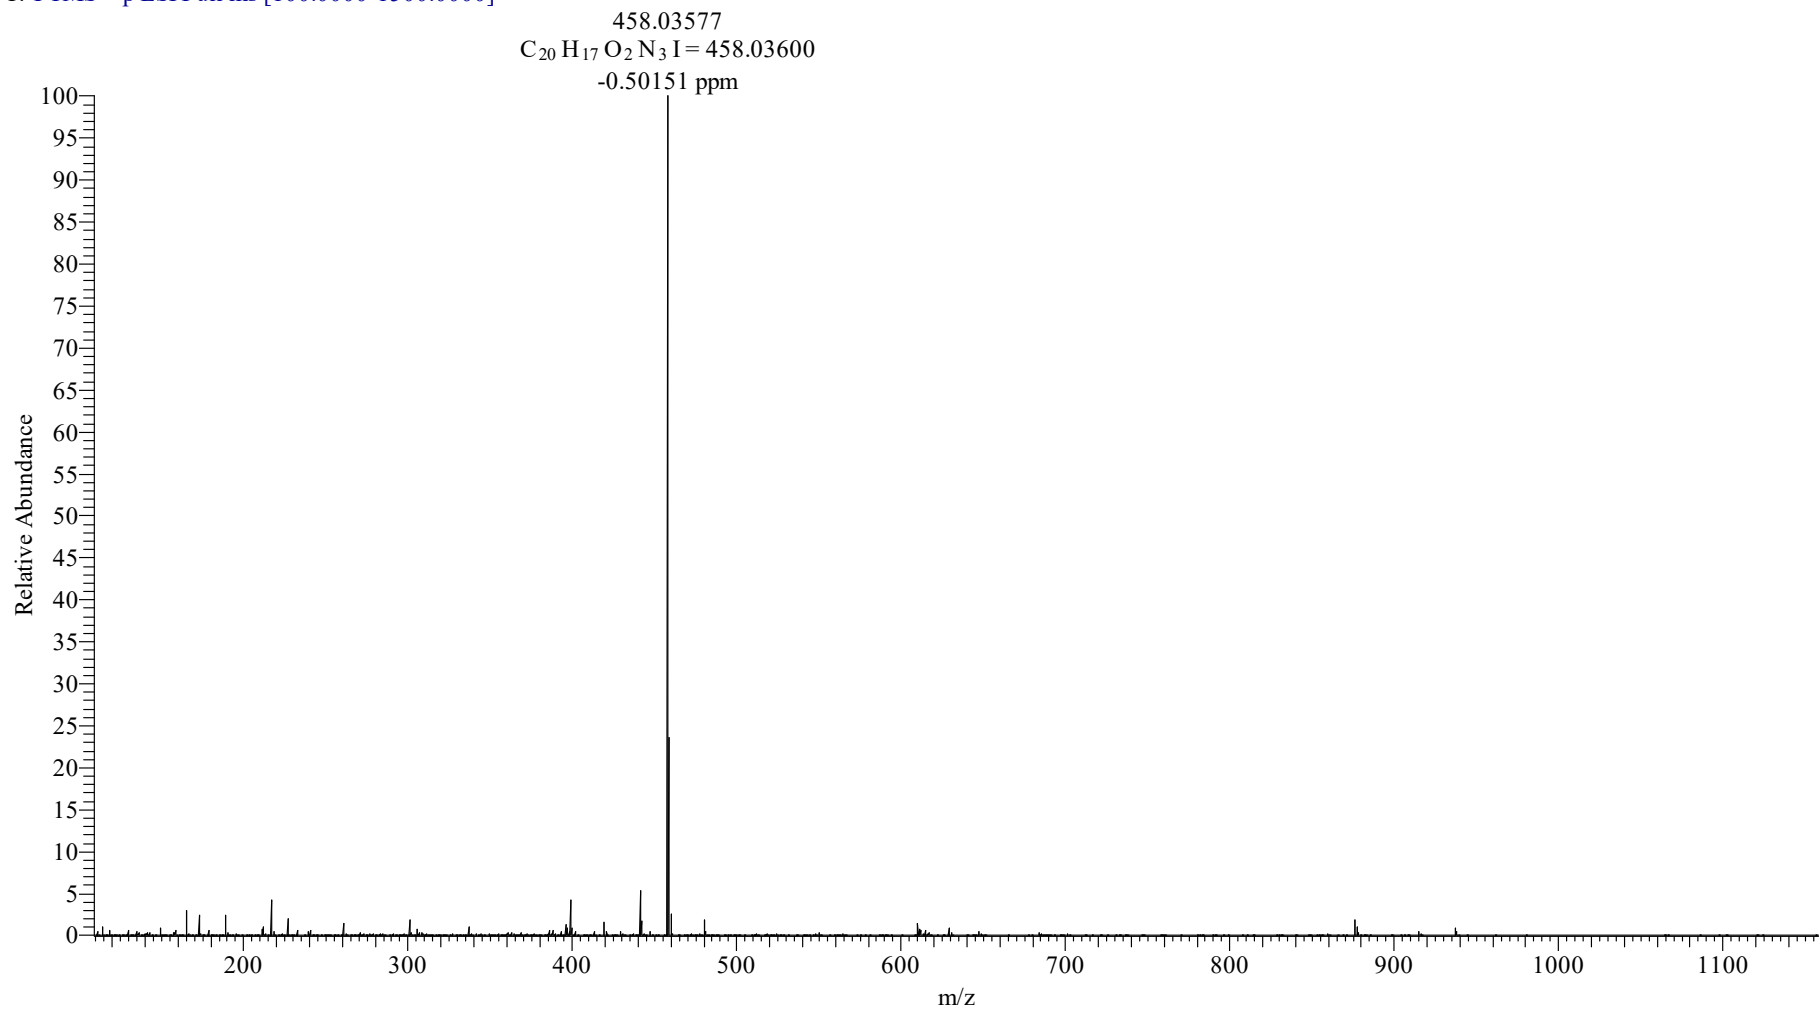

WWF376.001.001.1R.ESP

11.71

7.80  
7.78  
7.77  
7.60  
7.59  
7.40  
7.38  
7.33  
7.32  
7.23  
7.05  
7.04

4.10  
4.10  
4.09  
3.94  
3.34  
3.31  
3.30  
3.12  
3.11  
3.10  
3.09  
2.94  
2.51  
2.50  
2.50

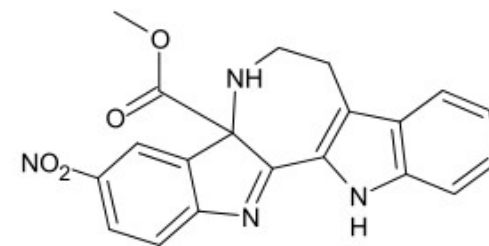

7g, DMSO-d<sub>6</sub>, 600 MHz

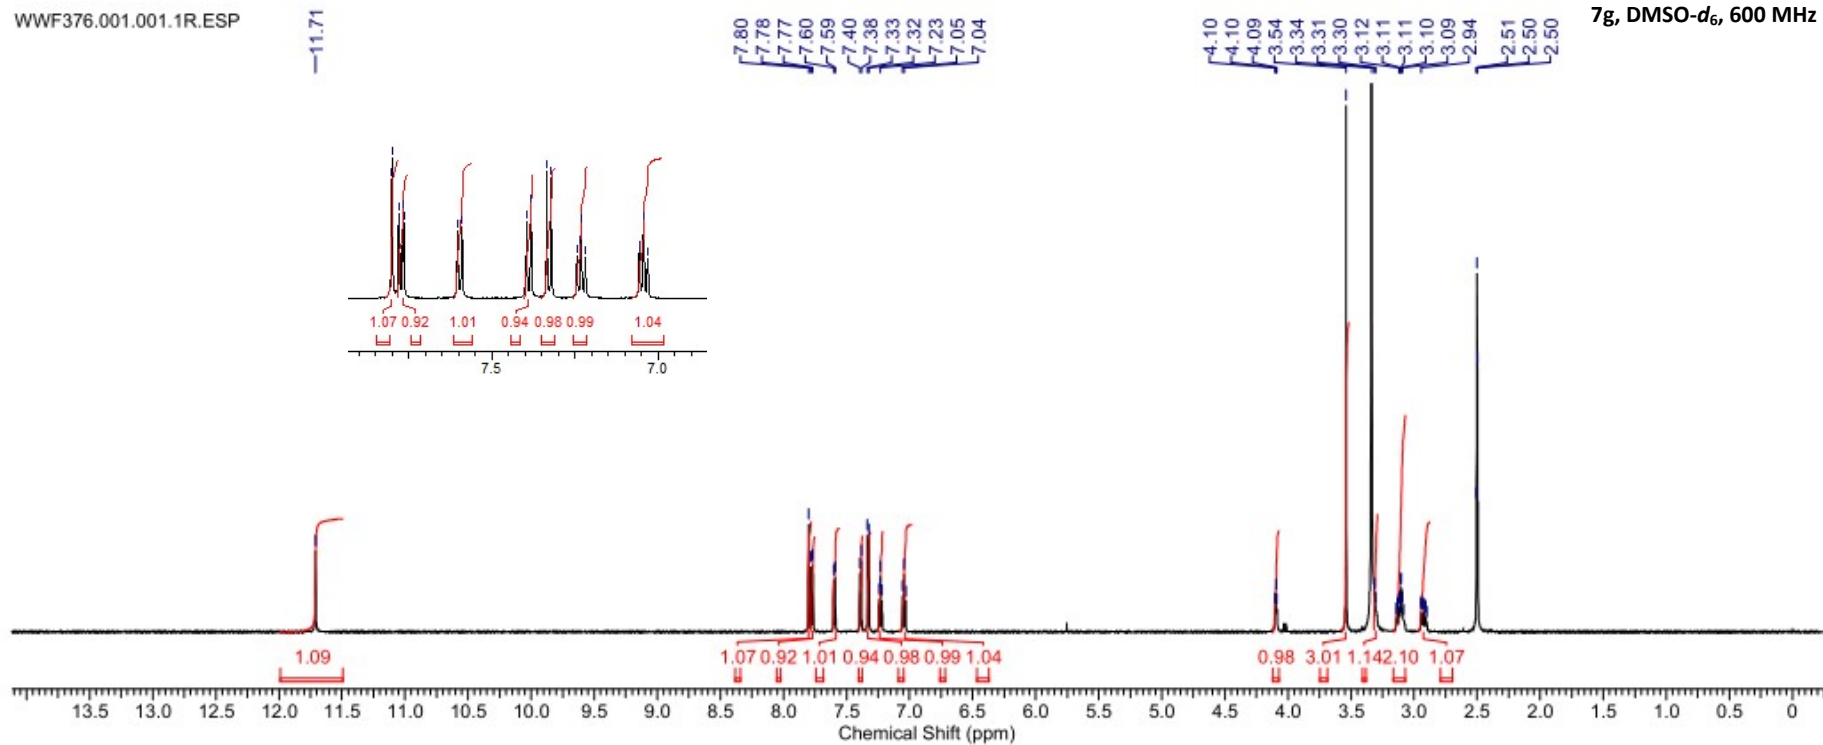

2.002.001.1R.ESP

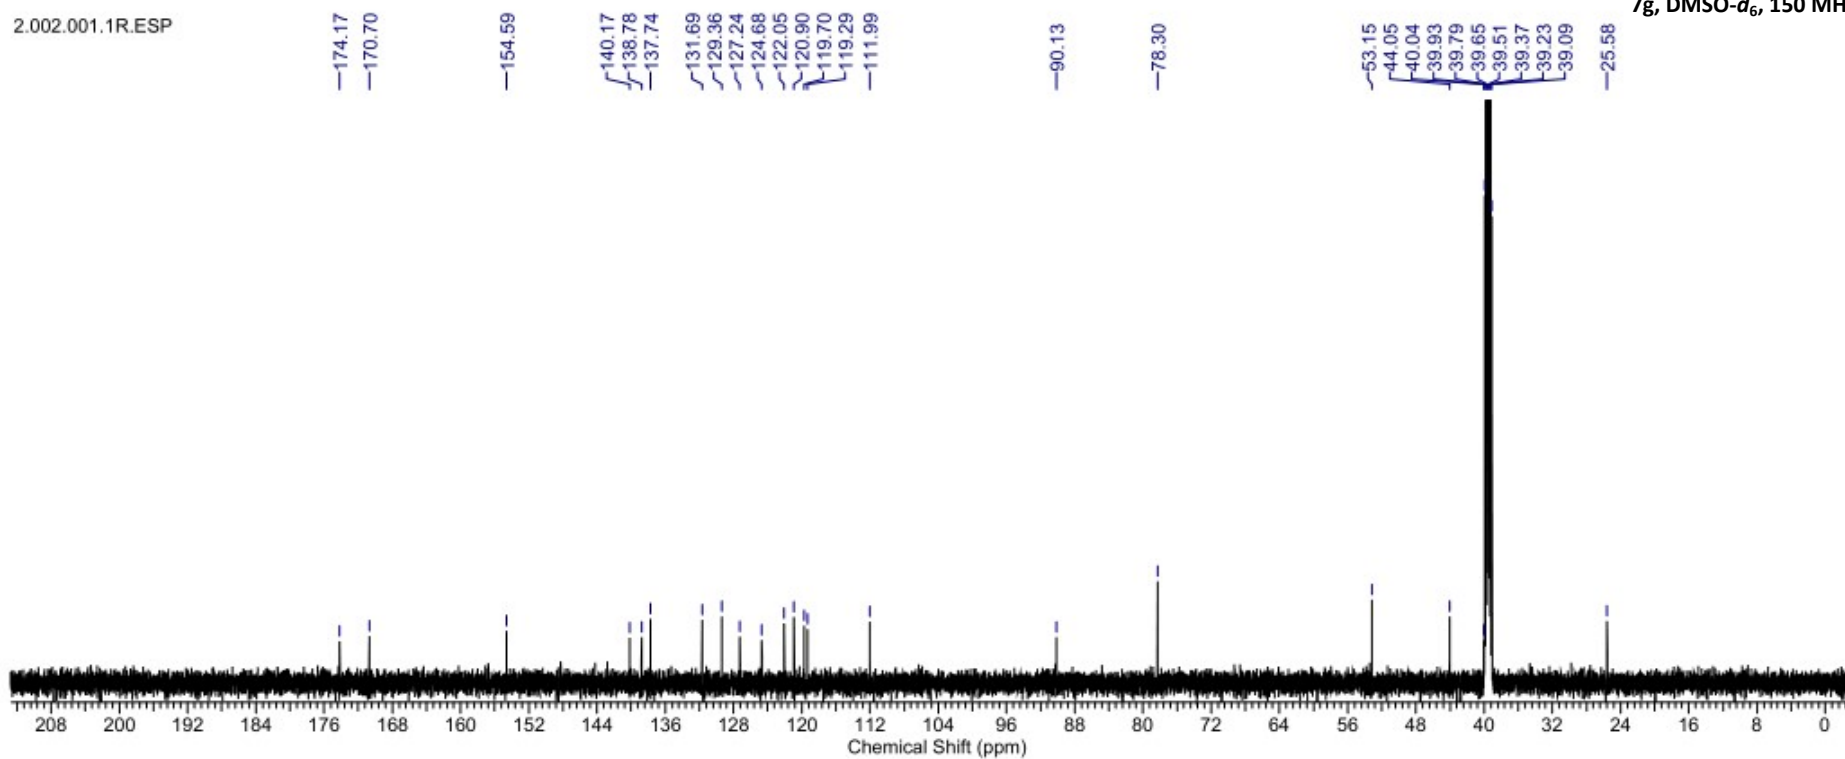

WWF-22376 #24 RT: 0.10 AV: 1 NL: 2.39E8  
T: FTMS + p ESI Full ms [100.0000-1500.0000]

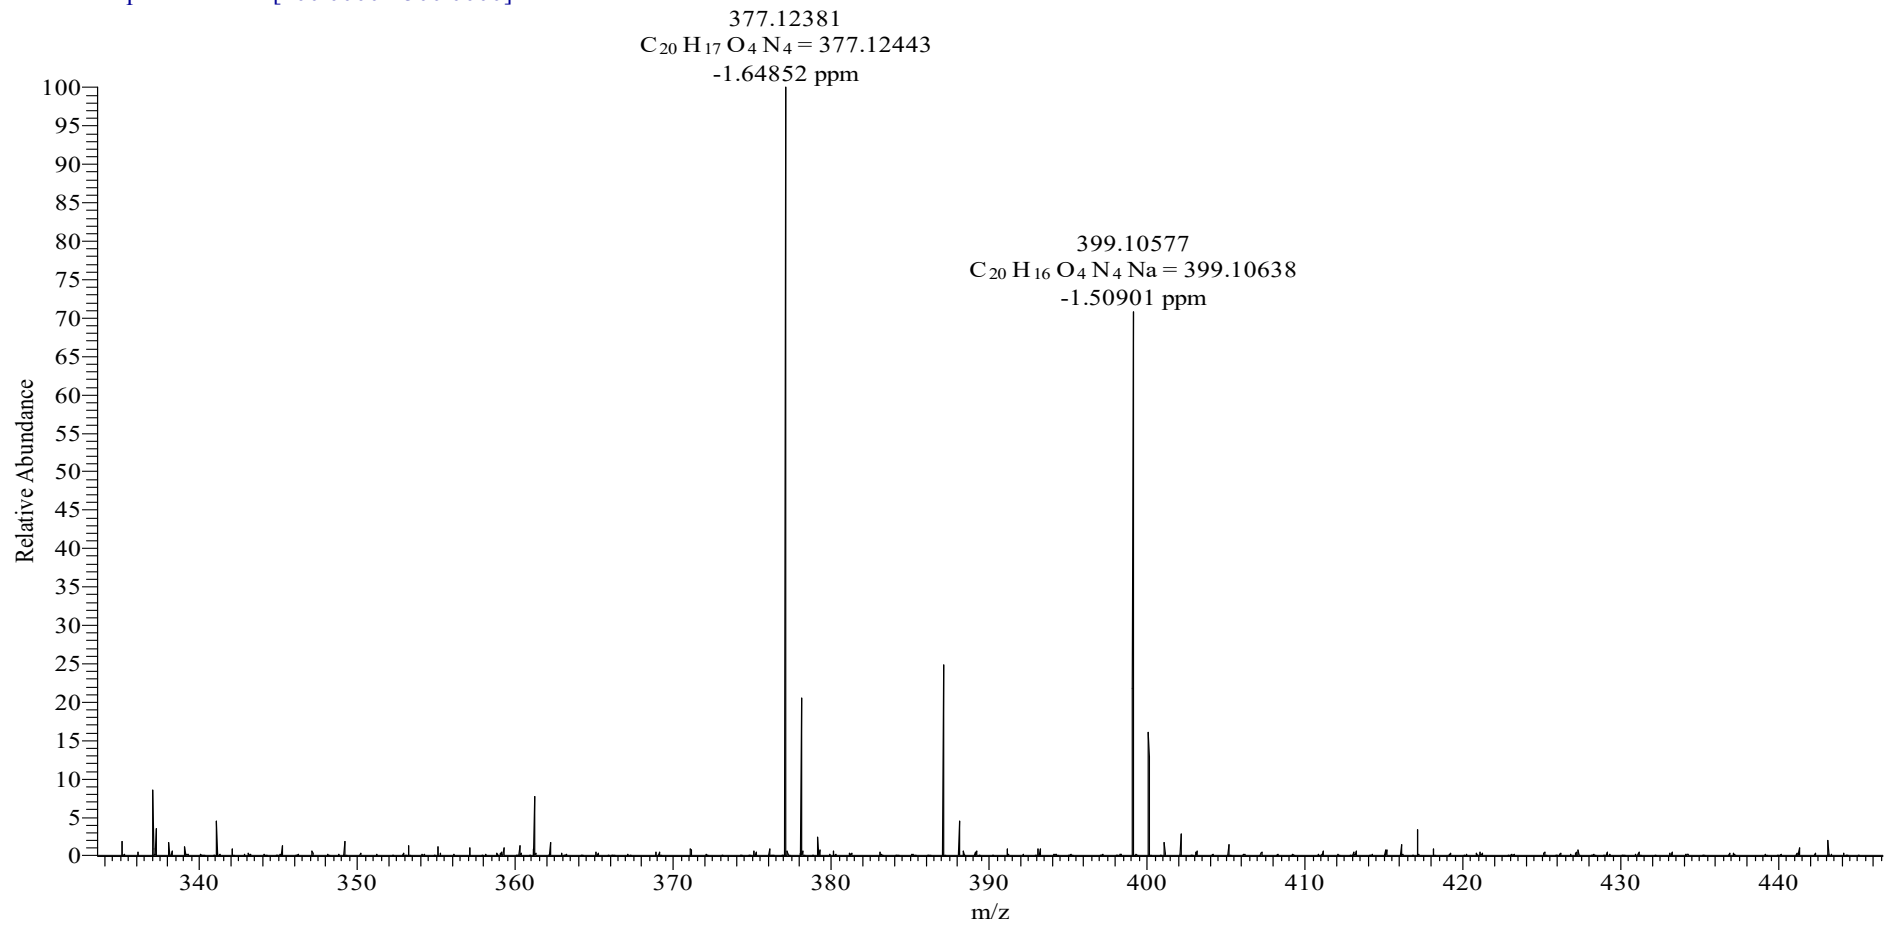

WWF-20361.001.001.1R.ESP

11.55

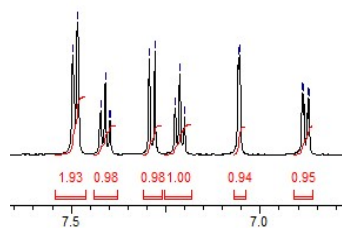

7.50  
7.48  
7.41  
7.29  
7.28  
7.23  
7.21  
7.05  
6.89  
6.89  
6.87

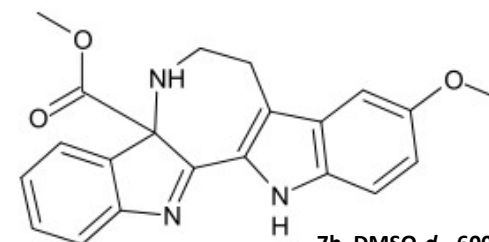

7h, DMSO-d<sub>6</sub>, 600 MHz

3.93  
3.78  
3.51  
3.33  
3.12  
3.12  
3.11  
3.10  
3.09  
3.09  
3.08  
2.92  
2.91  
2.50

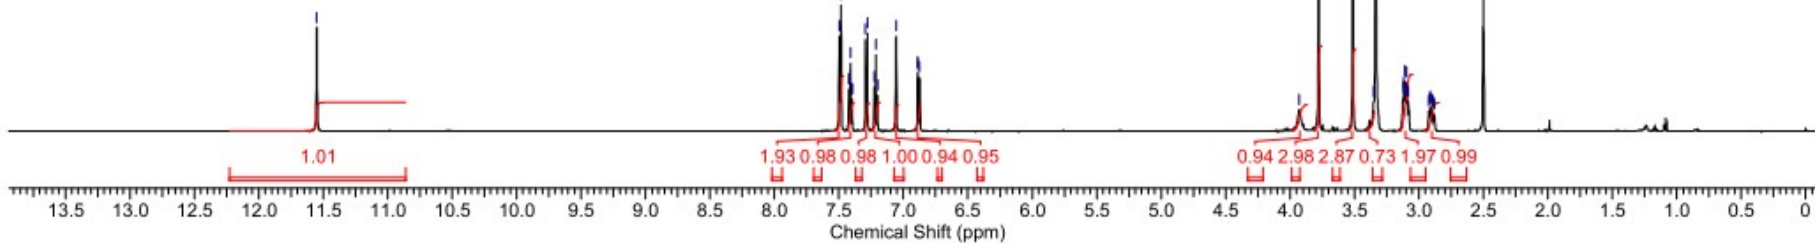

WWF-20361.002.001.1R.ESP

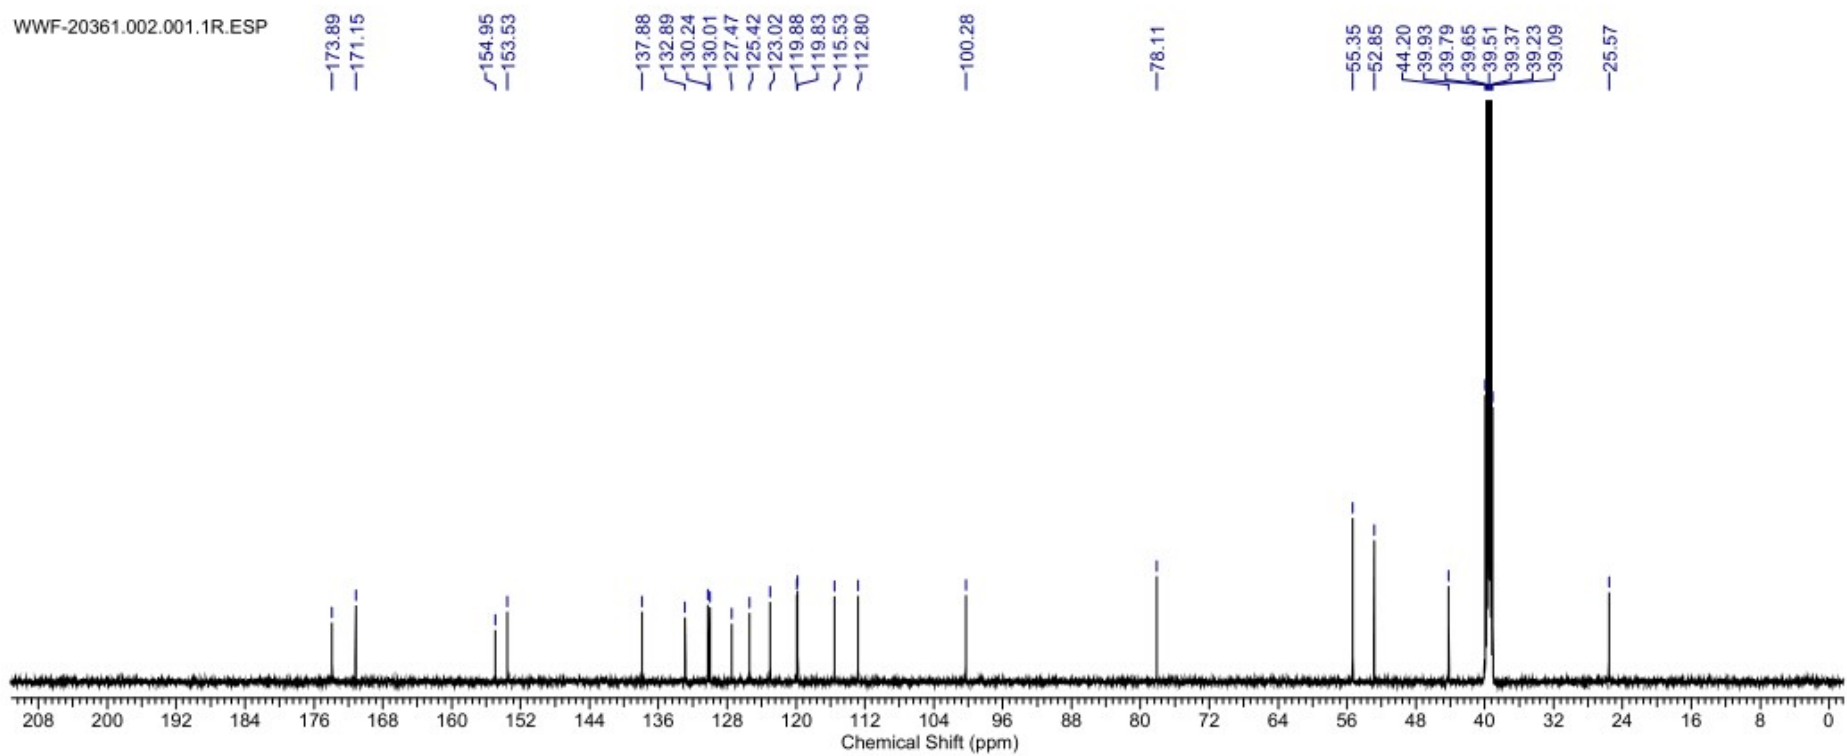

XDL-21361 #28 RT: 0.12 AV: 1 NL: 2.16E6  
T: FTMS + p ESI Full ms [100.0000-1500.0000]

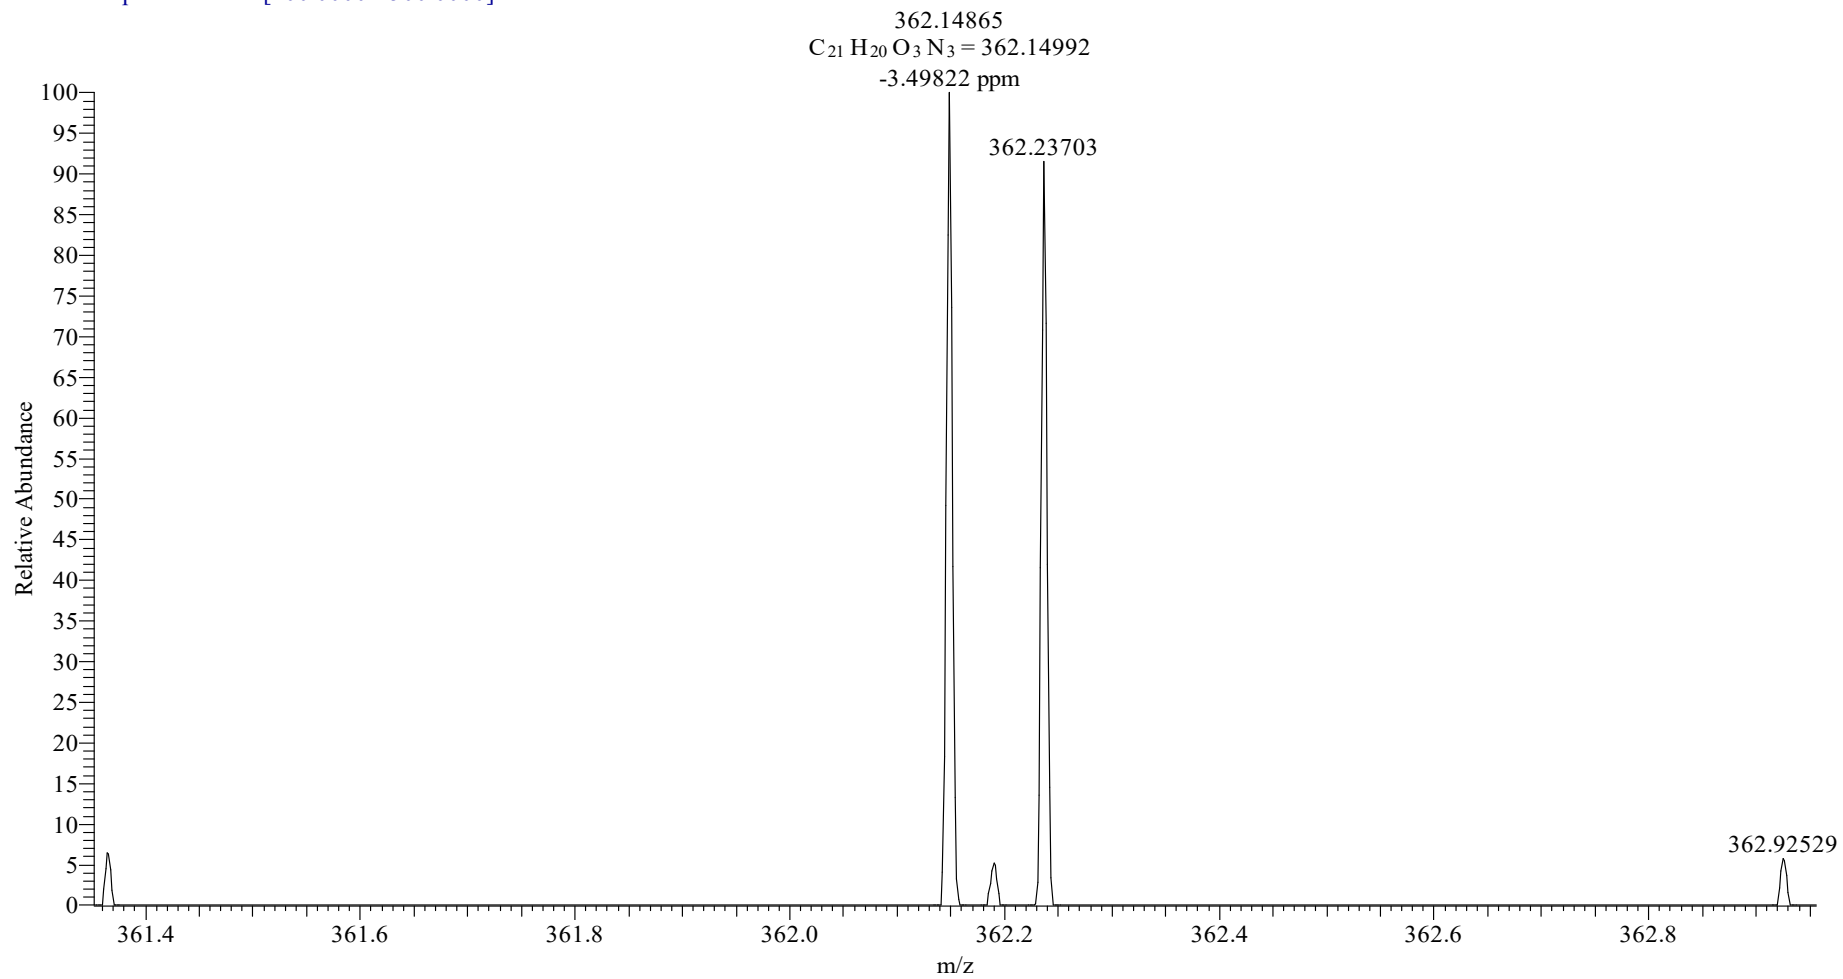



WWF-22365-1.001.001.1R.ESF

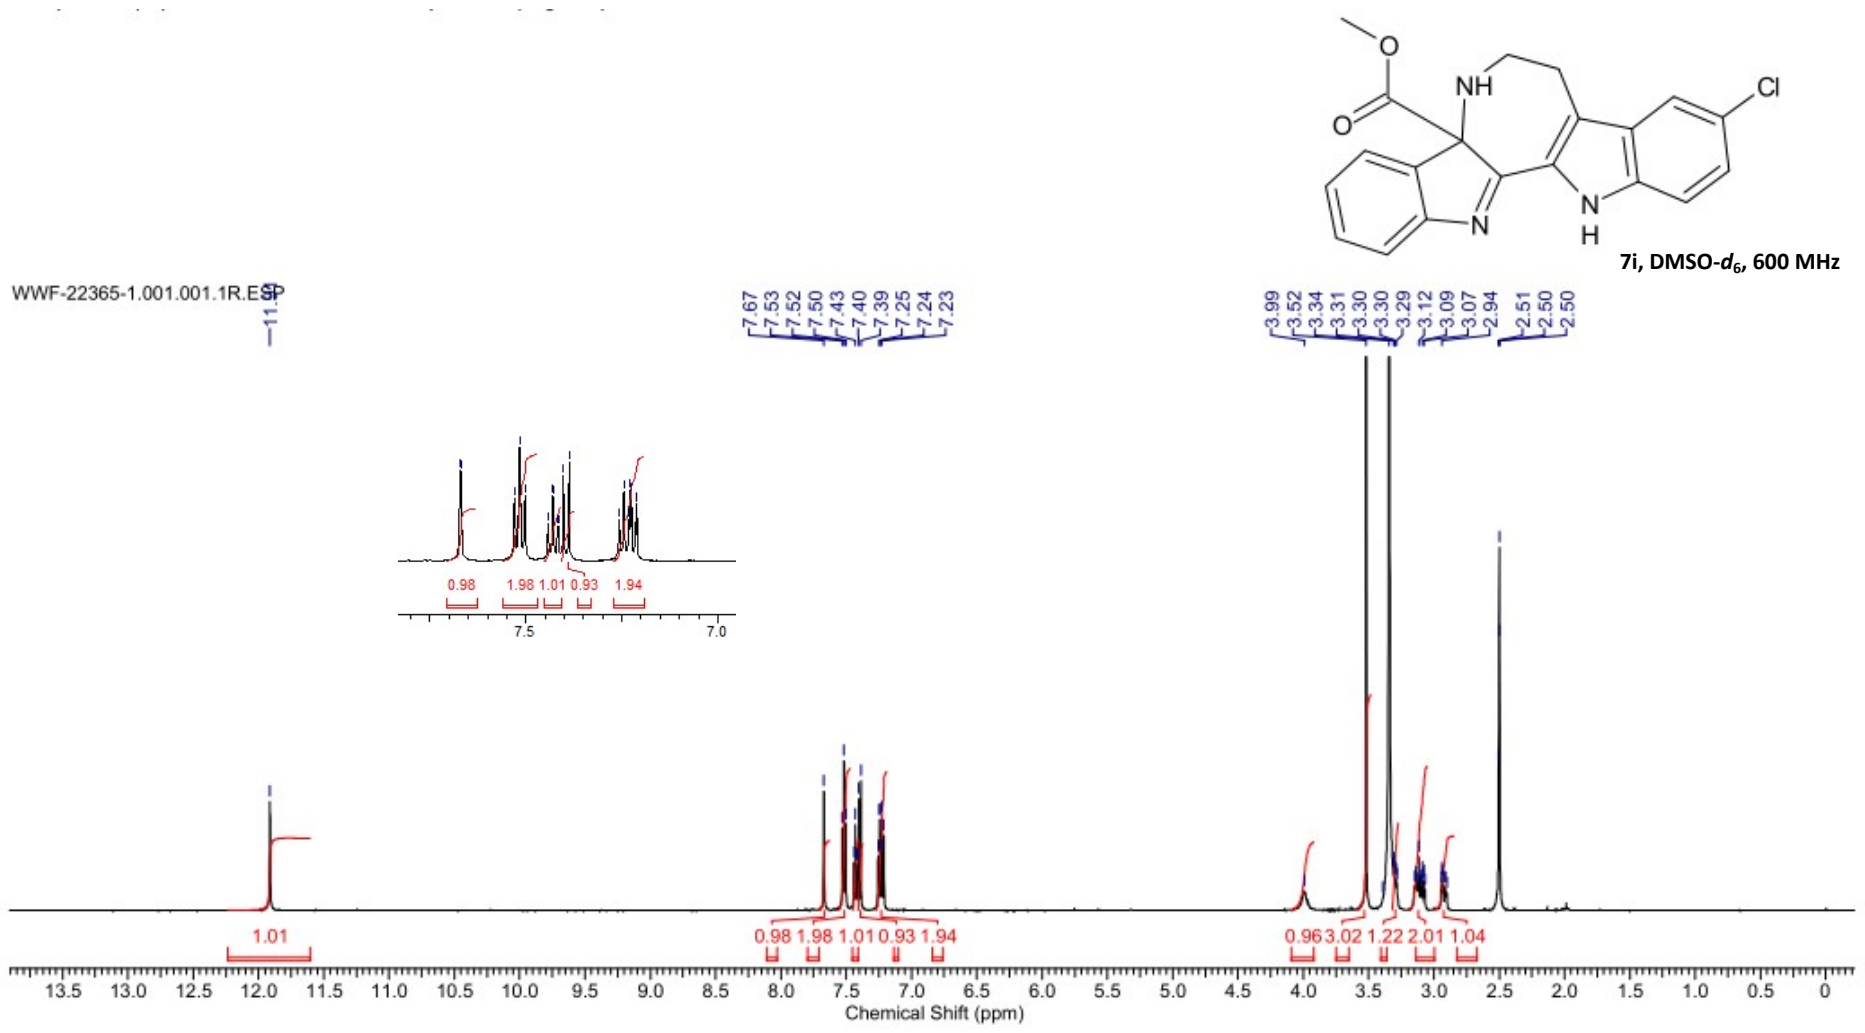

2.001.001.1R.ESP

—173.95  
—170.95

—154.67

—137.79  
—135.89  
—131.21  
—130.13  
—128.32  
—125.85  
—124.31  
—123.86  
—123.17  
—120.13  
—119.56  
—118.86  
—113.51

—78.28

—52.93  
—44.20  
—39.92  
—39.78  
—39.65  
—39.51  
—39.37  
—39.23  
—39.09

7i, DMSO-*d*<sub>6</sub>, 150 MHz

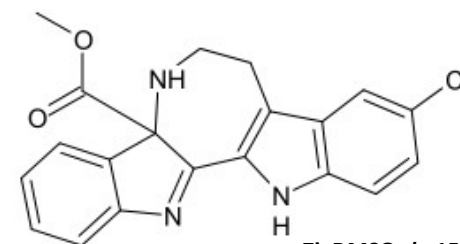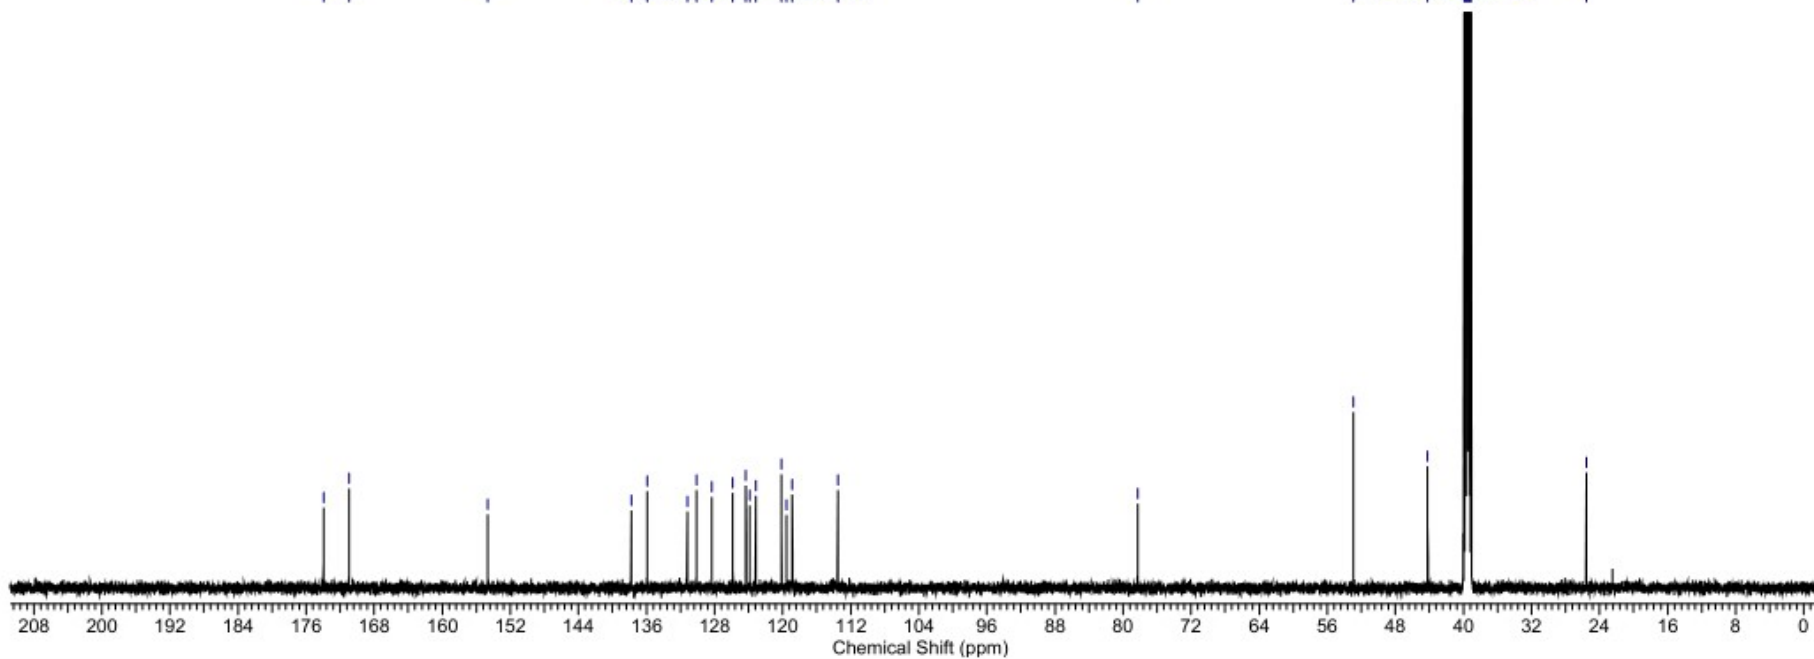

WWF-22365 #30 RT: 0.13 AV: 1 NL: 5.65E8  
T: FTMS + p ESI Full ms [100.0000-1500.0000]

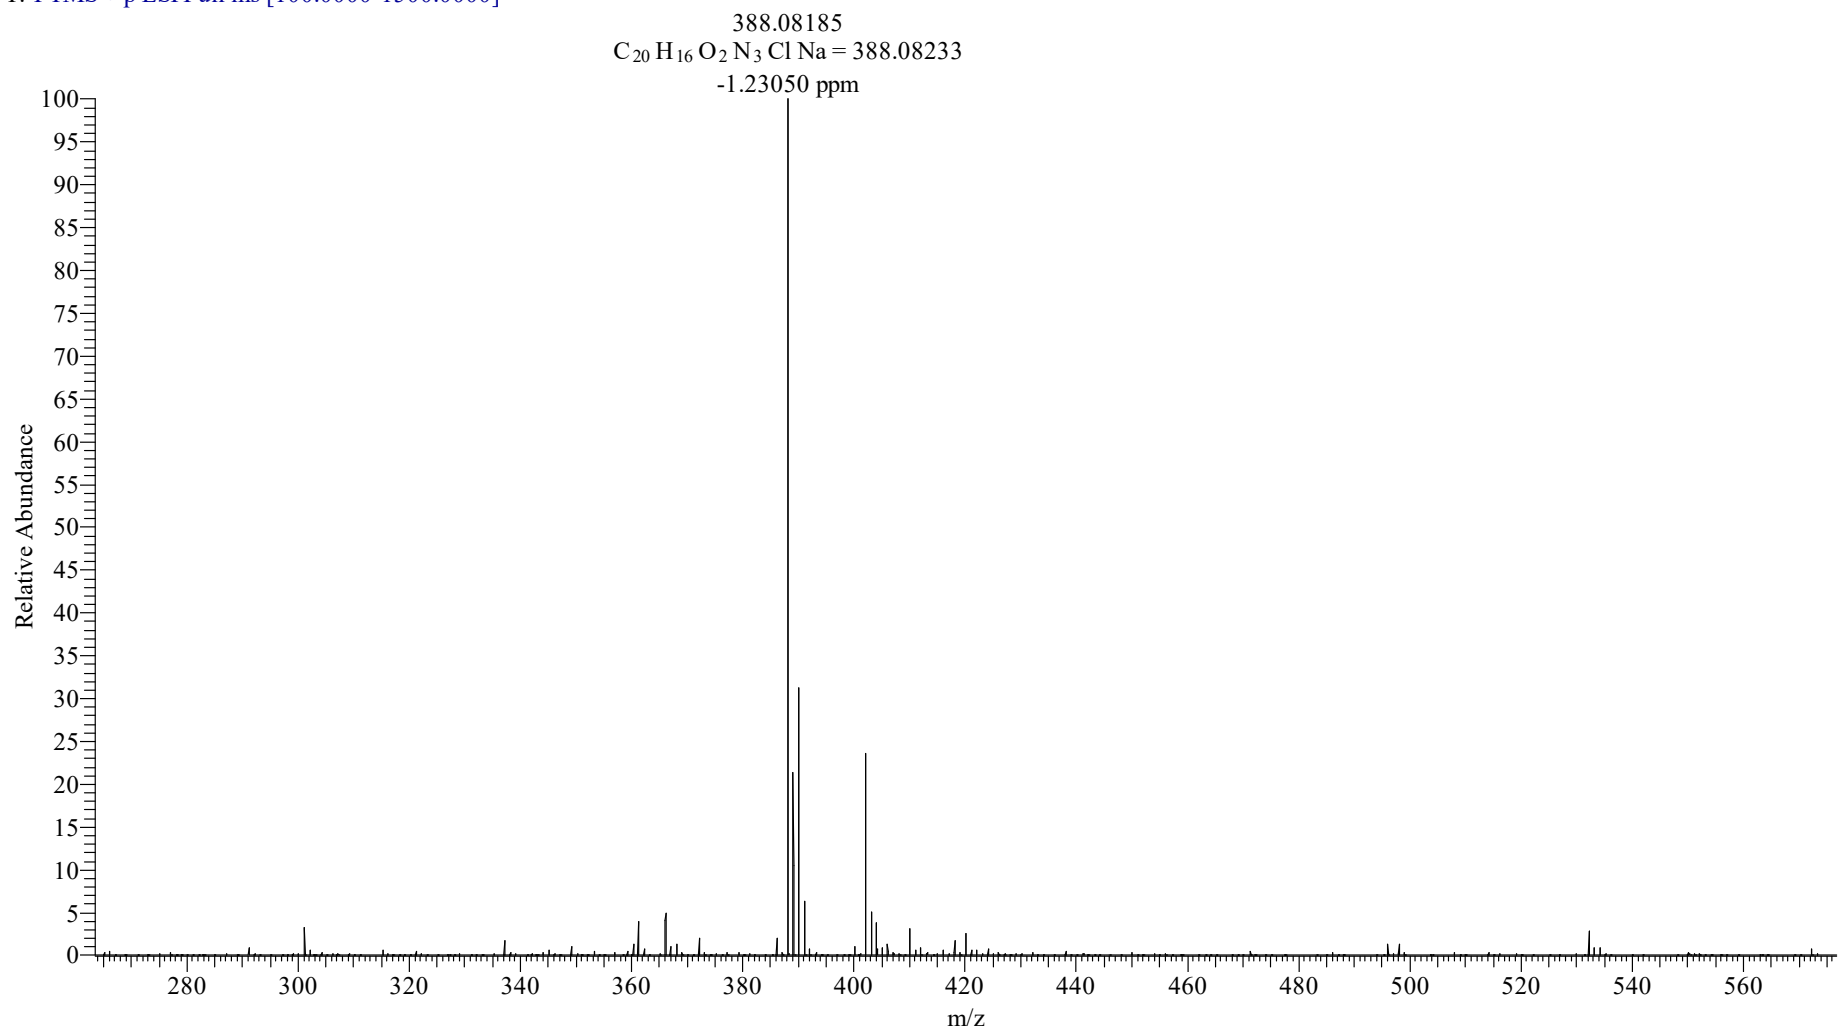

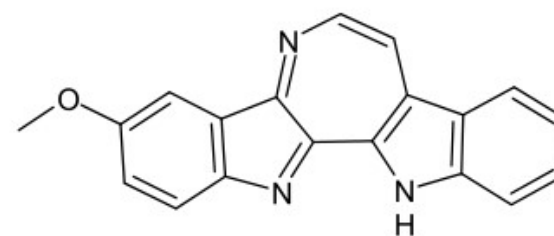

iheyamine A (1) -Free Base,  
CDCl<sub>3</sub>, 600 MHz

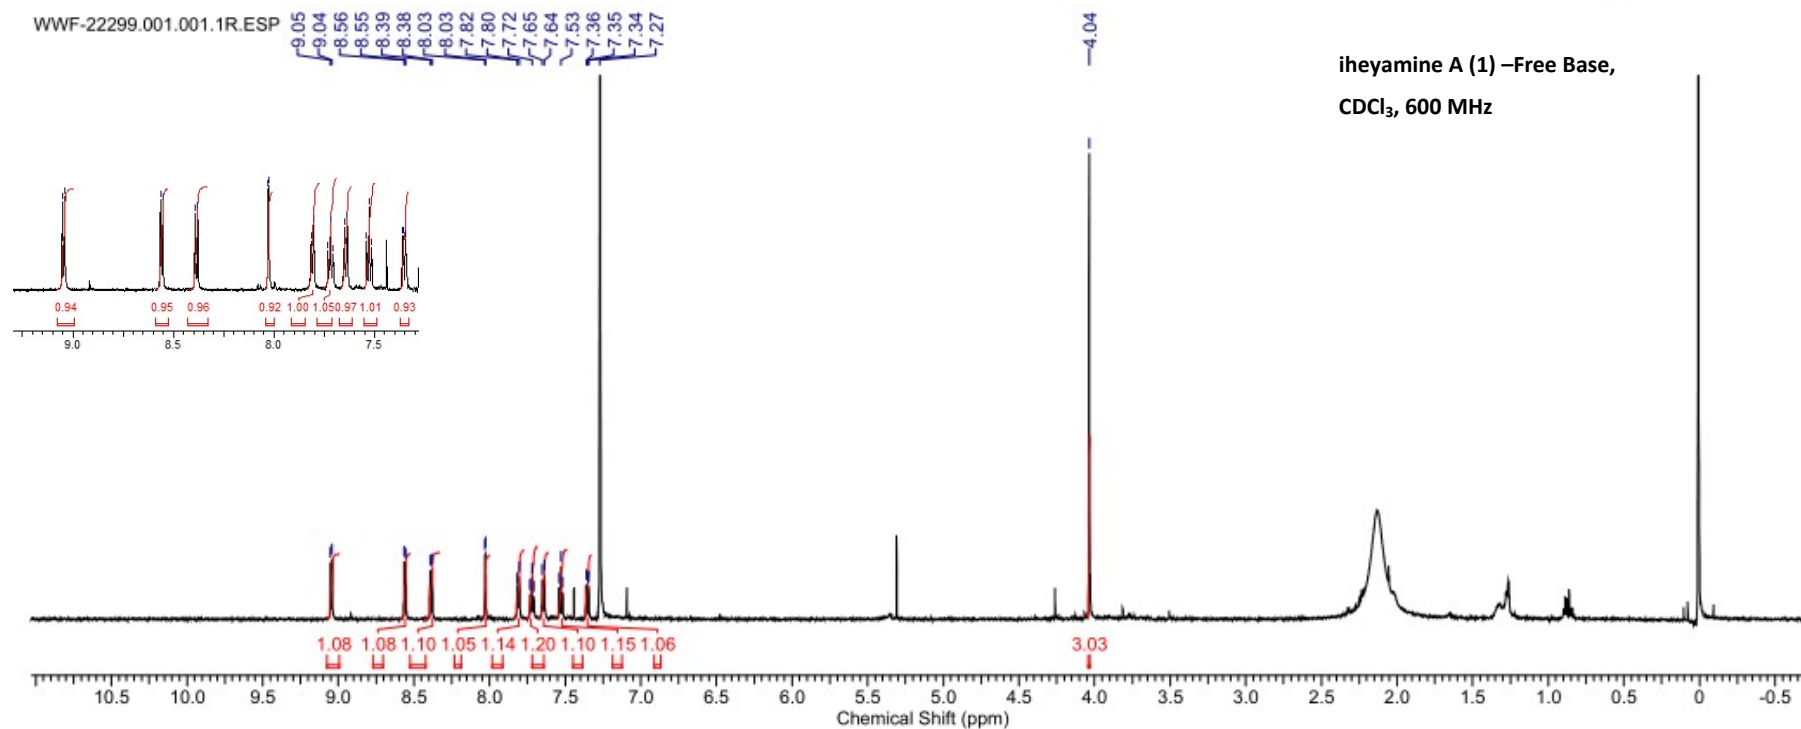

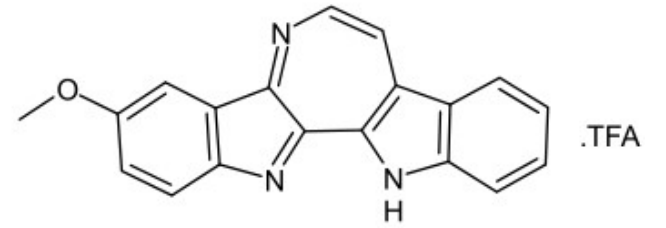

iheyamine A (1)-TFA Salt,  
CDCl<sub>3</sub>, 600 MHz

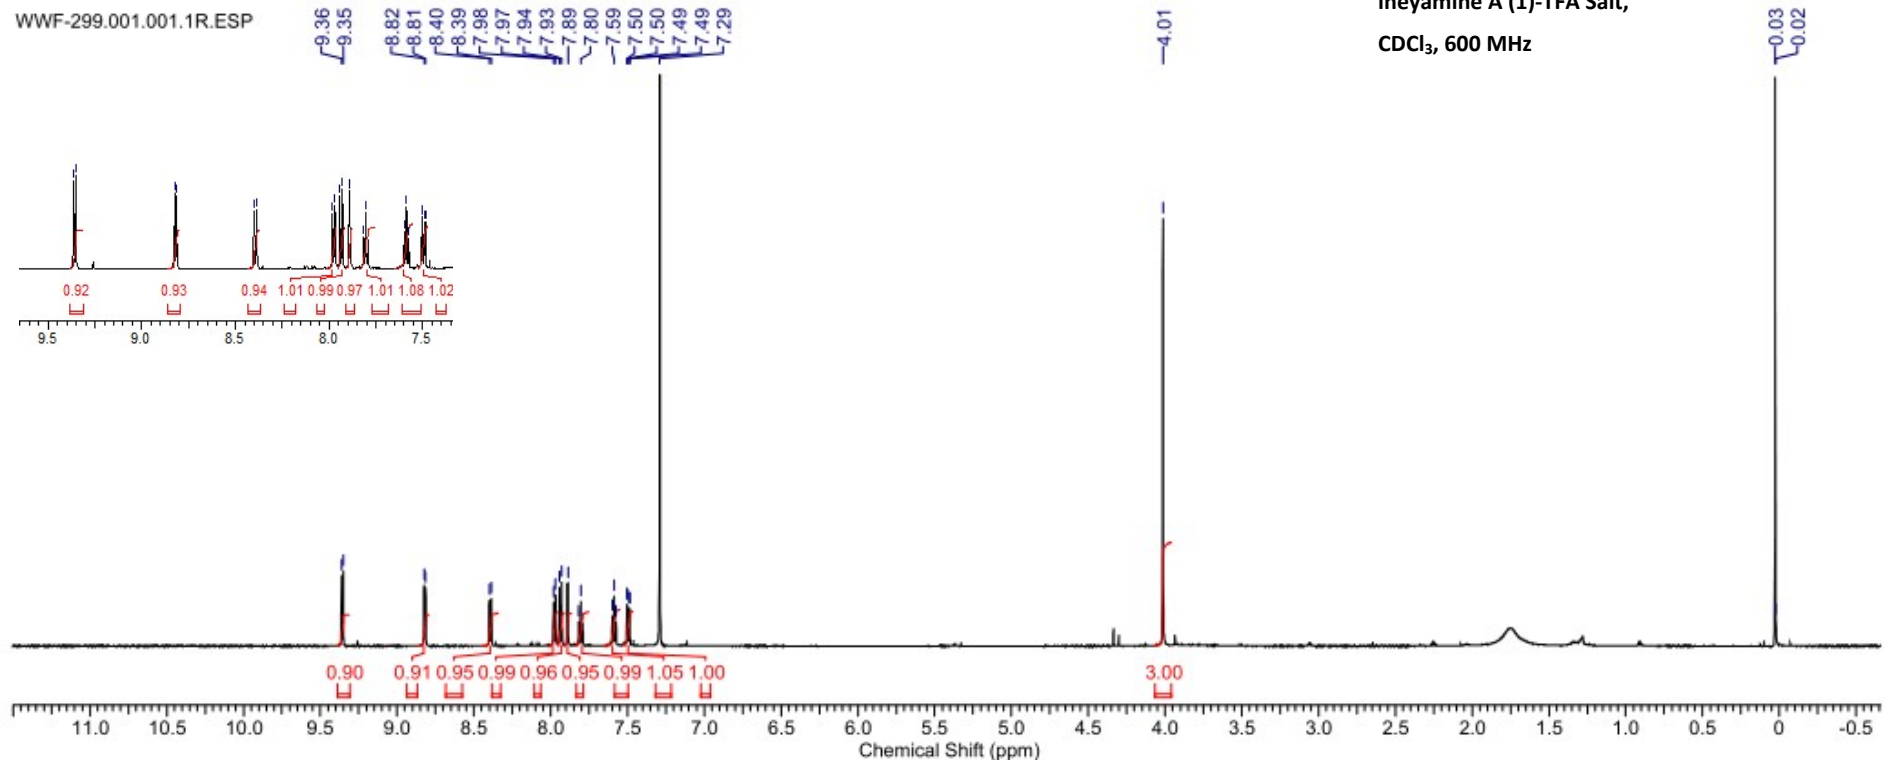

WWF-299.002.001.1R.ESP

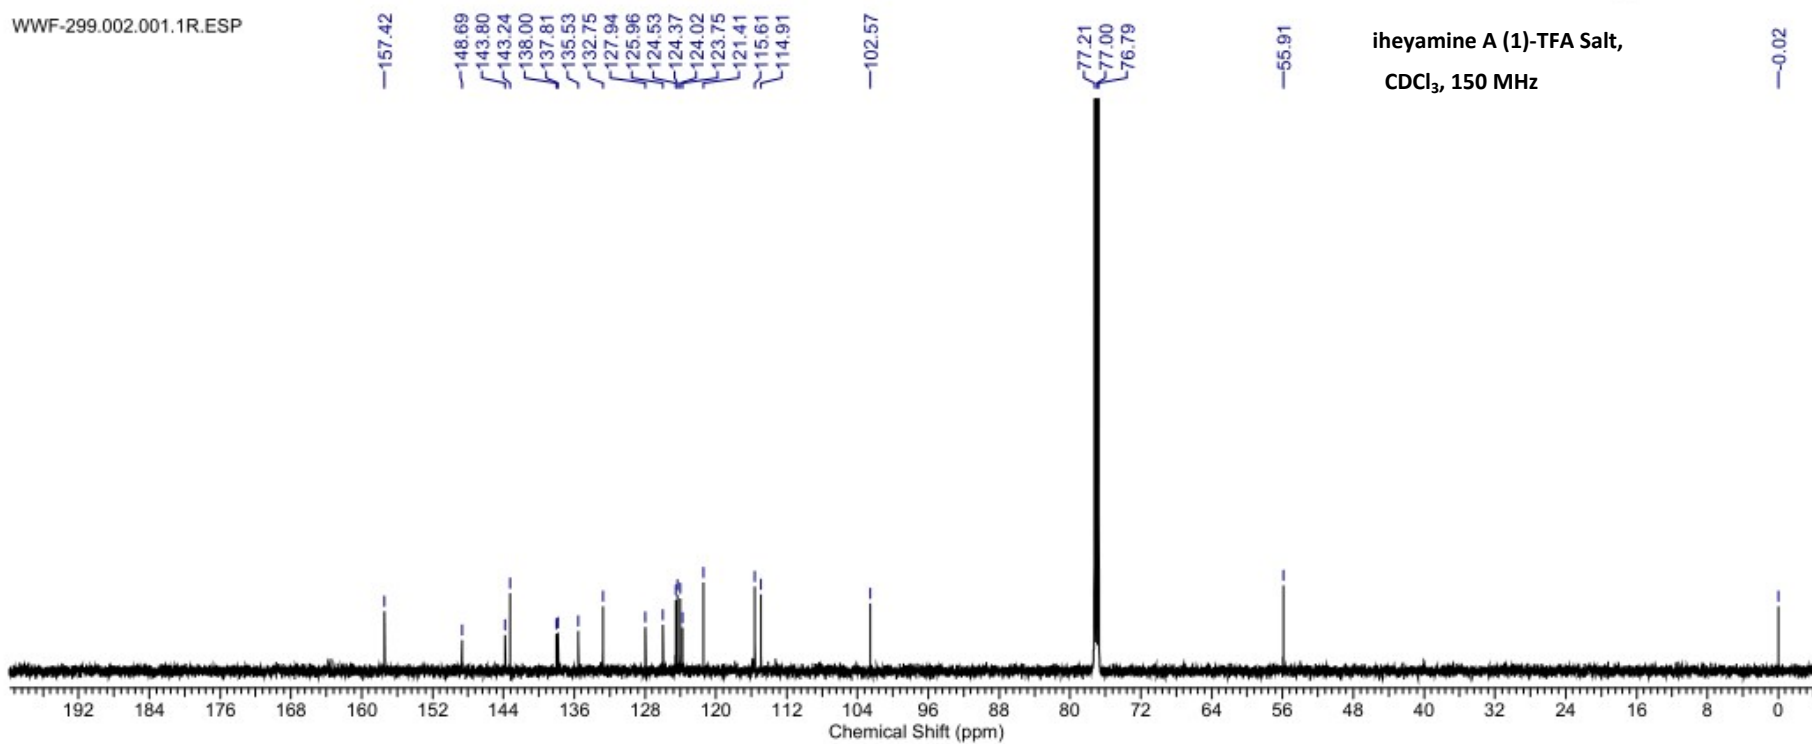

WWF-22299 #27 RT: 0.12 AV: 1 NL: 1.00E9  
T: FTMS + p ESI Full ms [100.0000-1500.0000]

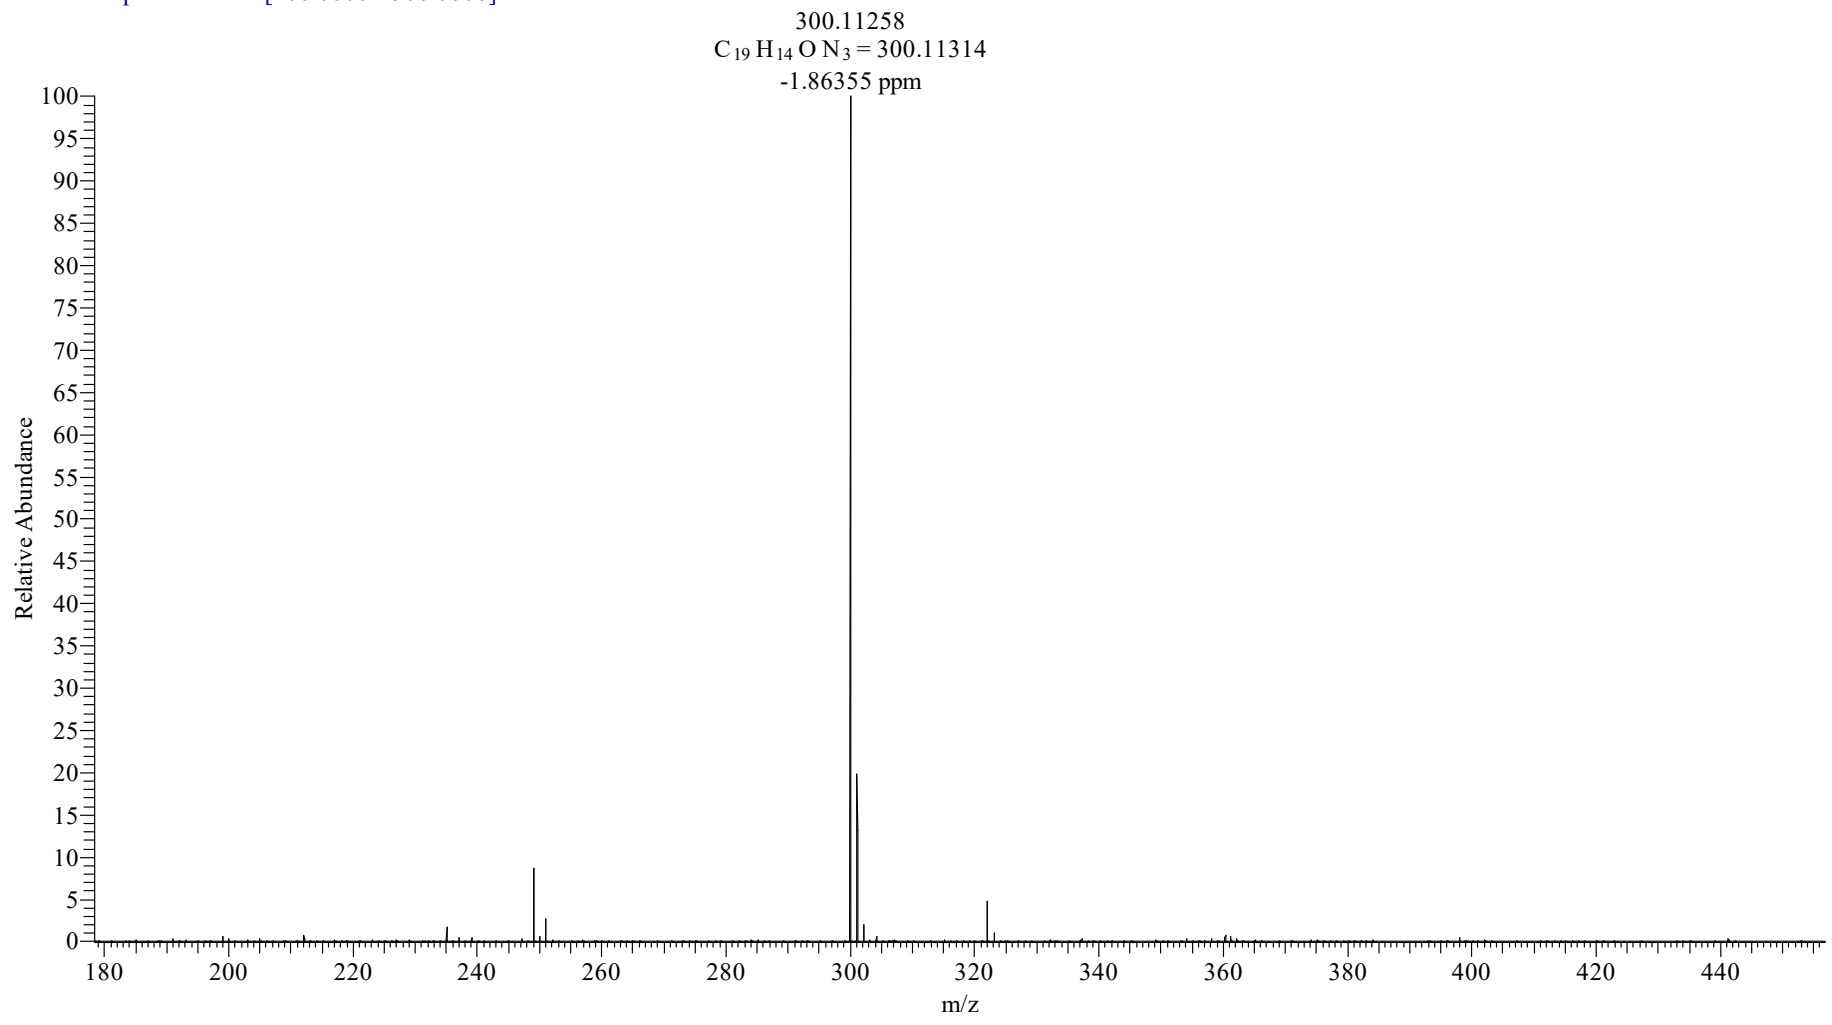

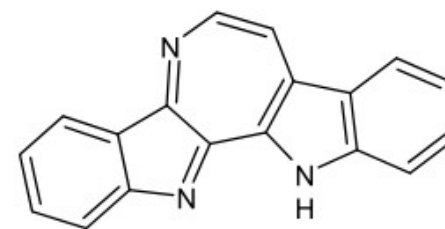

1a, CDCl<sub>3</sub>, 600 MHz

WWF-269.001.001.1R.ESP

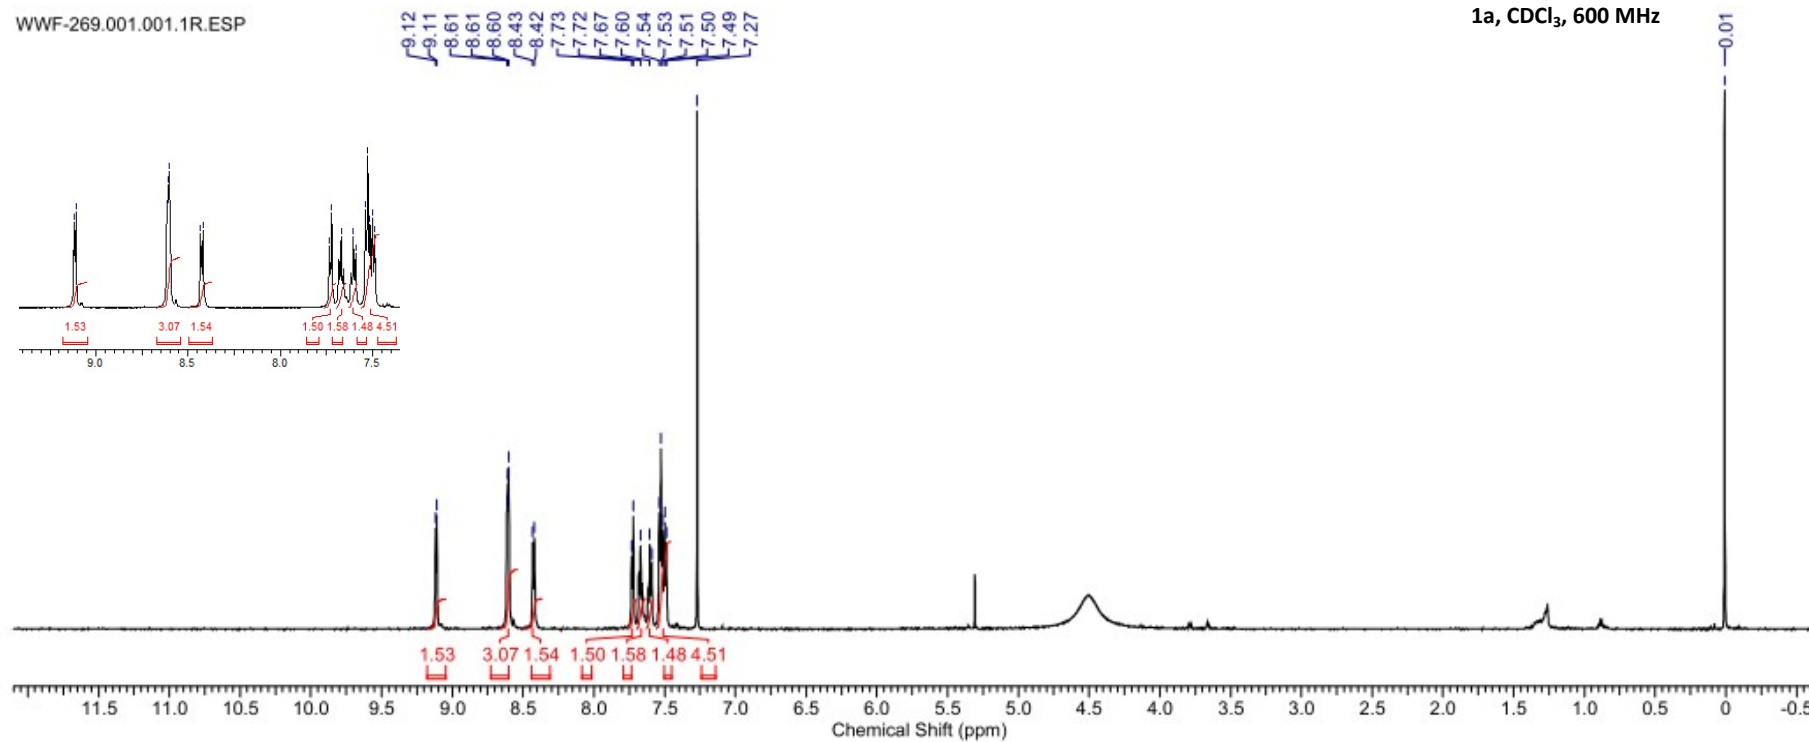



WWF-269.002.001.1R (2).ESP

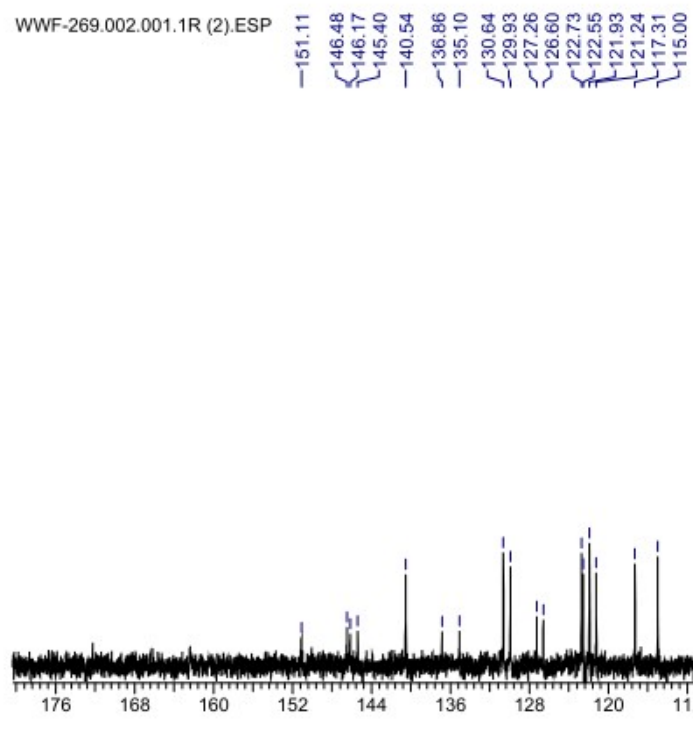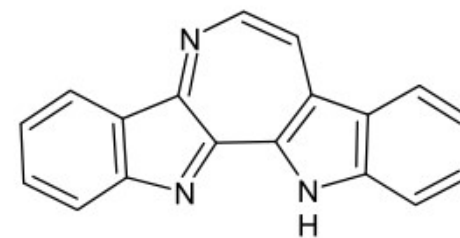

1a, CDCl<sub>3</sub>, 150 MHz

-0.02

WWF-21269 #23 RT: 0.10 AV: 1 NL: 8.46E8  
T: FTMS + p ESI Full ms [100.0000-1500.0000]

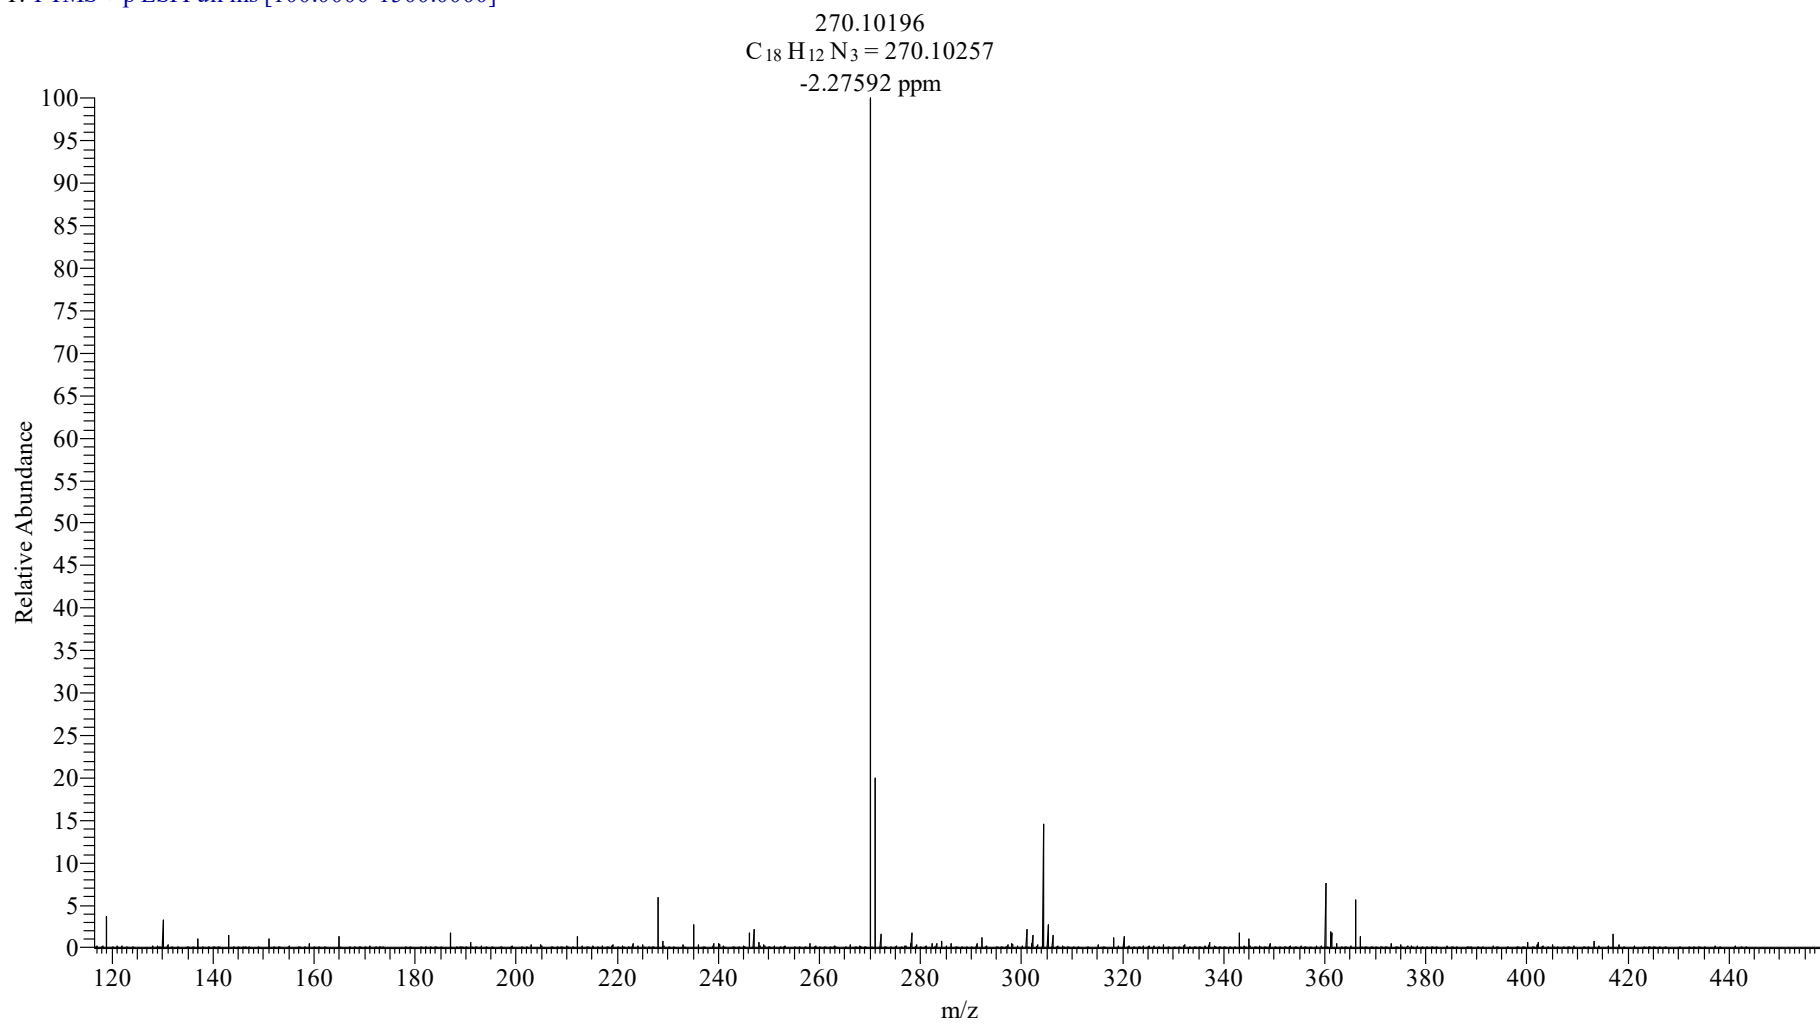

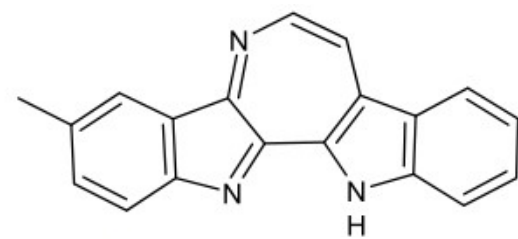

1b, CDCl<sub>3</sub>+CF<sub>3</sub>COOD, 600 MHz

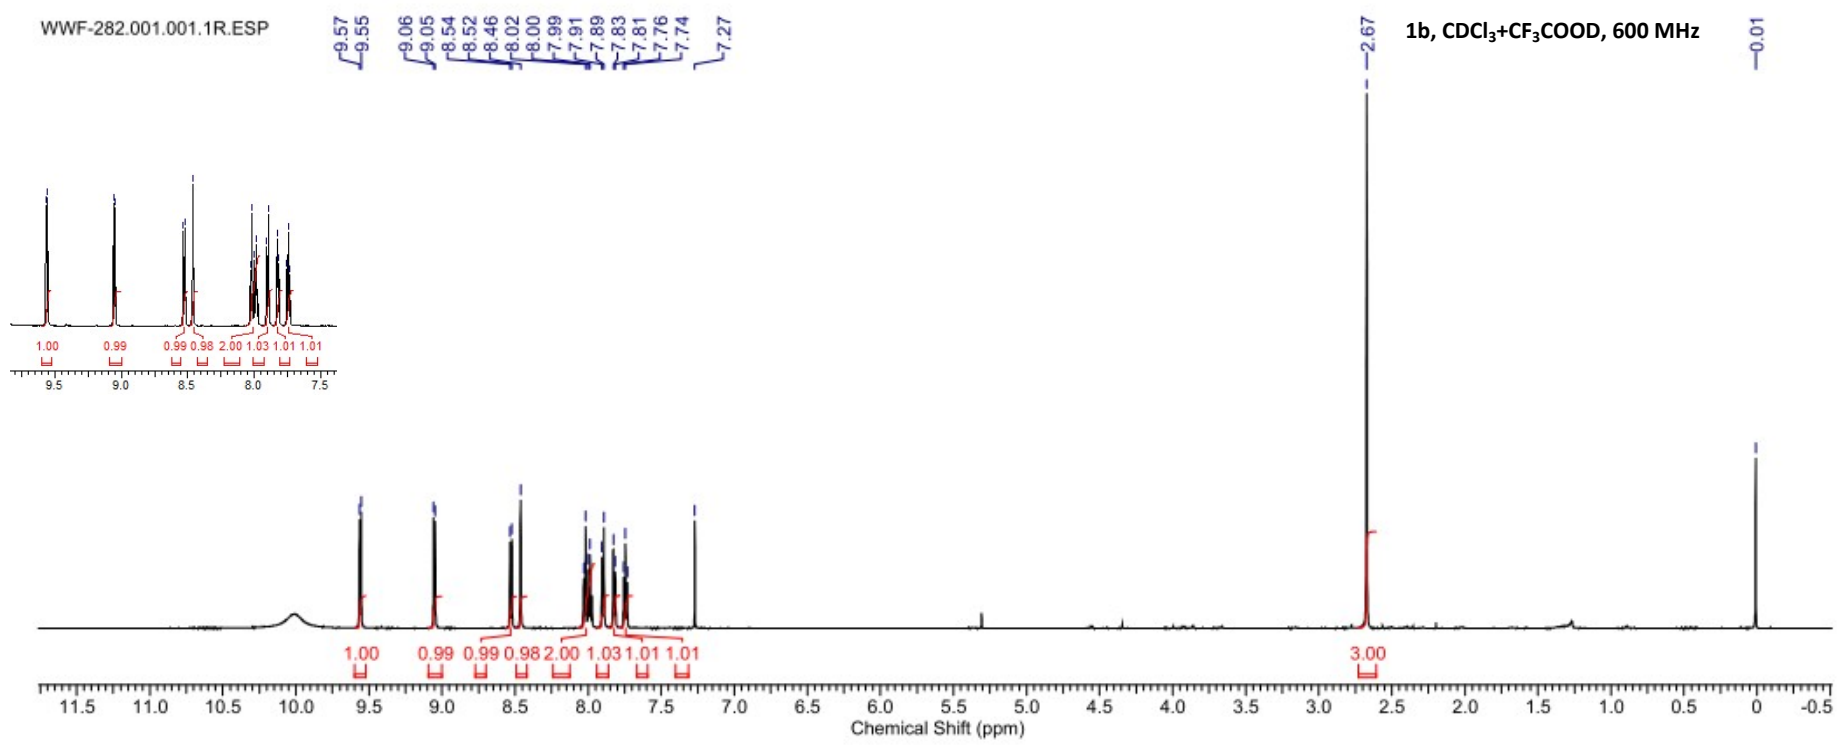

WWF-282.002.001.1R.ESP

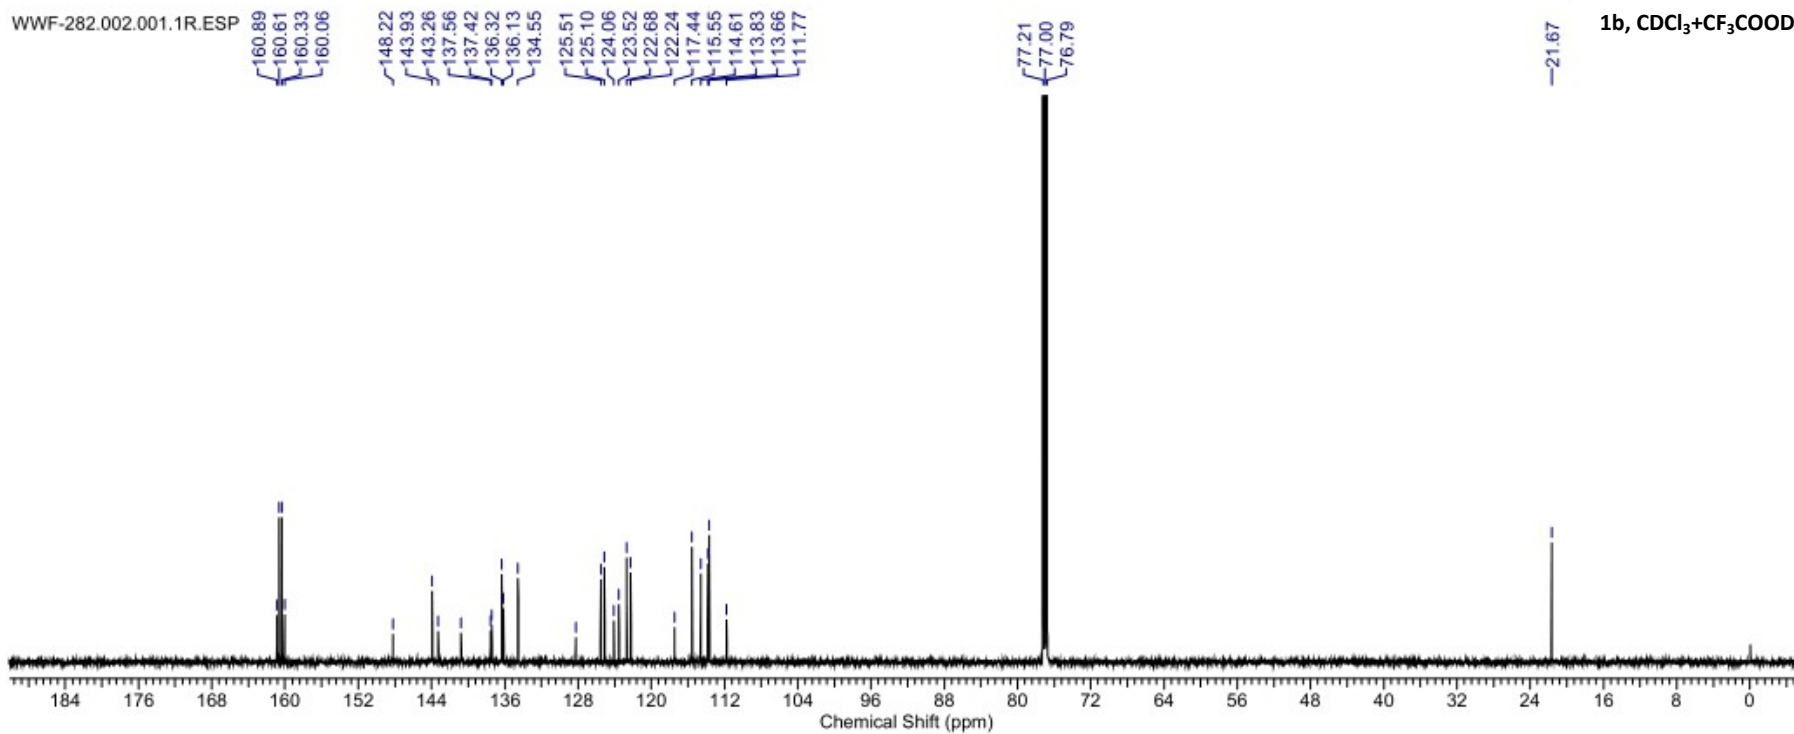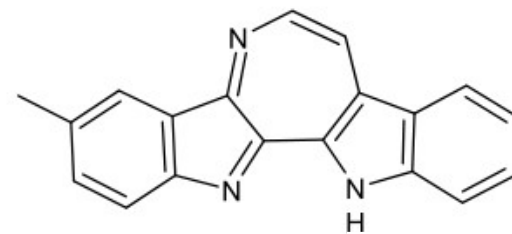

1b, CDCl<sub>3</sub>+CF<sub>3</sub>COOD, 150 MHz

WWF-22283 #27 RT: 0.12 AV: 1 NL: 3.10E9  
T: FTMS + p ESI Full ms [100.0000-1500.0000]

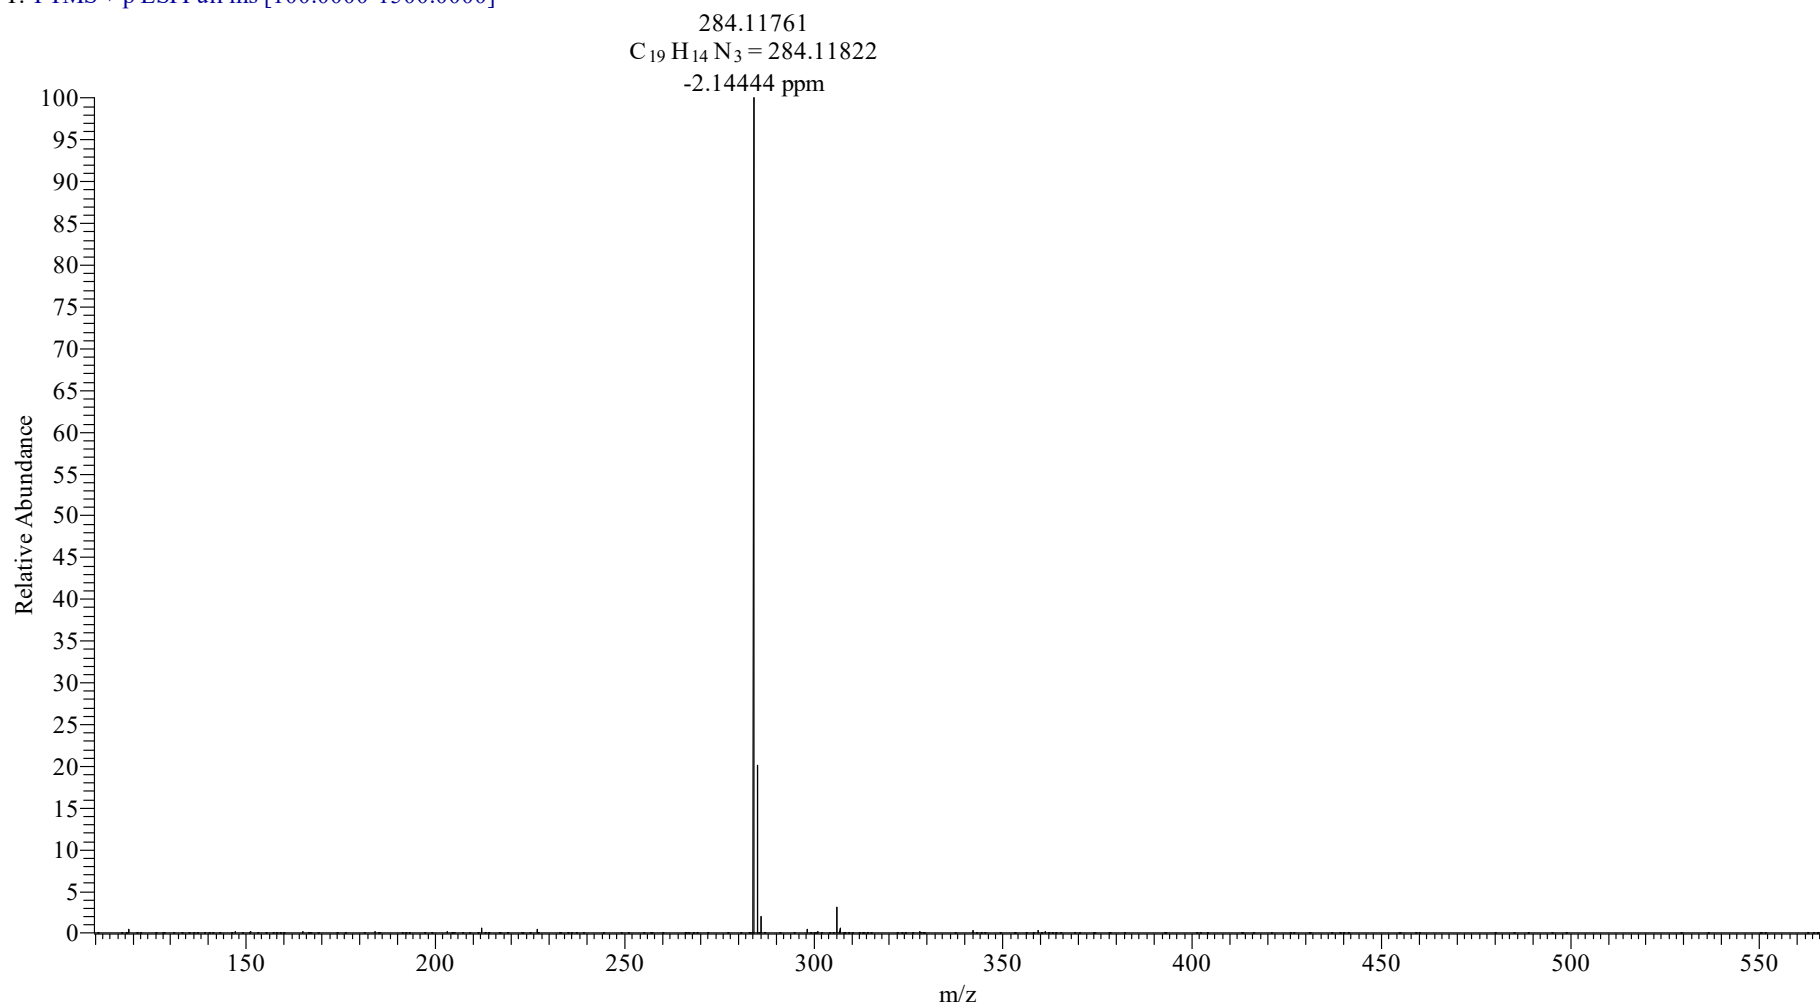

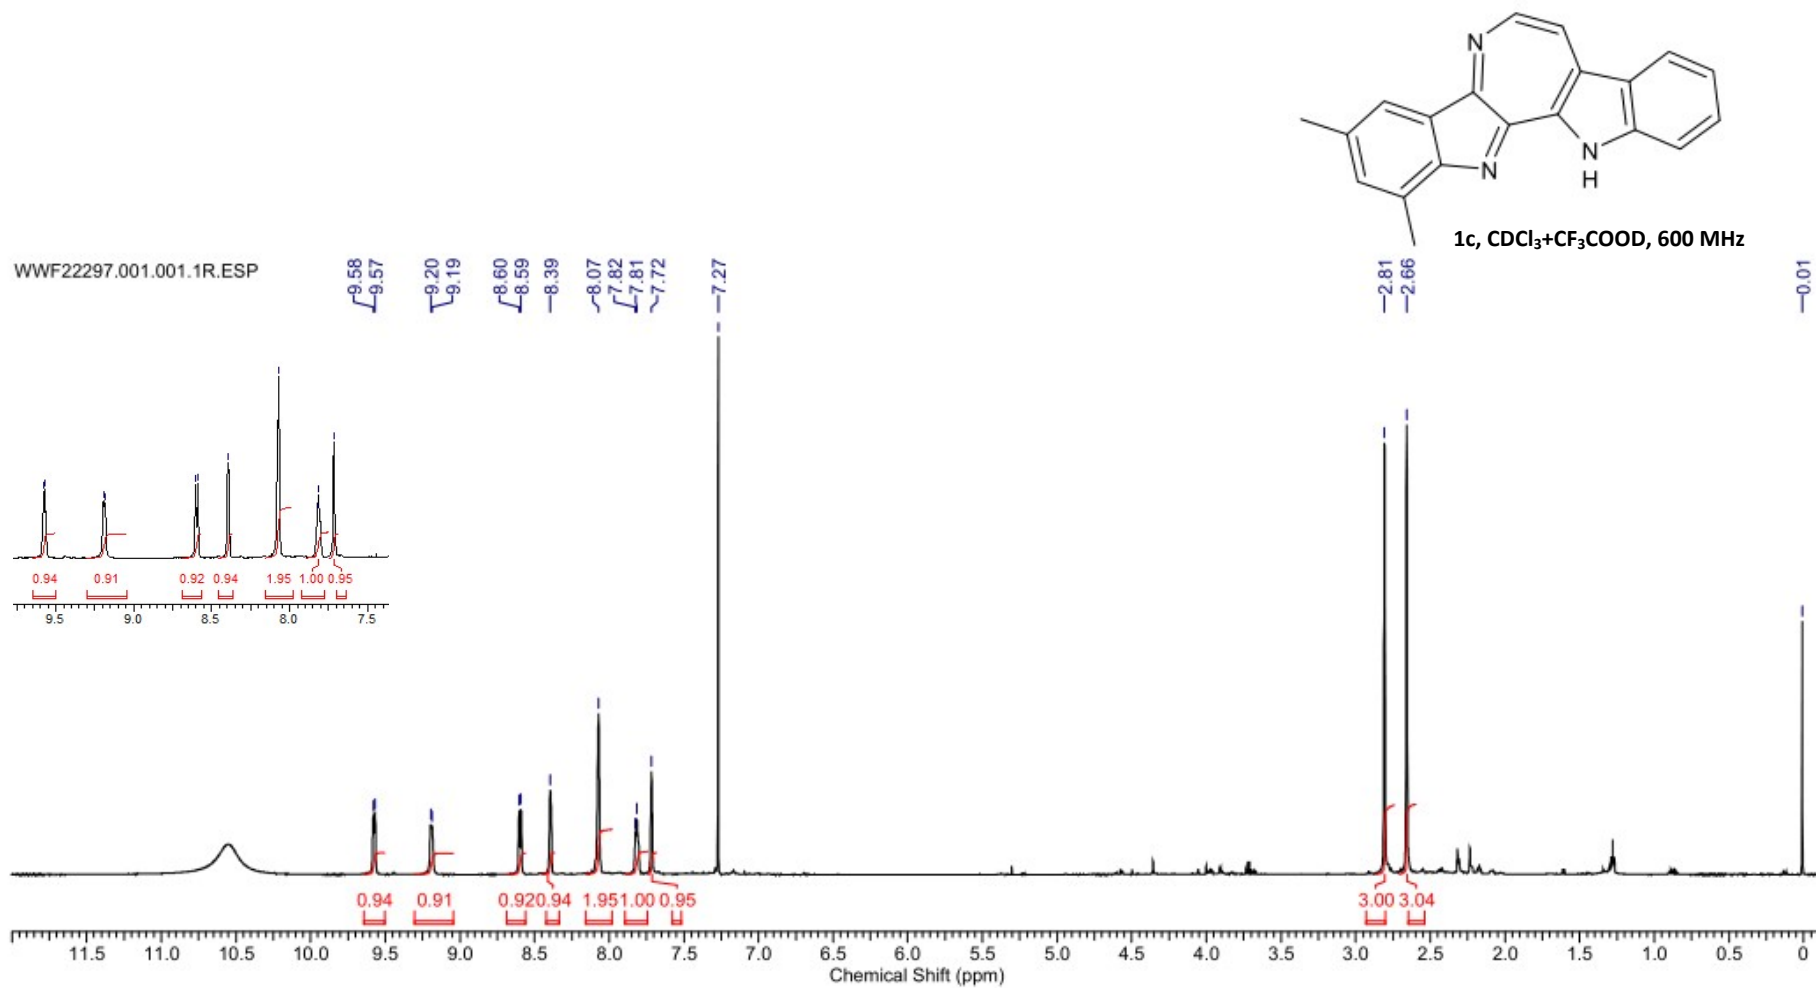

WWF22297.002.001.1R.ESP

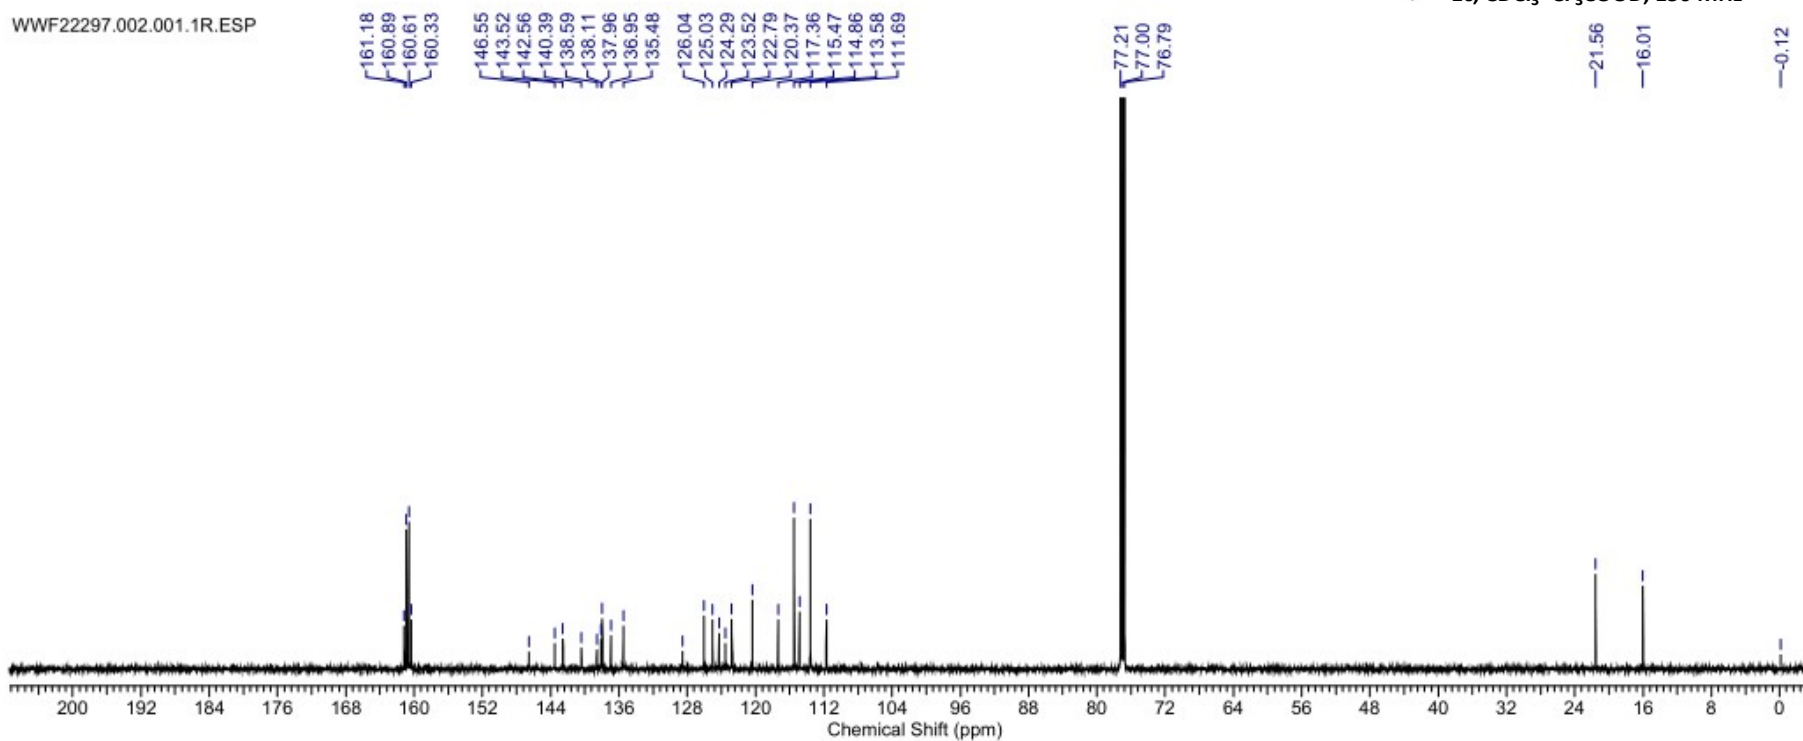

WWF-22297 #23 RT: 0.10 AV: 1 NL: 1.97E9  
T: FTMS + p ESI Full ms [100.0000-1500.0000]

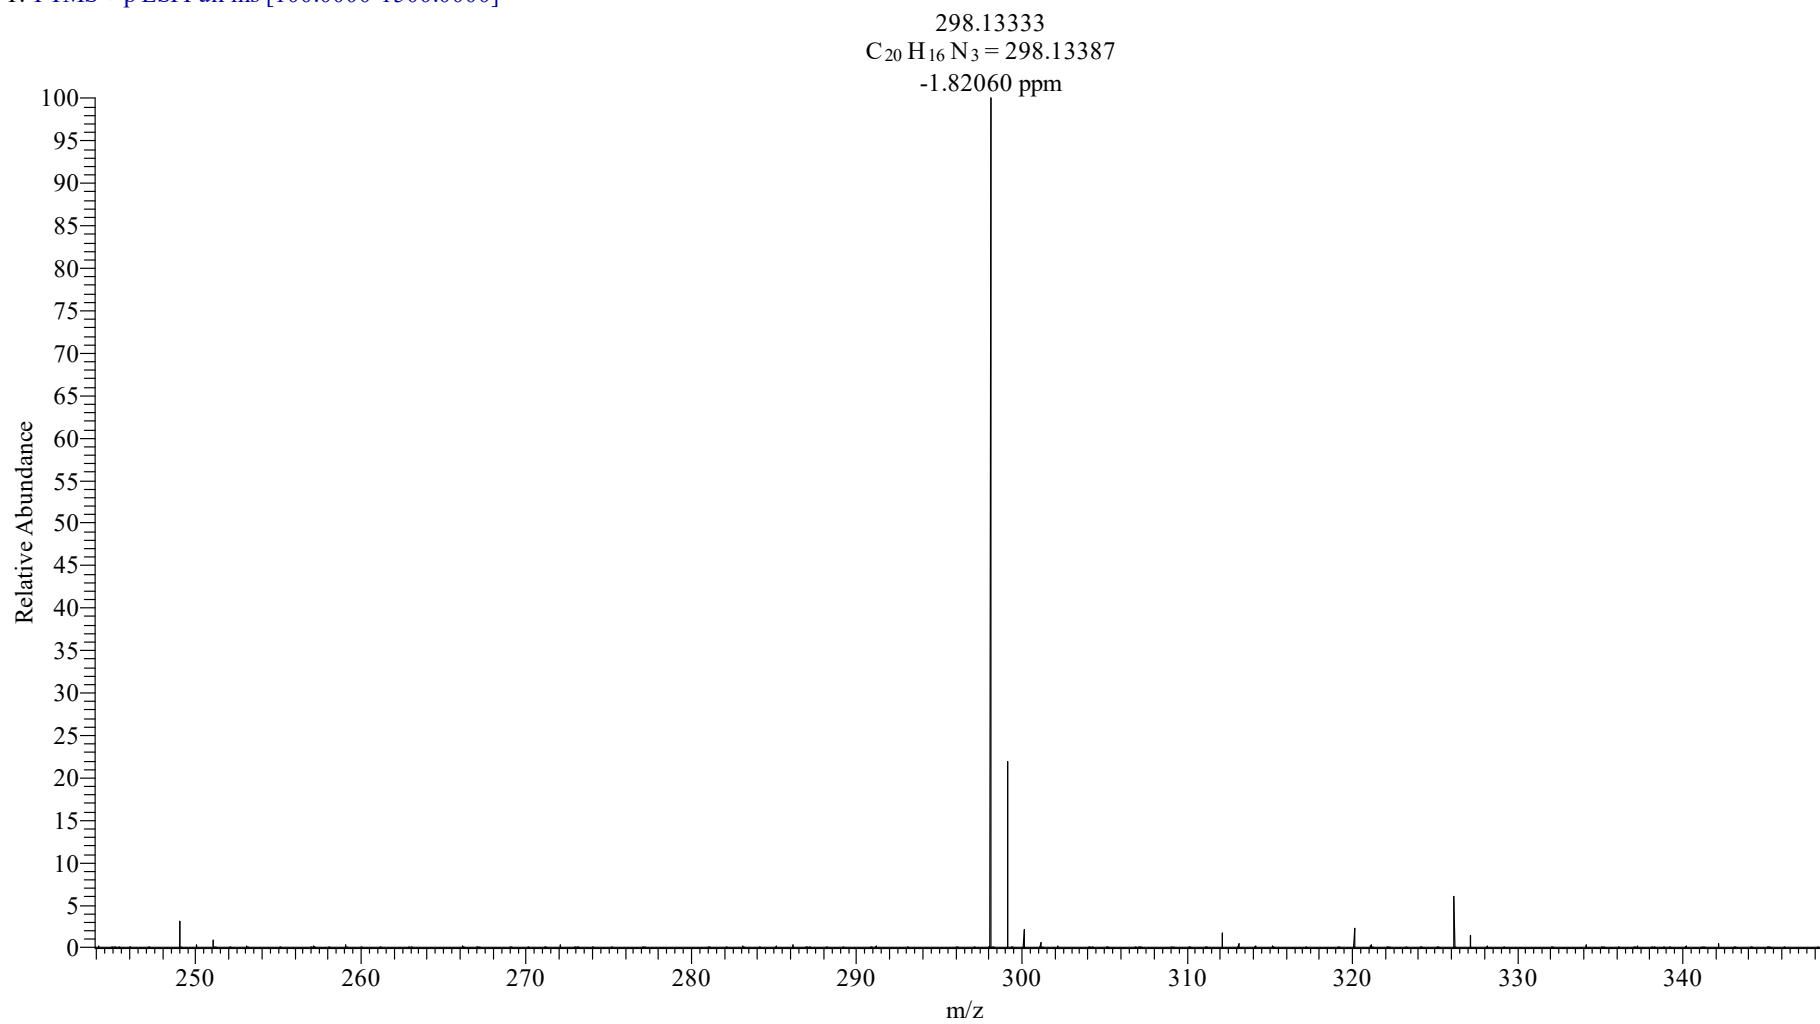



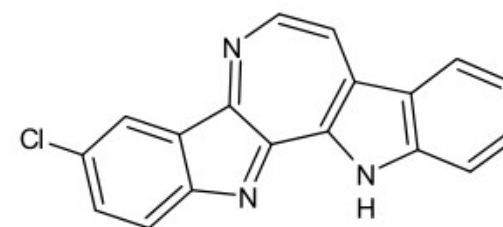

1d, CDCl<sub>3</sub>+CF<sub>3</sub>COOD, 600 MHz

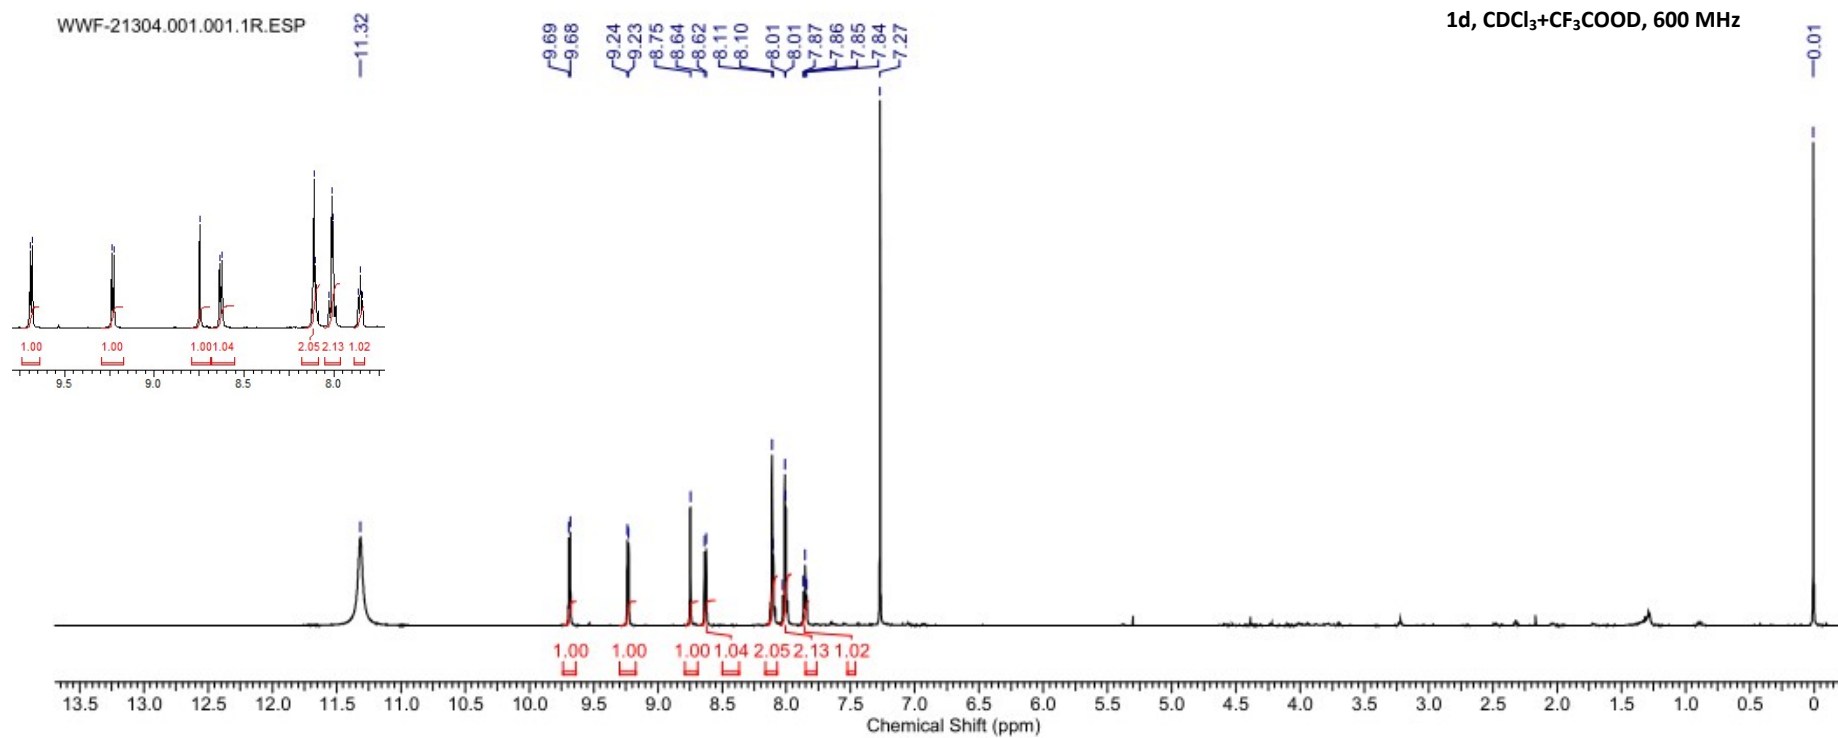

WWF-21304.002.001.1R.ESP

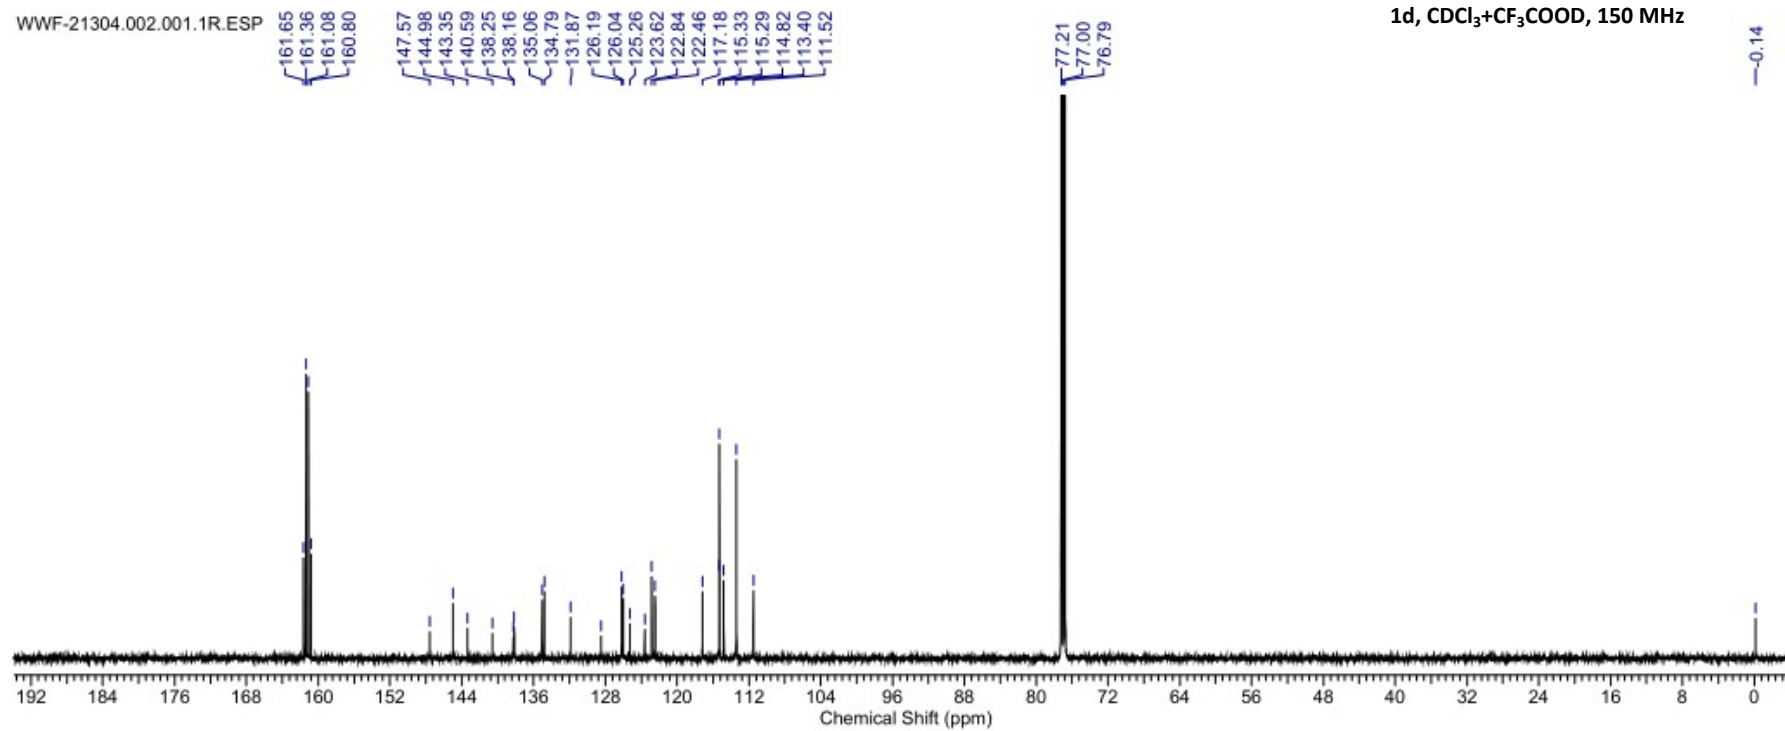

WWF-21304 #24 RT: 0.10 AV: 1 NL: 1.69E9  
T: FTMS + p ESI Full ms [100.0000-1500.0000]

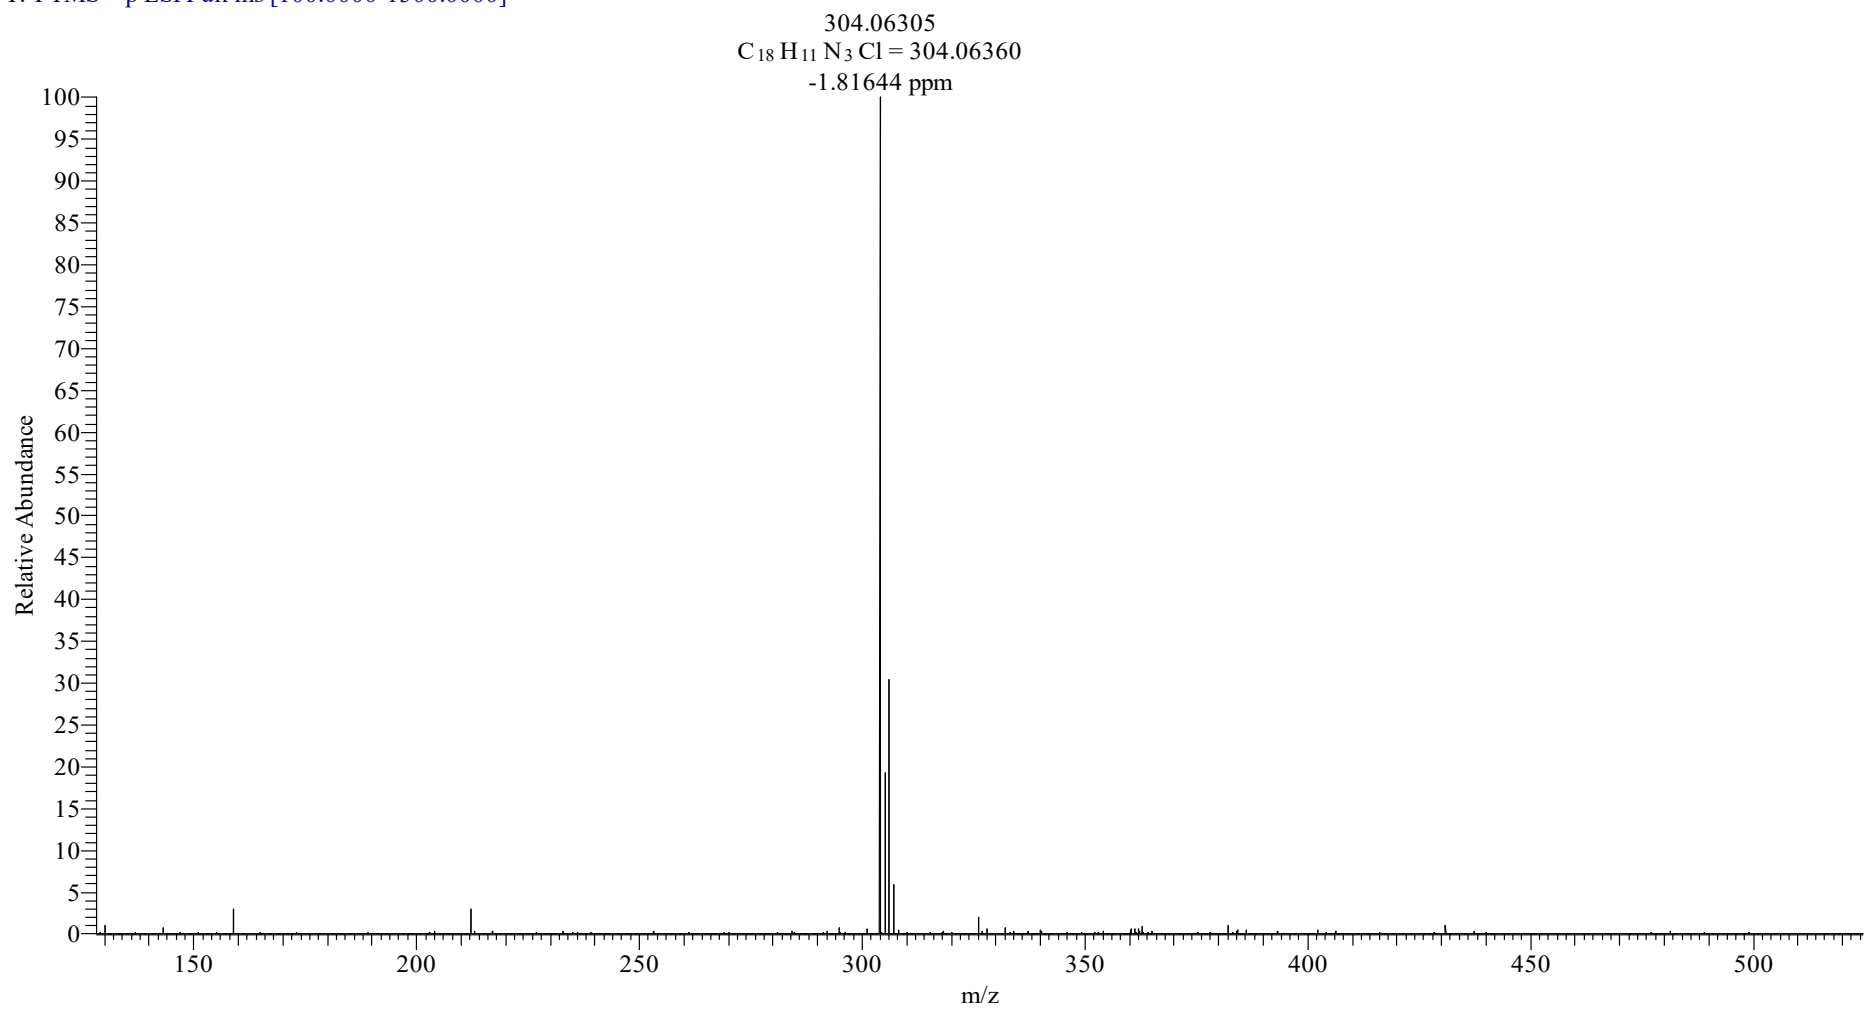

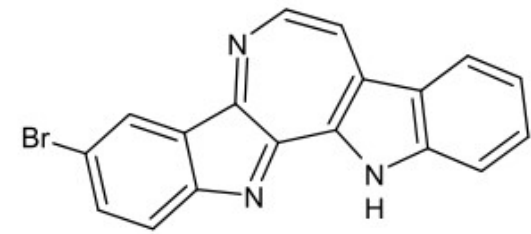

1e, CDCl<sub>3</sub>+CF<sub>3</sub>COOD, 600 MHz

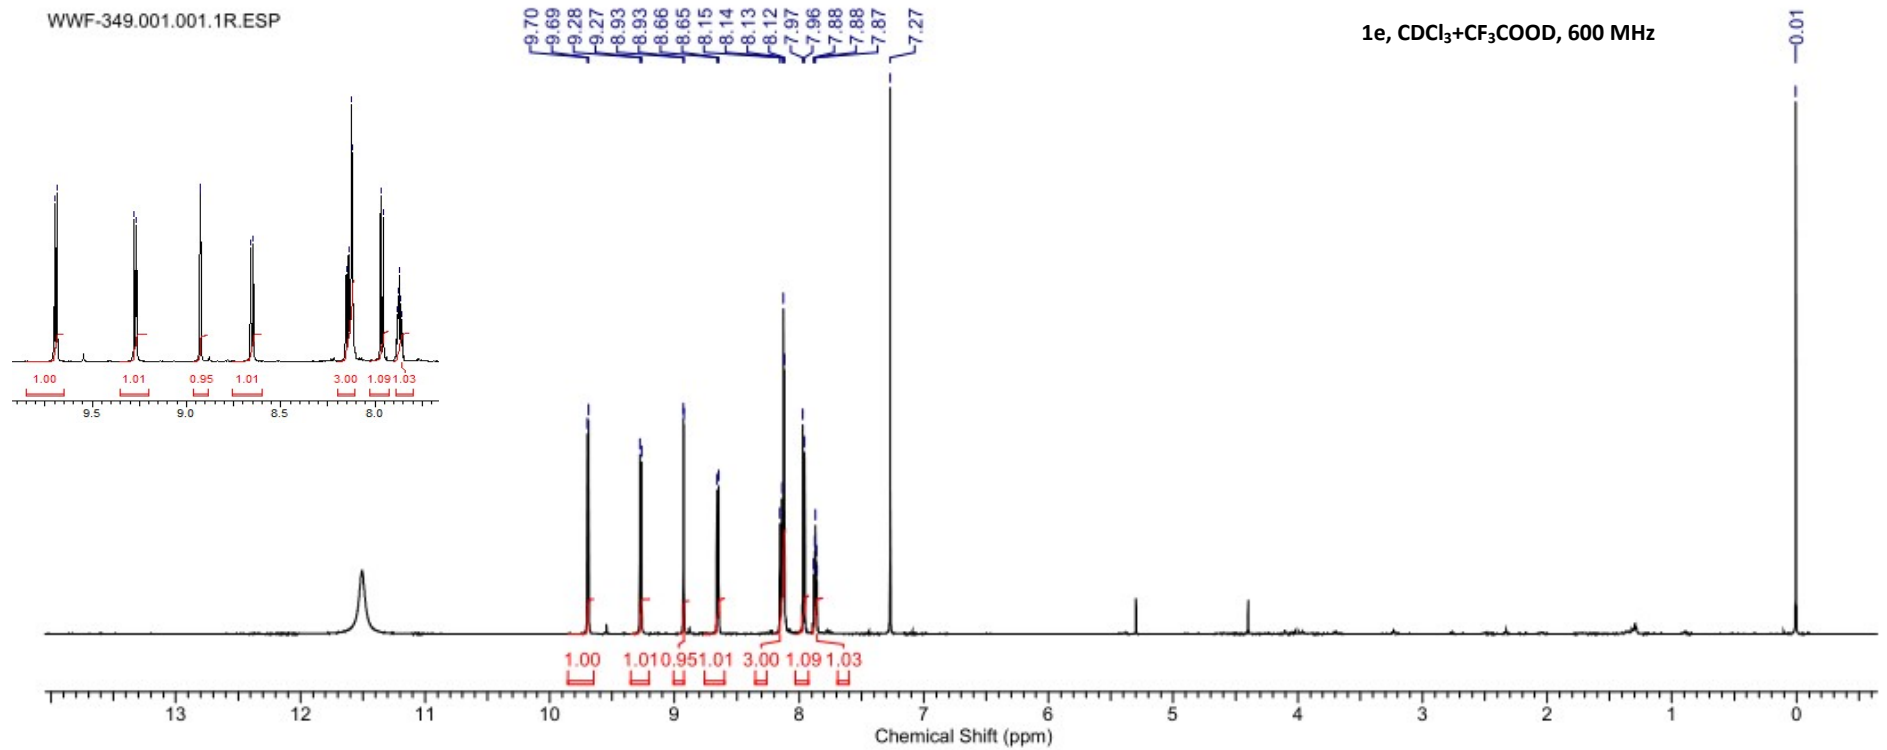

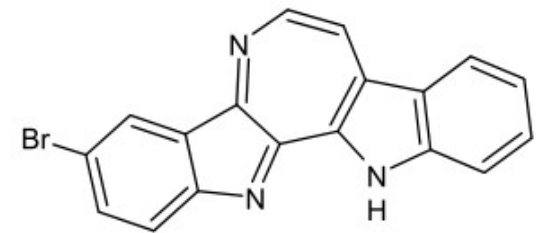

1e, CDCl<sub>3</sub>+CF<sub>3</sub>COOD, 150 MHz

—0.32

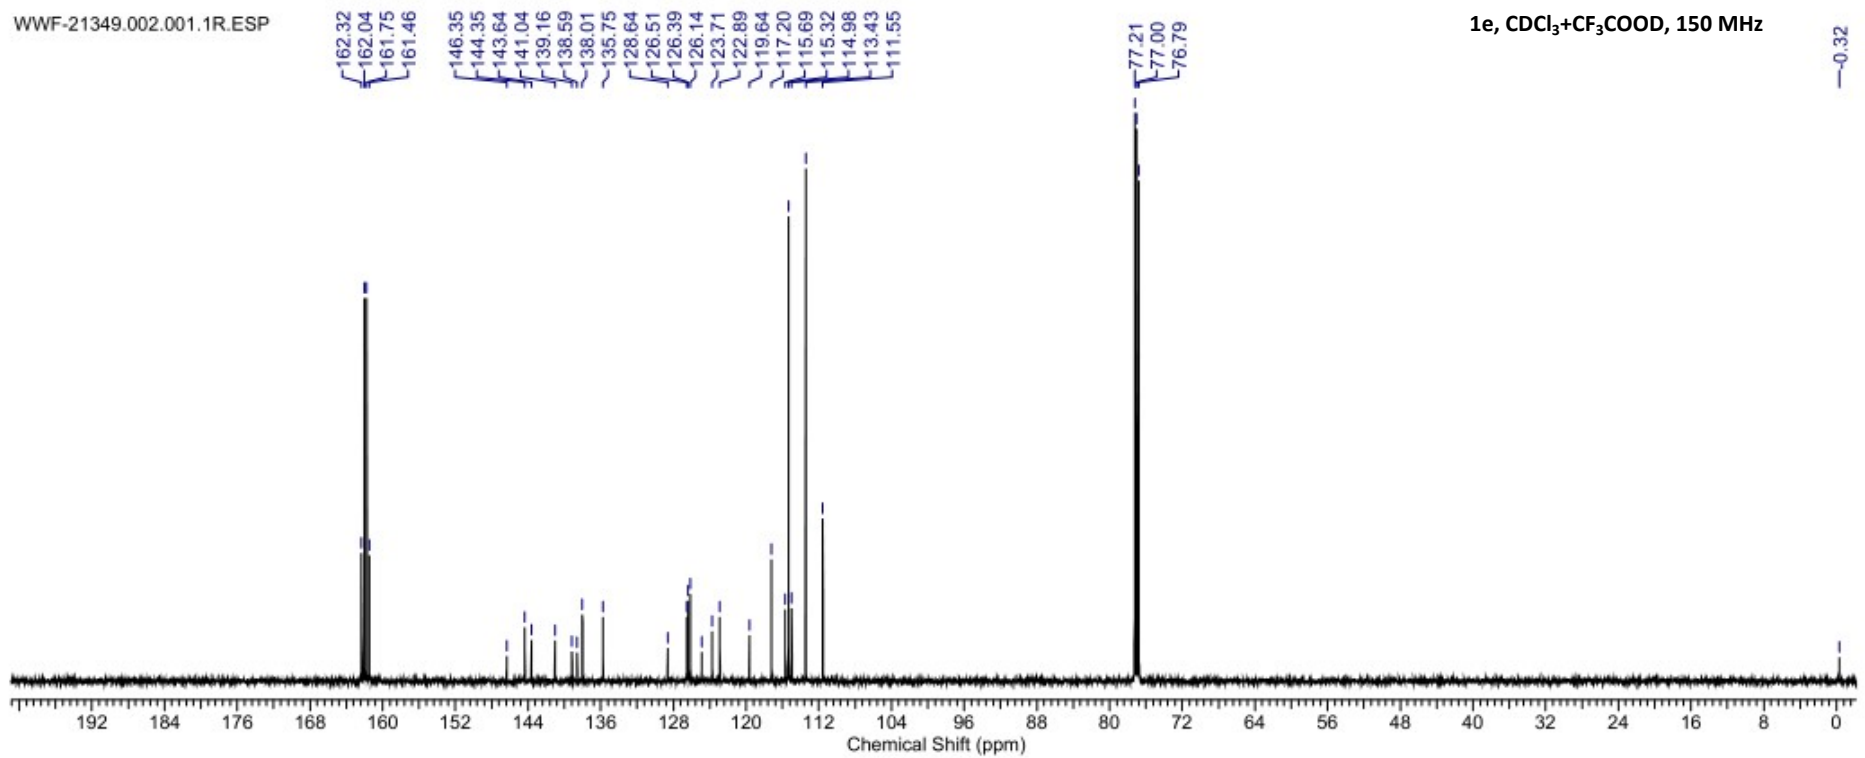

WWF-21349-5 #24 RT: 0.10 AV: 1 NL: 3.98E8  
T: FTMS + p ESI Full ms [100.0000-1500.0000]

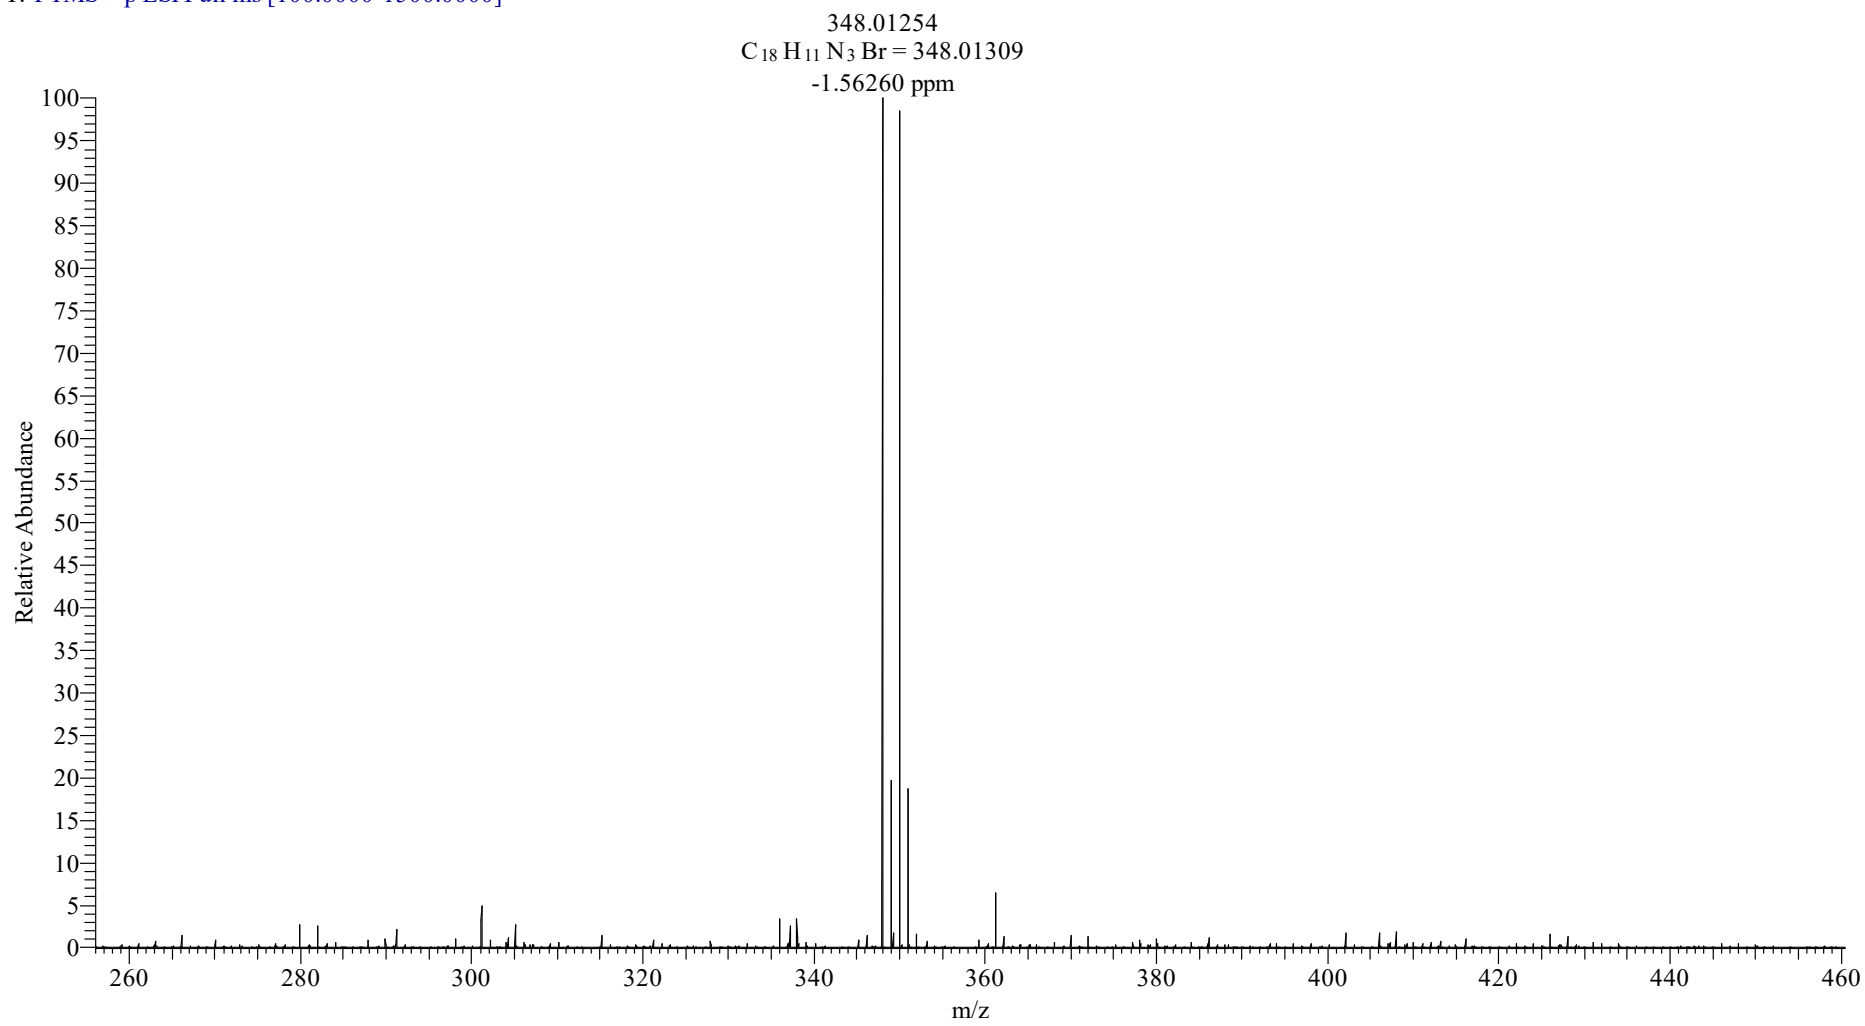

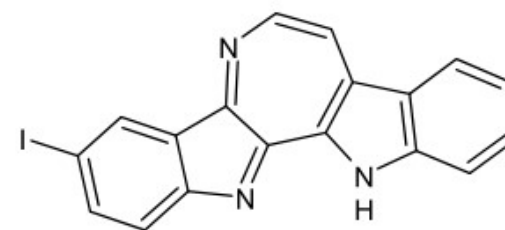

1f, CDCl<sub>3</sub>+CF<sub>3</sub>COOD, 600 MHz

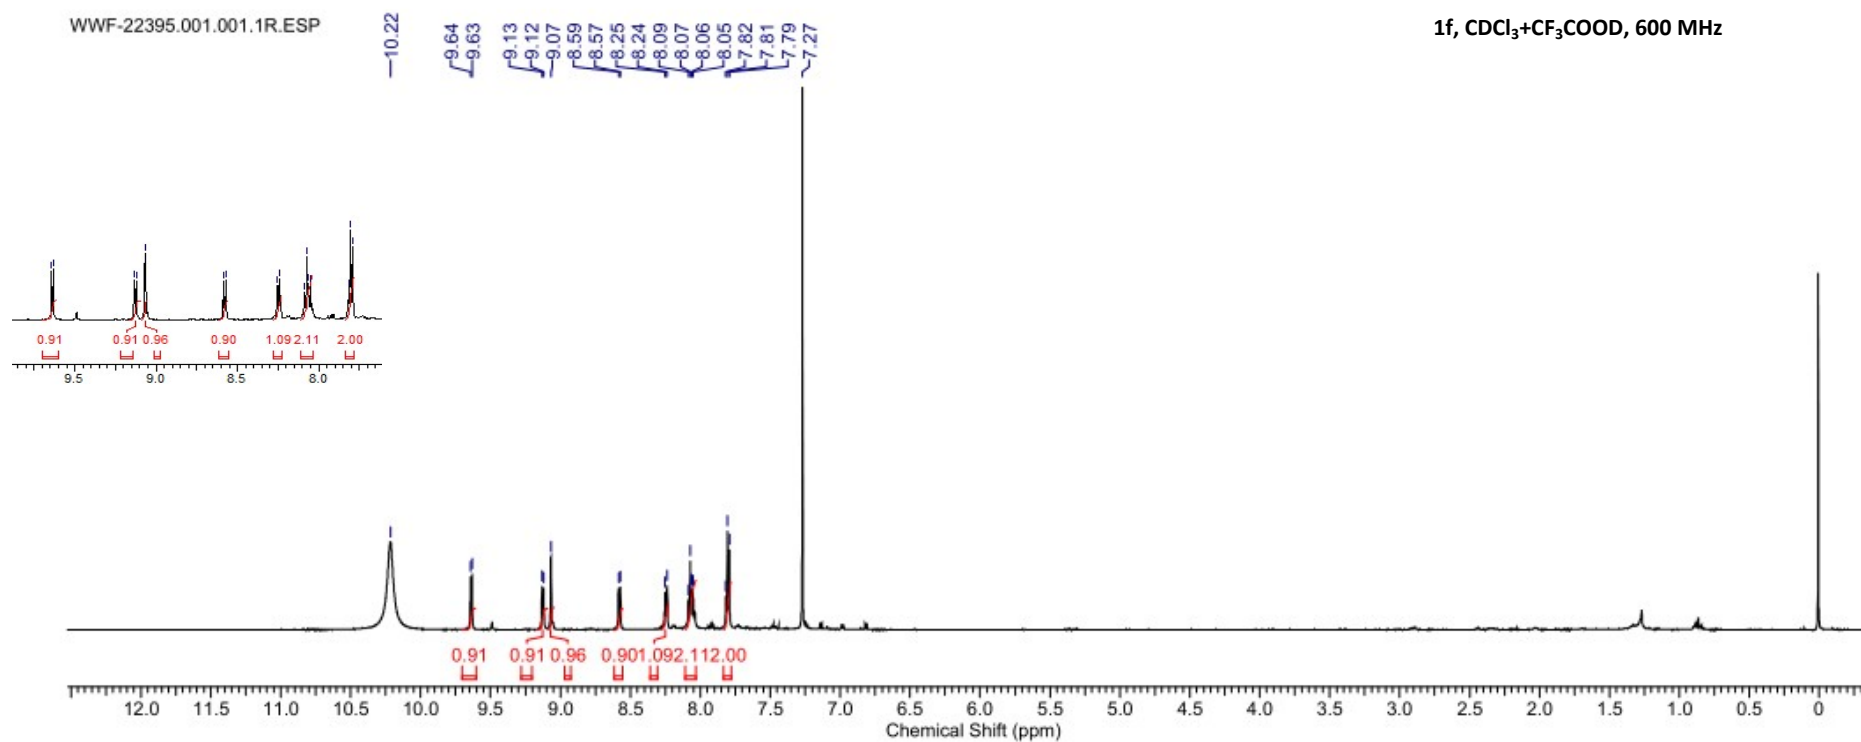

2.001.001.1R.ESP

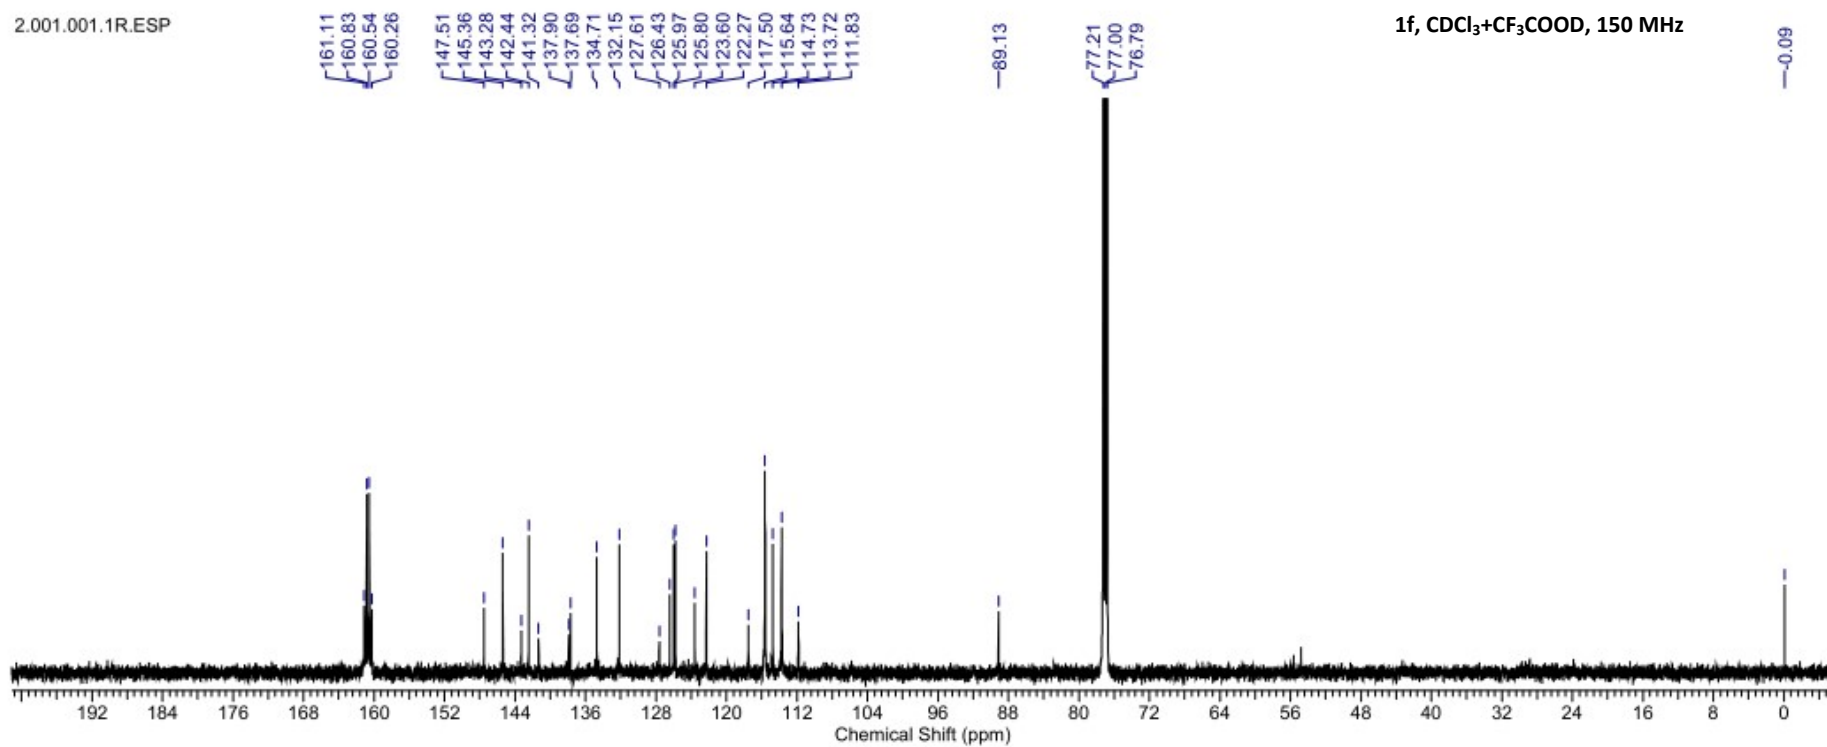



WWF-22395 #22 RT: 0.10 AV: 1 NL: 6.32E8  
T: FTMS + p ESI Full ms [100.0000-1500.0000]

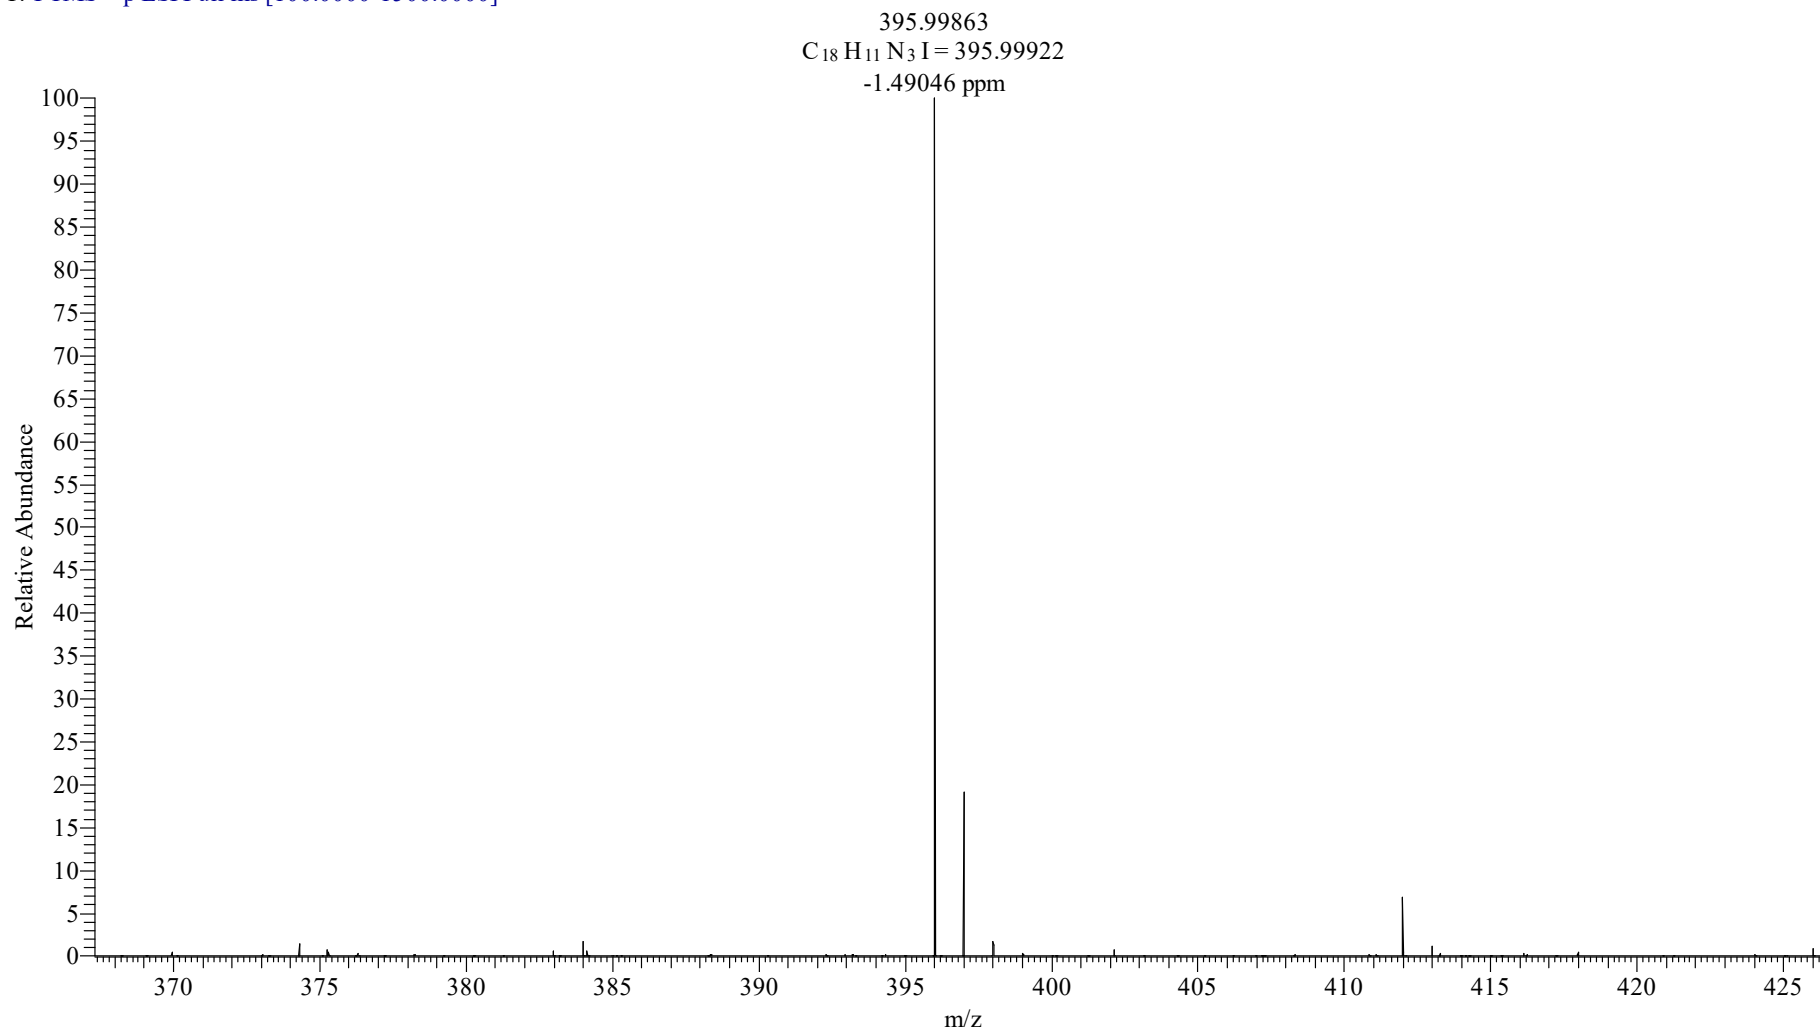

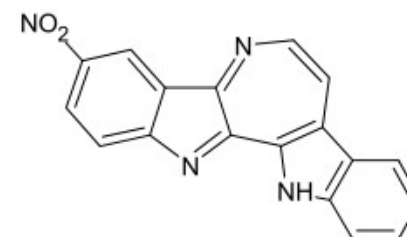

1g, CDCl<sub>3</sub>+CF<sub>3</sub>COOD, 600 MHz

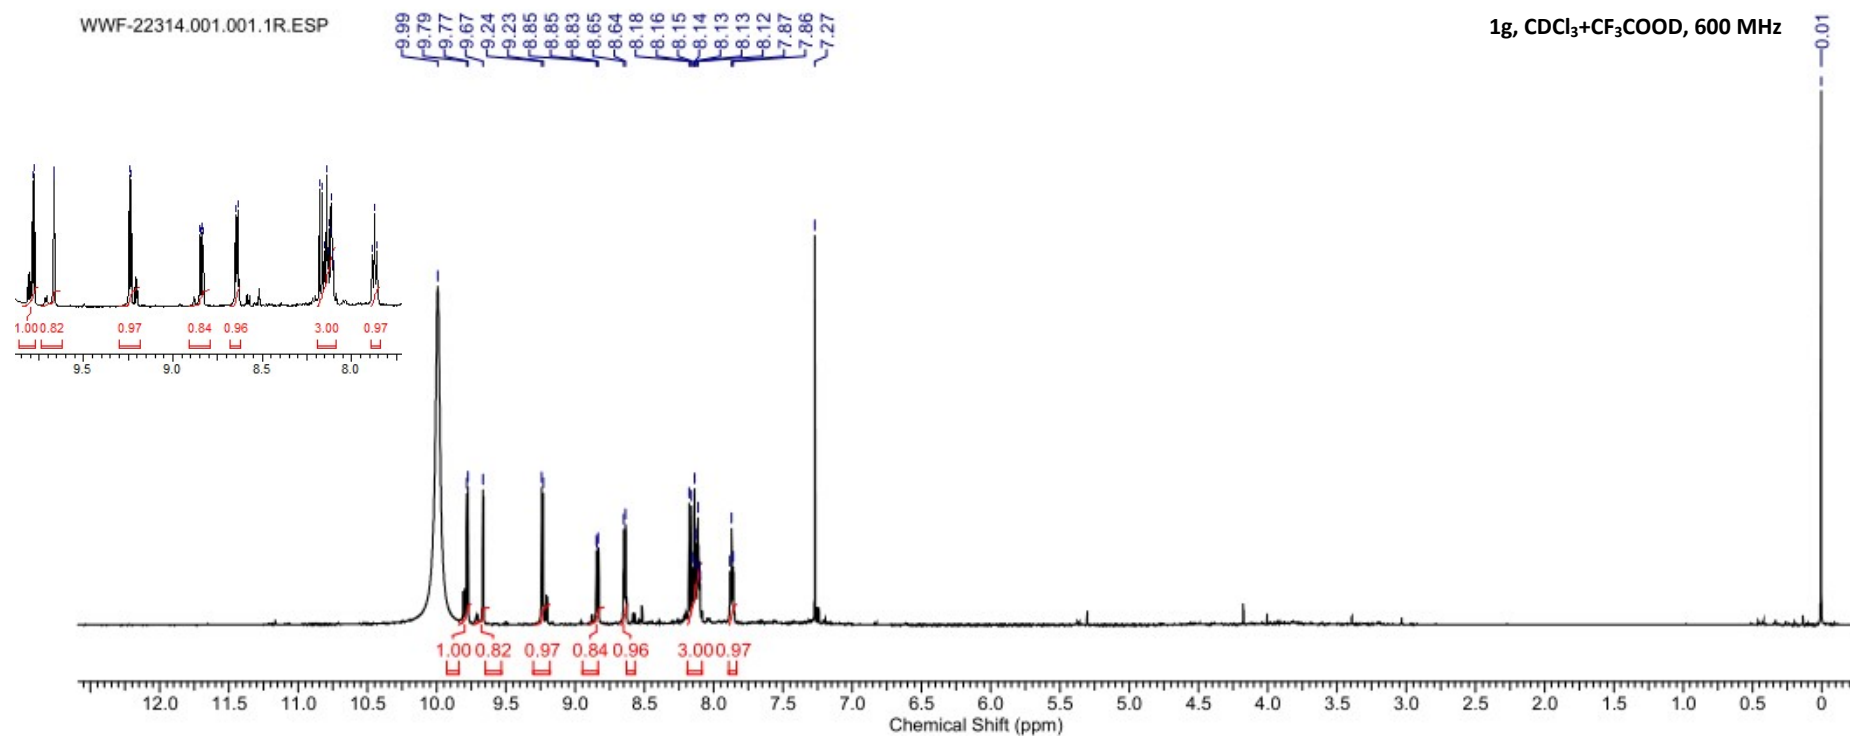

WWF-22314-0325.002.001.1r.esp

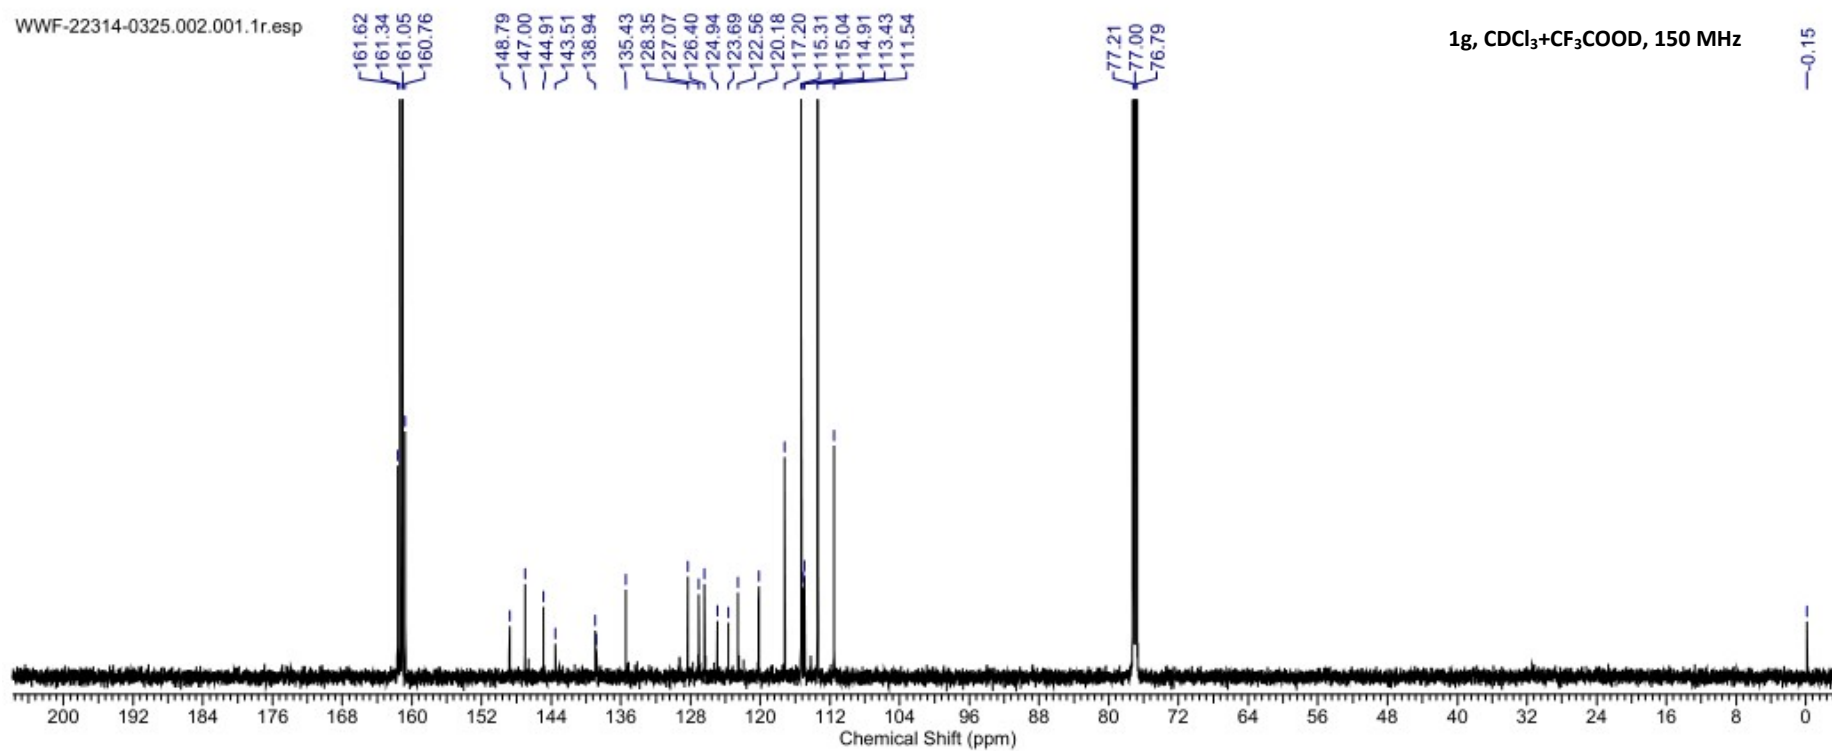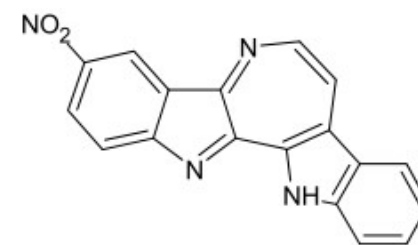

1g, CDCl<sub>3</sub>+CF<sub>3</sub>COOD, 150 MHz

-0.15

WWF-22314 #31 RT: 0.14 AV: 1 NL: 3.17E7  
T: FTMS + p ESI Full ms [100.0000-1500.0000]

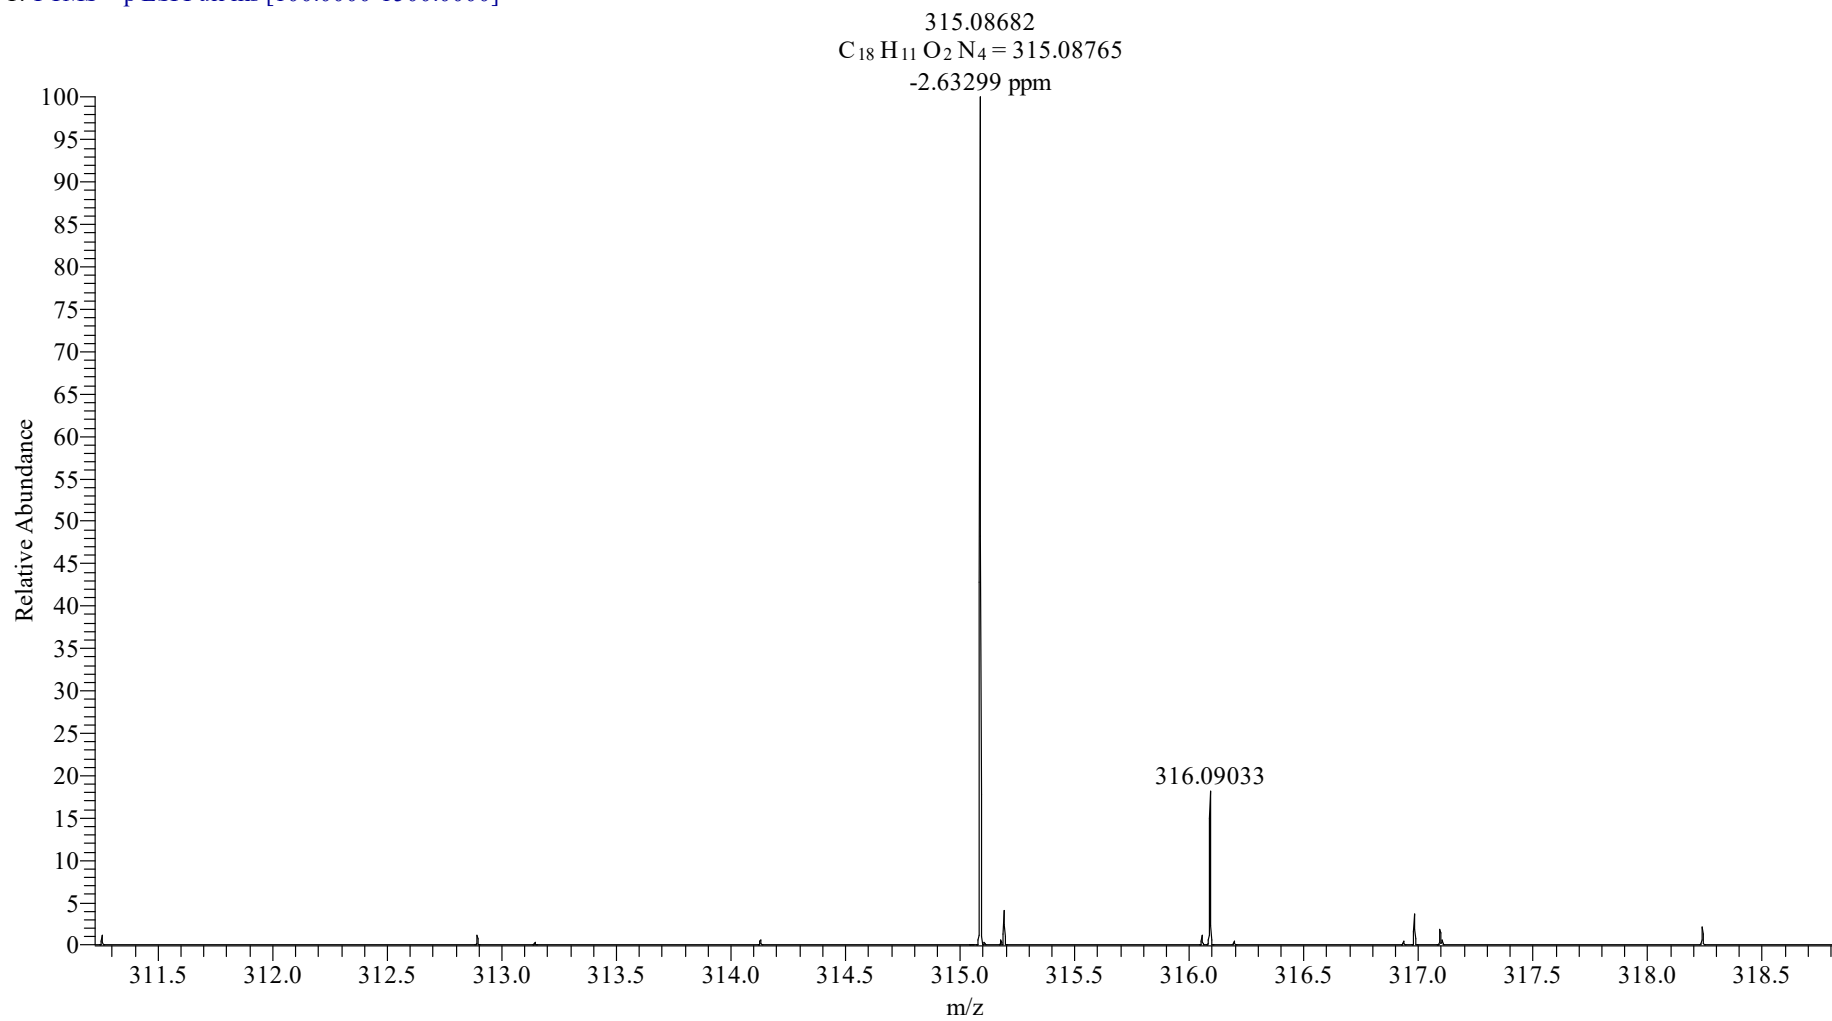

315.08682  
 $C_{18}H_{11}O_2N_4 = 315.08765$   
-2.63299 ppm

XDL-299.001.001.1R.ESP

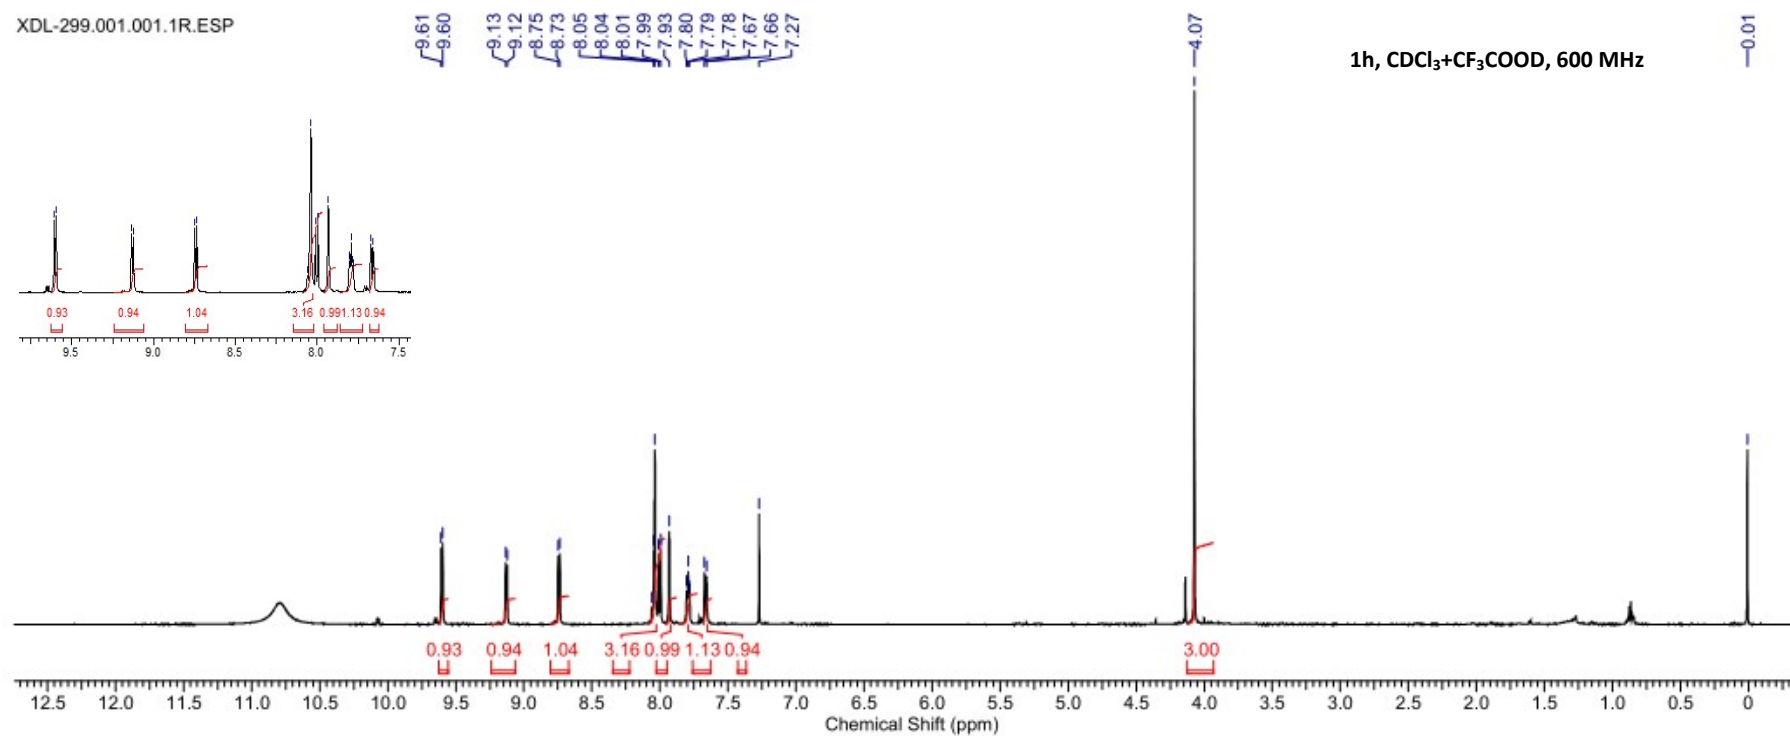

XDL-299.002.001.1R.ESP

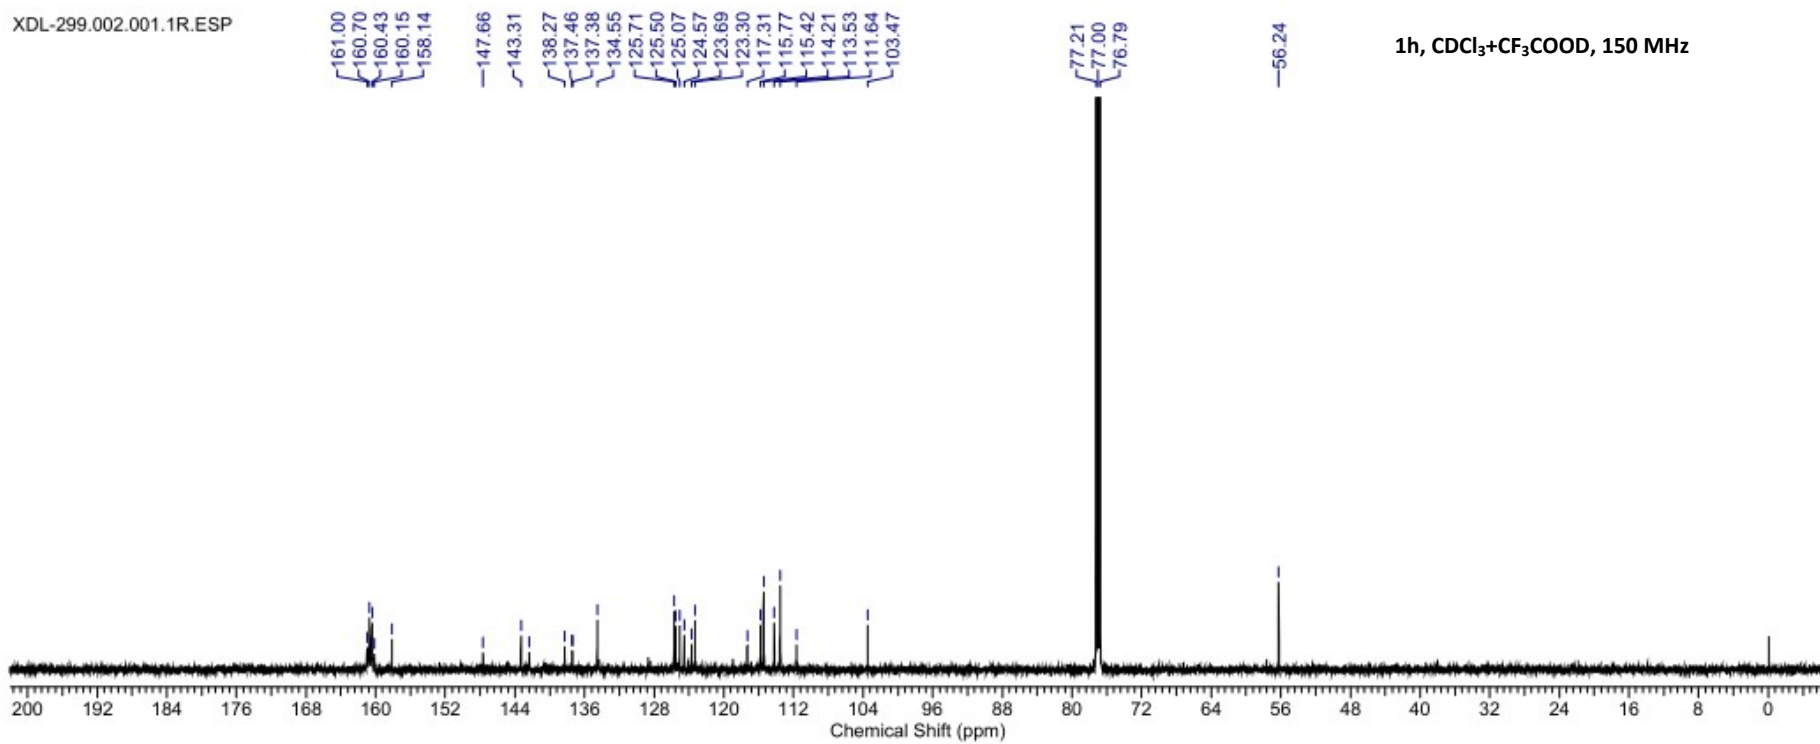

XDL-21299 #31 RT: 0.14 AV: 1 NL: 2.89E7  
T: FTMS + p ESI Full ms [100.0000-1500.0000]

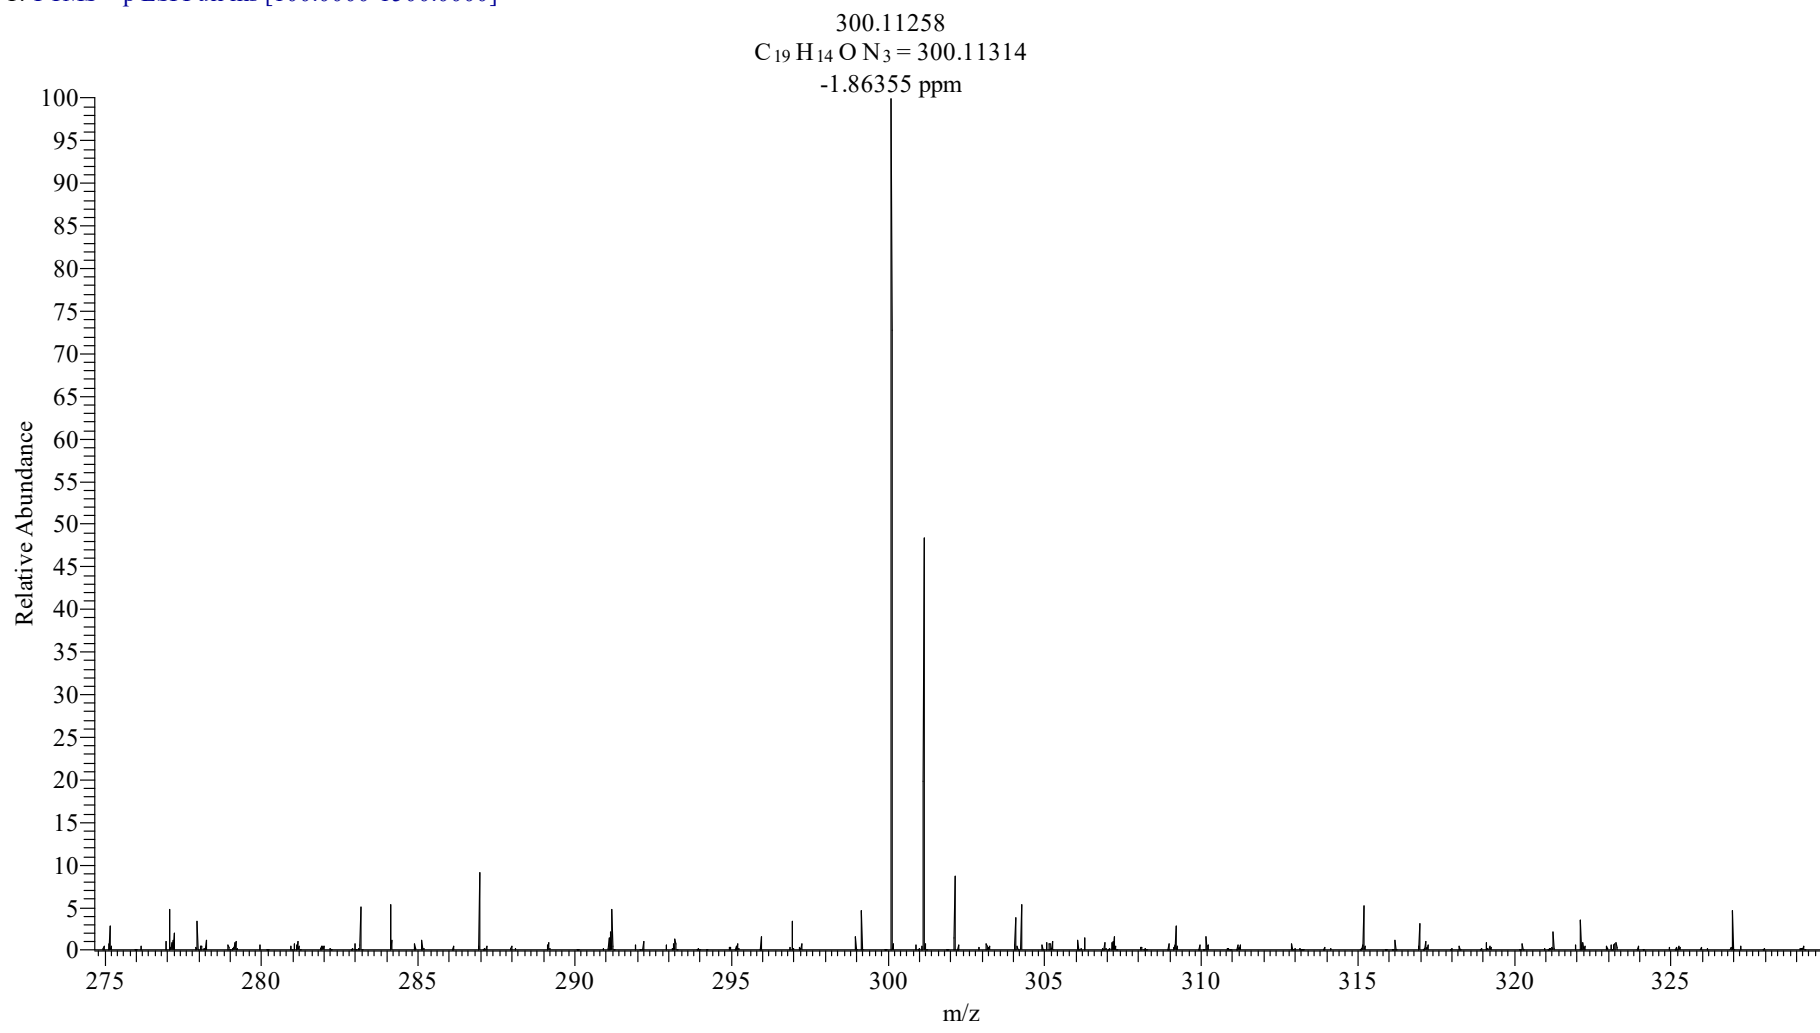

300.11258  
 $C_{19}H_{14}O_3 = 300.11314$   
-1.86355 ppm

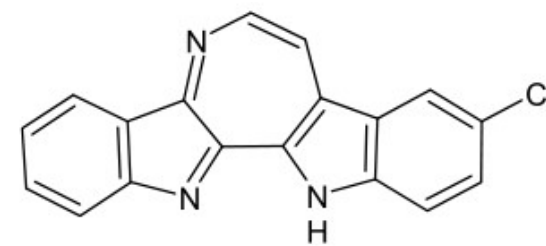

1i, CDCl<sub>3</sub>+CF<sub>3</sub>COOD, 600 MHz

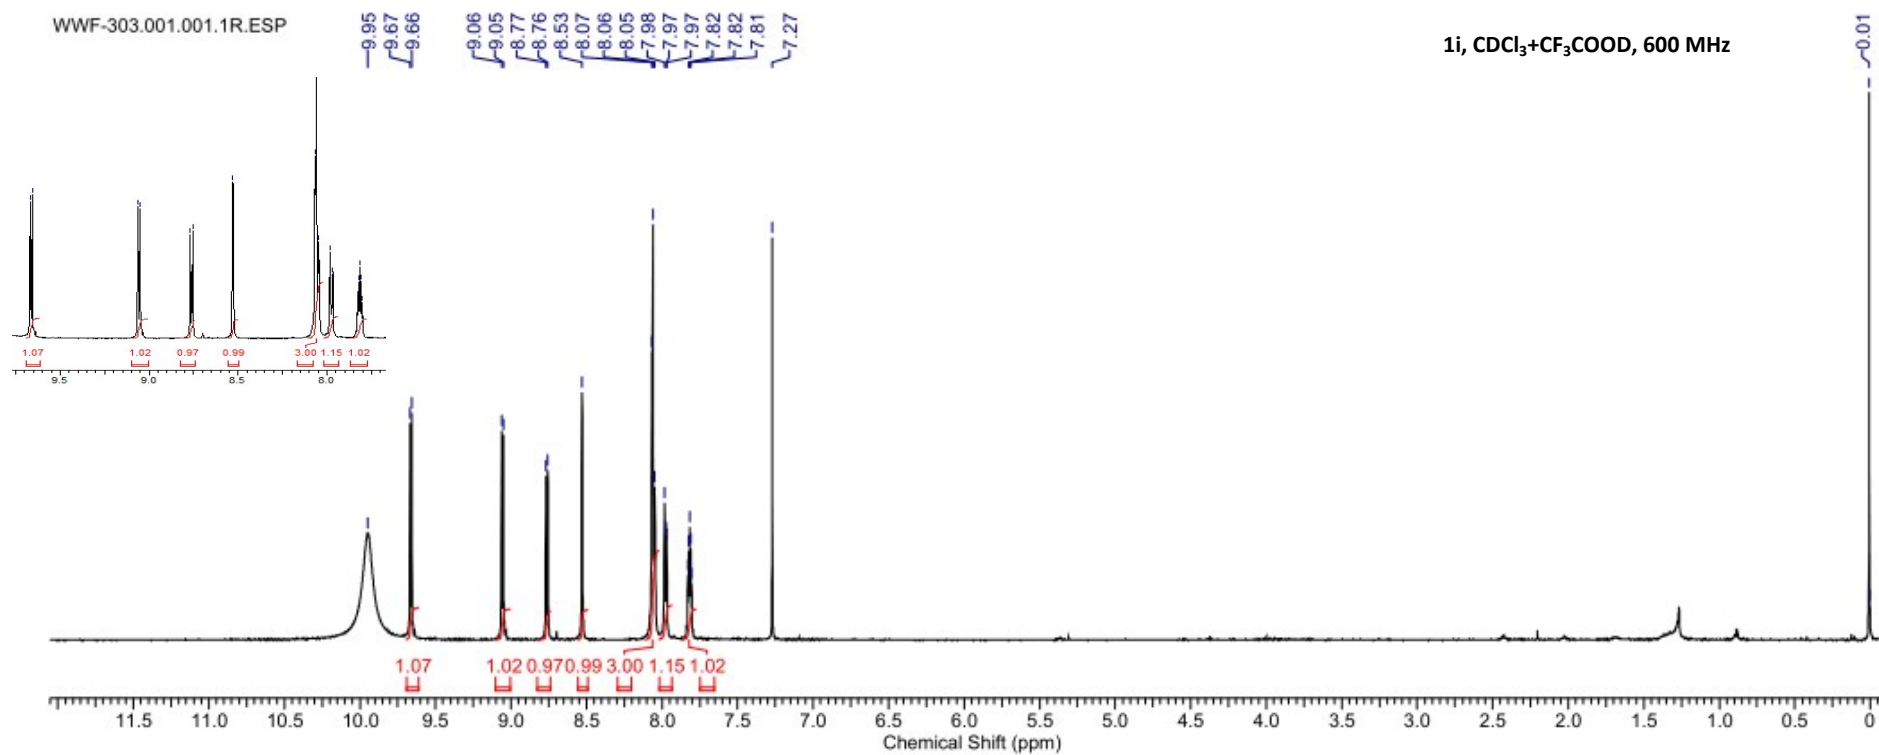



WWF-303.002.001.1R.ESP

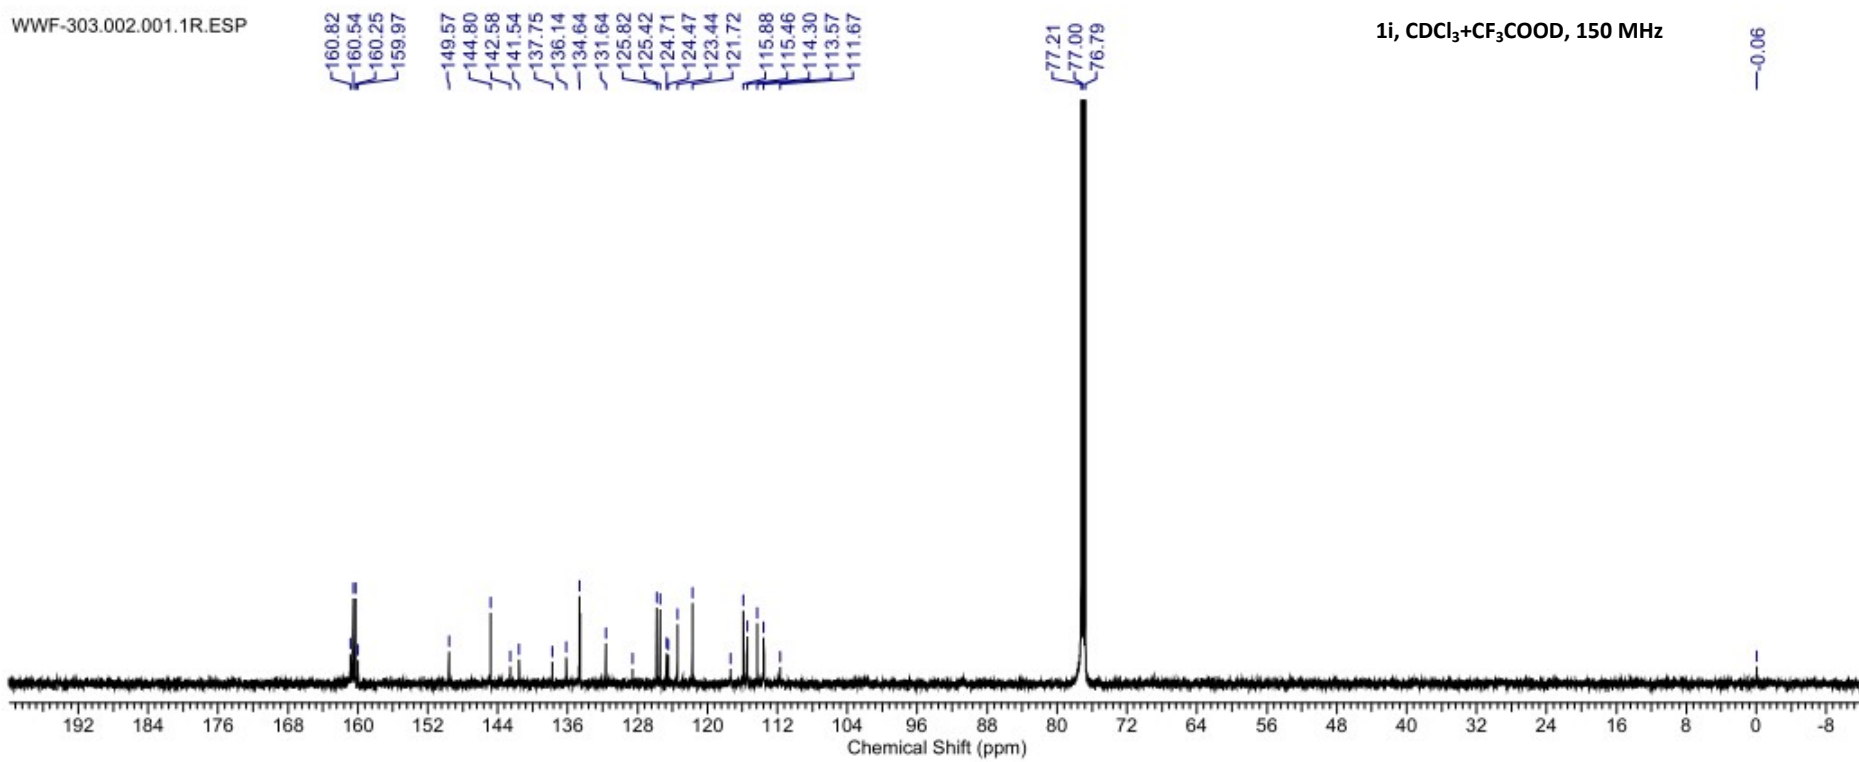

WWF-21304-1 #24 RT: 0.10 AV: 1 NL: 2.23E9  
T: FTMS + p ESI Full ms [100.0000-1500.0000]

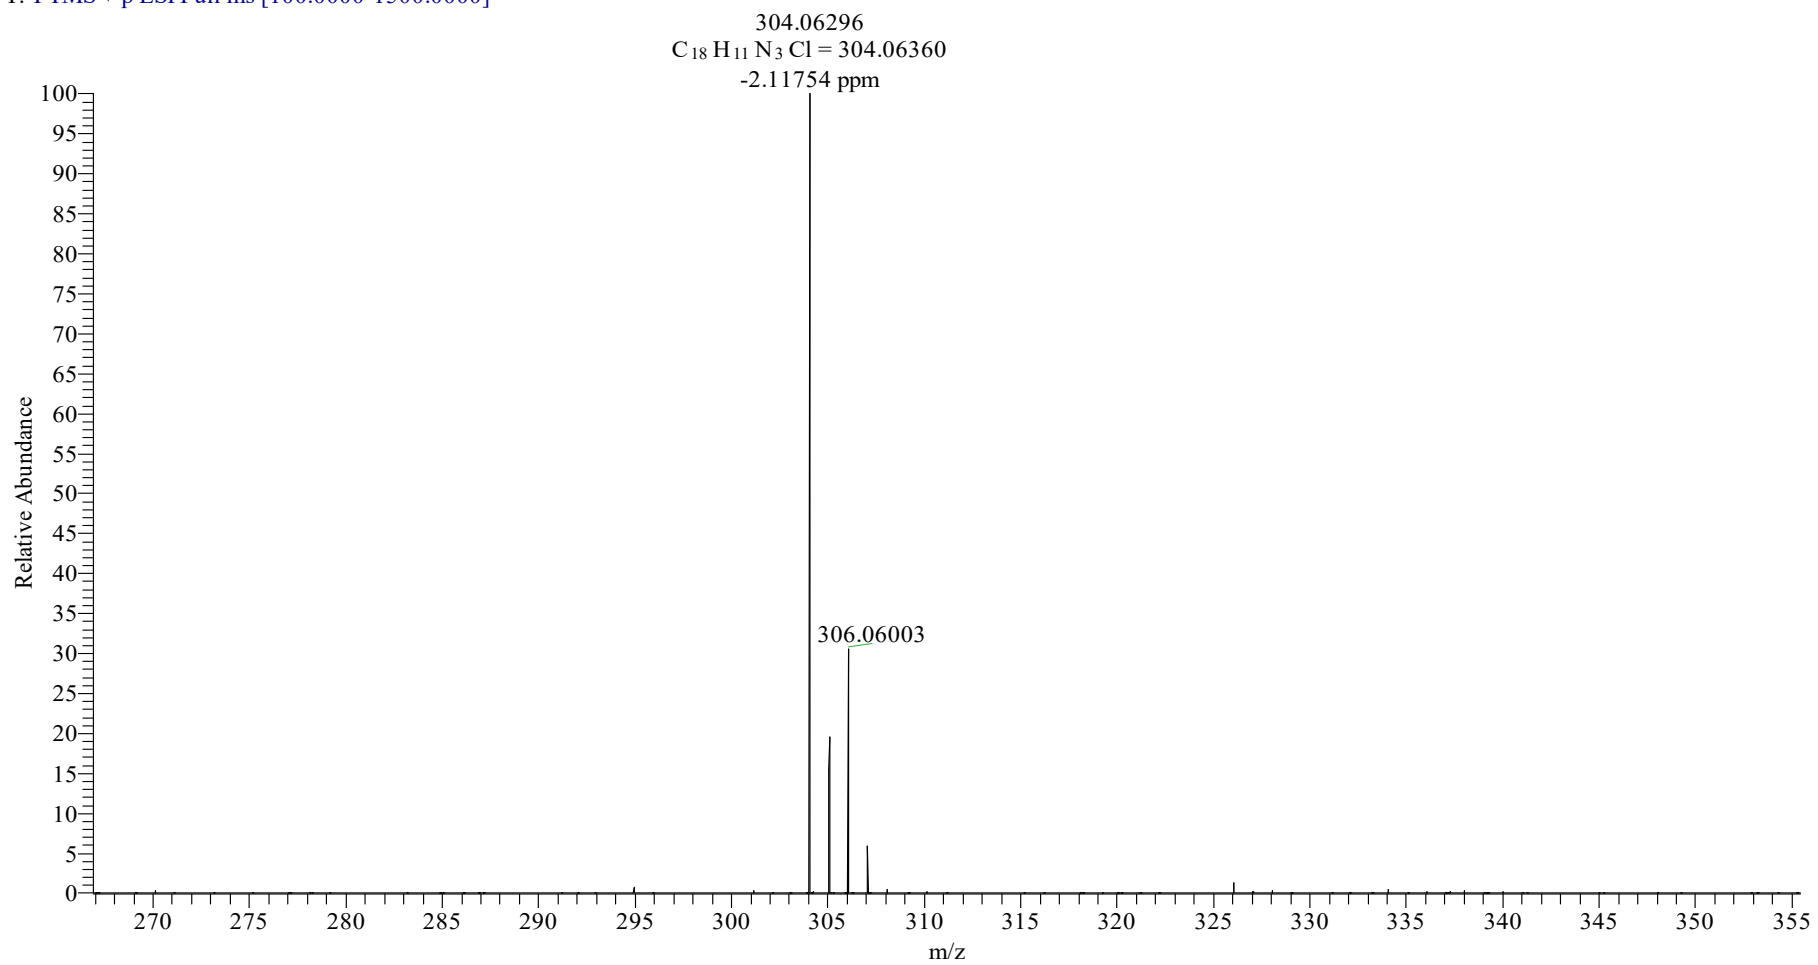

Supplement: d2ob00397j1.pdf [file d2ob00397j1.pdf]
